# Computing the daily reproduction number of COVID-19 by inverting the renewal equation

Luis Alvarez<sup>a,1</sup>, Miguel Colom<sup>b</sup>, Jean-David Morel<sup>c</sup>, and Jean-Michel Morel<sup>b</sup>

<sup>a</sup>CTIM. Departamento de Informática y Sistemas, Universidad de Las Palmas de Gran Canaria. Spain; <sup>b</sup>Université Paris-Saclay, ENS Paris-Saclay, CNRS, Centre Borelli, F-94235, Cachan, France.; <sup>c</sup>, Laboratoire de Physiologie Intégrative et Systémique Ecole Polytechnique Fédérale de Lausanne, AI 1144 Station 15 CH-1015 Lausanne Switzerland

1 **The COVID-19 pandemic has undergone frequent and rapid changes**  
2 **in its local and global infection rates, driven by governmental mea-**  
3 **sures, or the emergence of new viral variants. The reproduction**  
4 **number  $R_t$  indicates the average number of cases generated by an**  
5 **infected person at time  $t$  and is a key indicator of the spread of an**  
6 **epidemic. A timely estimation of  $R_t$  is a crucial tool to enable gov-**  
7 **ernmental organizations to adapt quickly to these changes and as-**  
8 **sess the consequences of their policies. The EpiEstim method is**  
9 **the most widely accepted method for estimating  $R_t$ . But it estimates**  
10  **$R_t$  with a delay of several days. Here, we propose a new method,**  
11 ***Epilinvert*, that shows good agreement with EpiEstim, but that pro-**  
12 **vides estimates of  $R_t$  up to 9 days in advance. We show that  $R_t$**   
13 **can be estimated by inverting the renewal equation linking  $R_t$  with**  
14 **the observed incidence curve of new cases,  $i_t$ . Our signal process-**  
15 **ing approach to this problem yields both  $R_t$  and a restored  $i_t$  cor-**  
16 **rected for the “weekend effect” by applying a deconvolution + denois-**  
17 **ing procedure. The implementations of the *Epilinvert* and EpiEstim**  
18 **methods are fully open-source and can be run in real-time on every**  
19 **country in the world, and every US state through a web interface at**  
20 **[www.ipol.im/ern](http://www.ipol.im/ern).**

COVID-19 | Renewal equation | Reproduction number | Integral equations

1 The reproduction number  $R_t$  is a key epidemiological param-  
2 eter evaluating transmission rate of a disease over time. It  
3 is defined as the average number of new infections caused by  
4 a single infected individual at time  $t$  in a partially susceptible  
5 population (1).  $R_t$  can be computed from the daily observa-  
6 tion of the incidence curve  $i_t$ , but requires empirical knowledge  
7 of the probability distribution  $\Phi_s$  of the delay between two  
8 infections (2, 3).

9 There are two different models for the incidence curve and  
10 its corresponding infection delay  $\Phi$ . In a theoretical model,  $i_t$   
11 would represent the real daily number of new infections, and  
12  $\Phi_s$  is sometimes called *generation time* (4, 5) and represents  
13 the probability distribution of the time between infection of a  
14 primary case and infections in secondary cases. In practice,  
15 neither parameter is easily observable because the infected are  
16 rarely detected before the appearance of symptoms and tests  
17 will be negative until the virus has multiplied over several  
18 days. What is routinely recorded by health organizations is  
19 the number of *new detected, incident cases*. When dealing  
20 with this real incidence curve,  $\Phi_s$  is called *serial interval* (4, 5).  
21 The serial interval is defined as the delay between the onset  
22 of symptoms in a primary case and the onset of symptoms in  
23 secondary cases (5).

24  $R_t$  is linked to  $i_t$  and  $\Phi$  through the *renewal equation*, first  
25 formulated for birth-death processes in a 1907 note of Alfred

Lotka (6). We adopt the Nishiura et al. formulation (7, 8),

$$i_t = \sum_{s=f_0}^f R_{t-s} i_{t-s} \Phi_s \quad \text{for } t = 0, \dots, t_c, \quad [1]$$

where  $t_c$  represents the current time (the last time at which  $i_t$   
was available),  $f_0$  and  $f$  are the maximal and minimal observed  
times between a primary and a secondary case.

It is important to note that secondary infections are some-  
times detected before primary ones, and therefore the min-  
imum delay  $f_0$  is generally negative (see Fig. 2). Equation  
[1] does not yield an explicit expression for  $R_t$ . Yet, an easy  
solution can be found for a simplified version of the renewal  
equation proposed in Cori et al in (5).

$$i_t = R_t \sum_{s=f_0}^f i_{t-s} \Phi_s, \quad [2]$$

by this equation,  $R_t$  is derived at time  $t$  from the past incidence  
values  $i_{t-s}$  by a simple division, with the assumption that  
 $f_0 \geq 0$ :

$$R_t = \frac{i_t}{\sum_{s=f_0}^f i_{t-s} \Phi_s}. \quad [3]$$

This method, implemented by the EpiEstim software, is highly  
recommended in a very recent review (10) signed by repre-  
sentatives from ten different epidemiological labs from several

## Significance Statement

Based on a signal processing approach we propose a method to compute the reproduction number  $R_t$ , the transmission rate of an epidemic over time.  $R_t$  is estimated by minimizing a functional that enforces: (i) the ability to produce an incidence curve  $i_t$  corrected of the weekly periodic bias produced by the “weekend effect”, obtained from  $R_t$  through a renewal equation; (ii) the regularity of  $R_t$ . A good agreement is found between our  $R_t$  estimate and the one provided by the currently accepted method, EpiEstim, except our method predicts  $R_t$  almost nine days closer to the present. We provide the mathematical arguments for this shift. Both methods, applied every day on each country, can be compared at [www.ipol.im/ern](http://www.ipol.im/ern).

L. Alvarez and J.-M. Morel designed and performed research and experiments and wrote the paper. L. Alvarez implemented the method. M. Colom built the online interface and collected and processed data. J.D. Morel rewrote parts and designed the statistical analysis and presentation of the results.

The authors declare no competing interests

<sup>1</sup> Luis Alvarez. E-mail: [lalvarez@ulpgc.es](mailto:lalvarez@ulpgc.es)

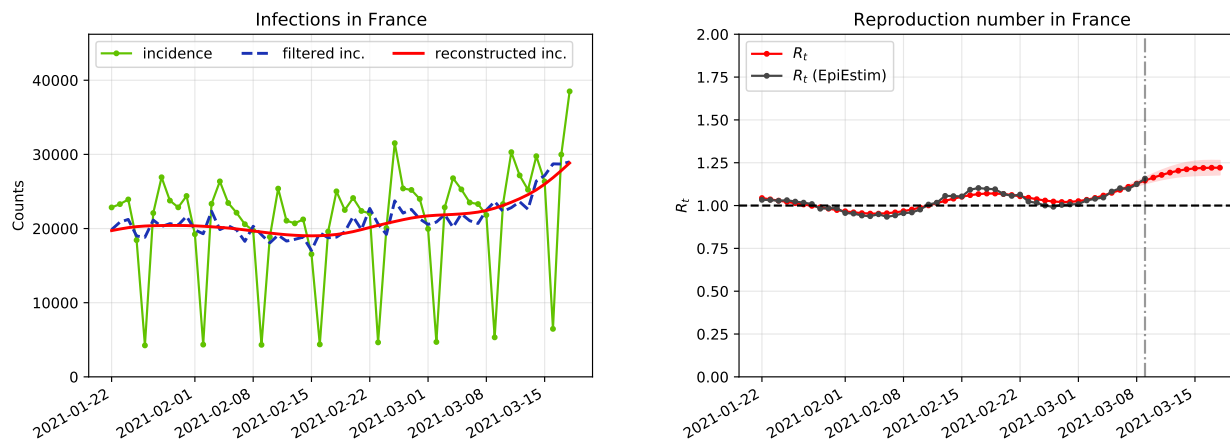

**Fig. 1.** Illustration of the EpiInvert method on the France incidence curve of new cases. On the left: in green, the raw oscillating curve of incident cases up to March 26, 2021. In blue, the incidence curve after correction of the "week-end bias". In red, the incidence curve simulated from  $R_t$  after the inversion of the renewal equation. On the right: in black,  $R_t$ , the reproduction number estimated by the current EpiEstim method, adopted by most health experts (9). Estimating its value every day guides the health policy of each country. Having  $R_t$  larger than 1, as it is the case for France on March 26, 2021 means that the pandemic is expanding. In red, the estimation of  $R_t$  by the EpiInvert method. This estimate, obtained by compensating the week-end bias and inverting the integral equation, predicts  $R_t$  nearly nine days closer to the present than EpiEstim.

45 continents. A detailed description of EpiEstim can be found  
 46 in the supporting information. Equation [2] is the standard  
 47 method, and of widespread use. In its stochastic formulation,  
 48 the first member  $i_t$  of Equation [2] is assumed to be a Poisson  
 49 variable, and the second member of this equation is interpreted  
 50 as the expectation of this Poisson variable. This leads to a  
 51 maximum likelihood estimation strategy to compute  $R_t$  (see  
 52 (5, 11–14)).

53 Comparing Equations [2] and [1] shows that the second  
 54 equation is derived from the first by assuming  $R_t$  constant  
 55 on the serial interval  $[t - f, t - f_0]$ . Replacing  $R_{t-s}$  by  $R_t$   
 56 in Equation [1] indeed yields Equation [2]. A more accurate  
 57 interpretation of the quotient on the right of Equation [3]  
 58 would be

$$59 \quad R_{t-\mu} = \frac{i_t}{\sum_{f_0}^f i_{t-s} \Phi_s}, \quad [4]$$

60 where  $\mu$  is a central value of the probability distribution of  
 61 the serial interval  $\Phi$  that could be, for instance, the median or  
 62 the mean. In the Ma et al. (15) estimate of the serial interval  
 63 for Covid-19, we have  $\mu \simeq 5.5$  for the median and  $\mu \simeq 6.7$  for  
 64 the mean. This supports that EpiEstim estimates  $R_t$  with an  
 65 average delay of more than 5 days.

66 In practice, the delay is even longer, due to the way the  
 67 sliding average of the incidence is calculated. Indeed, as  
 68 illustrated in Figure 1 the raw data of the incidence curve  $i_t$  can  
 69 oscillate strongly with a seven-day period. This oscillation has  
 70 little to do with the Poisson noise used in most aforementioned  
 71 publications. Government statistics are affected by changes of  
 72 testing and polling policies and by week-end reporting delays.  
 73 These recording delays and subsequent rash corrections result  
 74 in impulse noise, and a strong weekly periodic bias observable  
 75 on the incidence curve (in green) on the left of the figure 1.

76 To reliably estimate the reproduction number, a regularity  
 77 constraint on  $R_t$  is needed. Cori et al., initiators of the EpiEs-  
 78 tim method (5) use as regularity constraint the assumption  
 79 that  $R_t$  is locally constant in a time window of size  $\tau$  ending  
 80 at time  $t$  (usually  $\tau = 7$  days). This results in smoothing the  
 81 incidence curve with a sliding mean over 7 days. This assump-  
 82 tion has two limitations: it causes a significant resolution loss,

and an additional  $\frac{\tau}{2} = 3.5$  backward shift in the estimation of  
 $R_t$ , given that  $R_t$  is assumed constant in  $[t - \tau, t]$ .

In summary, the computation of  $R_t$  raises three challenges:

1. The renewal equation for incident cases involves future  
values of  $i_t$ , those for  $t + 1, \dots, t - f_0$ .
2. A simplification of the renewal equation [1] leads the  
standard method to estimate  $R_t$  with a backward shift of  
more than 5 days.
3. Smoothing of the week-end effect causes a further 3.5  
days shift.

These cumulative backward shifts cause a time delay of more  
than 8.5 days. In other terms, the value of  $R_t$  computed at  
time  $t$  refers approximately to  $R_{t-9}$ .

Here, we address these three issues by proposing a method  
that inverts Equation [1] without simplifying it. The result of  
EpiInvert, the inversion method developed here, is illustrated  
in Figure 1 (right), where the EpiEstim result (in black) is  
superposed with the estimate (in red) of  $R_t$  by EpiInvert.  
After registering both, the black EpiEstim curve stops nine  
days before EpiInvert, the red curve (our estimate). We found,  
using the incidence curve of 70 countries, that the optimal  
shift between the EpiEstim and EpiInvert  $R_t$  estimates is  
about  $8.3 \pm 0.5$  days and that the RMSE approximation error  
between both estimates is just about  $3.6\% \pm 1.9\%$ .

Indeed, the general integral equation [1] is a functional  
equation in  $R$ . Integral equations have been previously used  
to estimate  $R_t$ : in (16), the authors estimate  $R_t$  as the di-  
rect deconvolution of a simplified integral equation where  $i_t$   
is expressed in terms of  $R_t$  and  $i_t$  in the past, without using  
the serial interval. Such inverse problems involving noise and  
a reproducing kernel can be resolved through the Tikhonov-  
Arsenin (17) variational approach involving a regularization  
term. This method is widely used to solve integral equations  
and convolutional equations (18). The solution of the equation  
is estimated by an energy minimization. The regularity of the  
solution is obtained by penalizing high values of the derivative

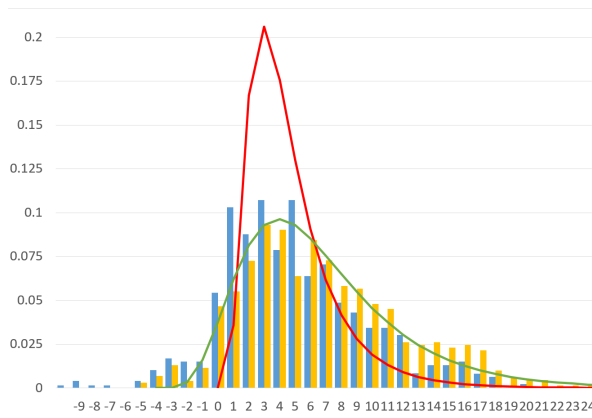

**Fig. 2.** Serial intervals used in our experiments: the discrete one proposed by Du et al. in (19) (solid bars in blue), the serial interval proposed by Ma et al. (15) (solid bars in orange) and its shifted log-normal approximation (in green), finally a log-normal approximation of the serial interval proposed by Nishiura et al. in (20) (in red).

## 2. Computing $R_t$ by a variational method

We consider two versions of the general renewal equation [1] given by

$$i_t = F(R, i, \Phi, t) \quad \text{for } t = 0, \dots, t_c, \quad [5]$$

where

$$F = F_1 \equiv R_t \sum_{s=f_0}^f i_{t-s} \Phi_s; \quad F = F_2 \equiv \sum_{s=f_0}^f i_{t-s} R_{t-s} \Phi_s. \quad [6]$$

$F_2$  corresponds to the general renewal equation and  $F_1$  to the simplified Cori et al. (5) version. The very same formula can also be derived for the classic Wallinga Teunis method (4), as shown in the supporting information. This last method is widely used to compute  $R_t$  retrospectively.

**Correcting the week-end effect** We must first formulate a compensation for the weekend effect, which in most countries is stationary, strong, and the main cause of discrepancy between  $i_t$  and its expected value  $F(i, R, \Phi, t)$ . To remove the weekend effect we estimate periodic multiplicative factors defined by a vector  $\mathbf{q} = (q_0, q_1, q_2, q_3, q_4, q_5, q_6)$ .

The variational framework we propose to estimate  $R_t$  is therefore given by the minimization of the energy

$$E(\{R_t\}; \mathbf{q}) = \sum_{t=0}^{t_c} \left( \frac{q_{t\%7} i_t - F(\{q_{t\%7} i_t\}, R, \Phi, t)}{p_{50}(i)} \right)^2 + w \sum_{t=1}^{t_c} (R_t - R_{t-1})^2 \quad [7]$$

where  $t\%7$  denotes the remainder of the Euclidean division of  $t$  by 7,  $t = 0$  represents the beginning of the epidemic spread and  $t_c$  the current day.

The weekend effect has varied over the course of the pandemic. Hence, for the estimate of  $\mathbf{q}$  it is better to use a time interval  $[t_c - T + 1, T]$  where  $T$  is fixed in the experiments to  $T = 56$  (8 weeks). This two months time interval is long enough to avoid overfitting and small enough to ensure that the testing policy has not changed too much. The optimization of  $R_t$  is instead performed through the whole time interval  $[0, t_c]$ . The corrected value  $\hat{i}_t = q_{t\%7} i_t$  amounts to a deterministic attenuation of the weekend effect on  $i_t$ . An obvious objection is that this correction might not be mean-preserving. To preserve the number of accumulated cases in the period of estimation, we therefore add the constraint

$$\sum_{t=t_c-T+1}^{t_c} i_t = \sum_{t=t_c-T+1}^{t_c} \hat{i}_t = \sum_{t=t_c-T+1}^{t_c} q_{t\%7} i_t, \quad [8]$$

to the minimization problem [7].

In that way, the multiplication by the factor  $q_{t\%7}$  produces a redistribution of the cases  $i_t$  during the period of estimation, but it does not change the global amount of cases. In Equation [7],  $p_{50}(i)$  is the 50th percentile (the median) of  $\{i_t\}_{t=t_c-T+1, \dots, t_c}$  used to normalize the energy with respect to the size of  $i_t$ . The first term of  $E$  is a data fidelity term which forces the renewal equation [5] to be satisfied as much as possible. The second term is a classic Tikhonov-Arsenin regularizer of  $R_t$ .

of the solution. Our variational formulation includes the correction of the weekly periodic bias, or “weekend effect”. The standard way to deal with a weekly periodic bias is to smooth the incidence curve by a seven days sliding mean. This implicitly assumes that the periodic bias is additive. The present study supports the idea that this bias is better dealt with as multiplicative. In the variational framework, the periodic bias is therefore corrected by estimating multiplicative periodic correction factors. This is illustrated on the left graphic of Fig. 1 where the green oscillatory curve is transformed into the blue filtered curve by the same energy minimization process that also computes  $R_t$  (on the right in red) and reconstructs the incidence curve up to present (on the left, in red).

### 1. Available serial interval functions for SARS-CoV-2

As we saw, the *serial interval* in epidemiology refers to the time between successive observed cases in a chain of transmission. Du et al. in (19) define it as “the time duration between a primary case (infector) developing symptoms and secondary case (infectee) developing symptoms.”

Du et al. in (19) obtained the distribution of the serial interval by a careful inquiry on 468 pairs of patients where one was the probable cause of the infection of the other. The serial distribution  $\Phi$  obtained in (19) has a significant number of cases on negative days, meaning that the infectee had developed symptoms up to  $f_0 = 10$  days before the infector. In addition to this first serial interval, we test a serial interval obtained by Nishiura et al. in (20) using 28 cases, which is approximated by a log-normal distribution, and a serial interval obtained by Ma et al. in (15) using 689 cases. As proposed by the authors this serial interval has been approximated by a shifted log-normal to take into account the cases in the negative days. In Fig. 2 we show the profile of the three serial intervals. There is good agreement of the serial intervals obtained by Du et al. (19) and Ma et al. (15)\*. Note that  $f_0 = -4$  for the Ma et al. serial interval,  $f_0 = 0$  for Nishiura et al. and  $f_0 = -10$  for Du et al. The discrete support of  $\Phi$  is therefore contained in the interval  $[f_0, f]$ .

\*In the online interface ([www.ipol.im/errn](http://www.ipol.im/errn)) the users can, optionally, upload their own distribution for the serial interval.

156  
157  
158  
159  
160  
161  
162  
163  
164  
165  
166  
167  
168  
169  
170  
171  
172  
173  
174  
175  
176  
177  
178  
179  
180  
181  
182  
183  
184  
185  
186  
187  
188  
189  
190  
191  
192  
193  
194  
195  
196  
197  
198  
199  
200

201 **The regularization weight.** The regularization weight  $w \geq 0$  is  
 202 a dimensionless constant weight fixing the balance between  
 203 the data adjustment term and the regularization term.

204 **Boundary conditions of the variational model.** Since  $t = 0$  is  
 205 the beginning of the epidemic spread where the virus runs free,  
 206 one is led to use an estimate of  $R_0 = R0$  based on the basic  
 207 reproduction number  $R0$ . (In the supporting information we  
 208 present a basic estimation of  $R0$  from the initial exponential  
 209 growth rate of the epidemic obtained as in (21)), therefore,  
 210 to solve Equation [7], we add the boundary condition  $R_0 =$   
 211  $R0$ . The proposed inversion model provides an estimation of  
 212  $R_t$  up to the current day  $t_c$ . Yet if  $f_0 < 0$ , the functional  
 213 [7] involves a few future values of  $R_t$  and  $i_t$  for  $t_c \leq t \leq$   
 214  $t_c - f_0$ . These values are unknown at present time  $t_c$ . We  
 215 use a basic linear regression using the last seven values of  $i_t$   
 216 to extrapolate the values of  $i_t$  beyond  $t_c$ . We prove in the  
 217 supporting information, that the boundary conditions and the  
 218 choice of the extrapolation procedure have a minor influence  
 219 in the estimation of  $R_t$  in the last days when minimizing [7].

220 All of the experiments described here can be reproduced  
 221 with the online interface available at [www.ipol.im/ern](http://www.ipol.im/ern). This  
 222 online interface allows one to assess the performance of the  
 223 method applied to the total world population and to any coun-  
 224 try and any state in the USA, with the last date updated to  
 225 the current date. We detail our daily sources in the supporting  
 226 information.

227 **An empirical confidence interval for  $R_t$ .** In absence of a statisti-  
 228 cal model on the distribution of  $R_t$ , no theoretical *a priori*  
 229 confidence interval for this estimate can be given. Neverthe-  
 230 less, a realistic confidence interval is obtained by the following  
 231 procedure:

- 232 1. Compute  $\{R^k(t)\}_{t \in [0, t_c - k]}$  by minimizing [7] for  $k =$   
 233  $1, 2, 3$ , using the data sequence up to  $t_c - k$ .
- 234 2. Compute for each  $t \in [0, t_c]$  a confidence bound of  $R_t$   
 235 with respect to its value  $R^1(t)$ ,  $R^2(t)$  and  $R^3(t)$  in the  
 236 three preceding days given by

$$237 \quad \sigma(t) = \sqrt{\frac{\sum_{k=1}^3 (R_t - R^k(t))^2}{3}}, \quad [9]$$

238 where  $R^k(t)$  in  $(t_c - k, t_c]$  are obtained by linear extrapo-  
 239 lation.

240 We then define a conservative empirical confidence interval  
 241 as  $[R_t - 2 \cdot \sigma(t), R_t + 2 \cdot \sigma(t)]$ . This interval is displayed for each  
 242  $t$  in the online algorithm [www.ipol.im/ern](http://www.ipol.im/ern) and has the aspect of  
 243 a fattened curve above and below  $R_t$ .

244 **Efficiency measure of the weekly bias correction.** We esti-  
 245 mate the correction of the weekly periodic bias by the efficiency  
 246 measure

$$247 \quad \mathcal{I} = \sqrt{\frac{\sum_{t=t_c-T+1}^{t_c} (\hat{i}_t - F(\hat{i}, R, \Phi, t))^2}{\sum_{t=t_c-T+1}^{t_c} (i_t - F(i, R1, \Phi, t))^2}}. \quad [10]$$

248  $\mathcal{I}$  represents the reduction factor of the RMSE between the  
 249 incidence curve and its estimate using the renewal equation  
 250 after correcting the week-end bias.  $\hat{i}_t = i_t q_{t\%7}$  and  $R$  are  
 251 the optimal values for the energy [7] and  $R1$  denotes the  $R$

estimate without correction of the weekly bias. The value  
 of  $\mathcal{I}$  can be used to assess whether it is worth applying the  
 correction of the weekly periodic bias to a given country in a  
 given time interval.

252 **Estimation of the temporal shift between EpiEstim and Epi-**  
 253 **Invert.** In what follows, we will denote by  $R_t^i$  the EpiEstim  
 254 estimation of the reproduction number by Cori et al. in (5),  
 255 detailed in the supporting information. As we have argued  
 above, we expect a significant temporal shift between  $R_t$  and  
 $R_t^i$ , of the order of 9 days. This expectation is strongly con-  
 firmed by the experimental results, and can be checked by  
 applying the proposed method to any country using the online  
 interface available at [www.ipol.im/ern](http://www.ipol.im/ern). In summary, the time  
 shift between both methods should be a half-week (3.5 days)  
 for  $F \equiv F_1$  and by Equation [4] of about  $\mu + 3.5 \simeq 9$  for  
 $F \equiv F_2$ . This will be verified experimentally by computing  
 the shift  $\tilde{t}$  between  $R_t^i$  and  $R_t$  yielding the best RMSE between  
 both estimates:

$$256 \quad \tilde{t} = \arg \min_{t \in [0, 12]} \mathcal{S}(t) \equiv \sqrt{\frac{\sum_{k=t_c-T+1}^{t_c} (R_{k-t} - R_k^i)^2}{T}} \quad [11] \quad 270$$

271 where  $T = 56$  (8 weeks) and where we evaluate  $R_{k-t}$  for  
 272 non-integer values of  $k - t$  by linear interpolation.

#### 273 Summary of the algorithm parameters and options.

- 274 • choice of the serial interval : the default options are the  
 275 serial intervals obtained by Ma et al. (we use the shifted  
 276 log-normal approximation), Nishiura et al. and Du et al.  
 277 The users can also upload their own serial interval;
- 278 • choice of the renewal equation used,  $F \equiv F_1$  or  $F \equiv F_2$ ;
- 279 •  $w$ : regularization weight, with default values  $w = 5$  for  
 280  $F \equiv F_1$  and  $w = 5.5$  for  $F \equiv F_2$ ;
- 281 • Correction of the weekly periodic bias (option by default)

282 Note that the regularization weight  $w$  is the only numerical  
 283 mandatory parameter.

284 **Summary of the output displayed at [www.ipol.im/ern](http://www.ipol.im/ern).** First we  
 285 draw two charts. In the first one we draw  $R_t$  and  $R_t^i$  shifted  
 286 back  $\tilde{t}$  days where  $\tilde{t}$  is defined in [11].  $R_t$  is surrounded by  
 287 a shaded area that represents the above defined empirical  
 288 confidence interval. In the second chart, we draw the initial  
 289 incidence curve  $i_t$  in green, the incidence curve after the cor-  
 290 rection of the weekly periodic bias  $\hat{i}_t = i_t q_{t\%7}$  in blue, and the  
 291 evaluation of the renewal equation given by  $t \rightarrow F(\hat{i}, R, \Phi, t)$   
 292 in red. For each experiment we also compute :

- 293 1.  $R_{t_c}$  : last available value of the EpiInvert  $R_t$  estimate.
- 294 2.  $R_{t_c}^i$  : last available value of the EpiEstim estimate  $R_t^i$ .
- 295 3.  $\tilde{t}$  : optimal shift (in days) between  $R$  and  $R^i$  defined in  
 296 [11].
- 297 4.  $\mathcal{S}(\tilde{t})$  : RMSE between  $R$  and  $R^i$  shifted back  $\tilde{t}$  days  
 298 (defined in [11]).
- 299 5.  $\mathcal{V}(i)$  : variability of the original incidence curve,  $i_t$ , given  
 300 by :

$$301 \quad \mathcal{V}(i) \equiv \frac{\|i'\|_{L^1[t_c-T, t_c]}}{\|i\|_{L^1[t_c-T, t_c]}} \approx \frac{\sum_{t=t_c-T+1}^{t_c} |i_t - i_{t-1}|}{\sum_{t=t_c-T+1}^{t_c} i_t} \quad [12]$$

- 302 6.  $\mathcal{V}(\hat{i})$  : variability of the filtered incidence  $\hat{i}_t$  after the  
 303 correction of the weekly periodic bias.



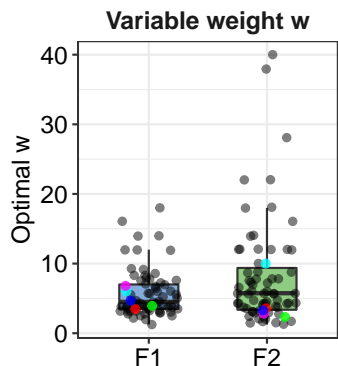

**Fig. 3.** Distribution of  $w$  for  $F_1$  and  $F_2$  when the regularization weight  $w$  and the delay  $\tilde{t}$  are optimized independently for each country to minimize the average error  $S(\tilde{t})$  between the EpiEstim and the EpiInvert methods on a time lapse of 56 days. France in blue, Japan in green, Peru in cyan, South Africa in magenta, USA in red.

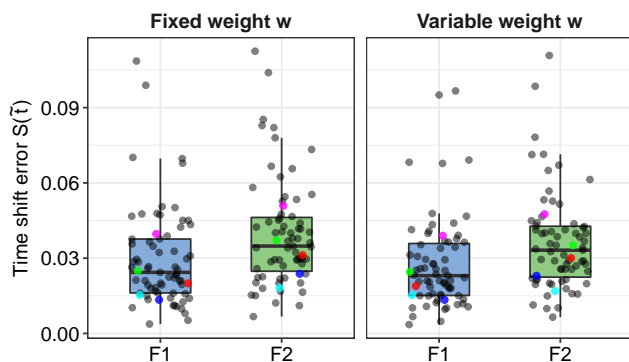

**Fig. 4.** Average error  $S(\tilde{t})$  over 56 consecutive days of the error between the EpiEstim and the EpiInvert estimates of  $R_t$  for each country. France in blue, Japan in green, Peru in cyan, South Africa in magenta, USA in red.

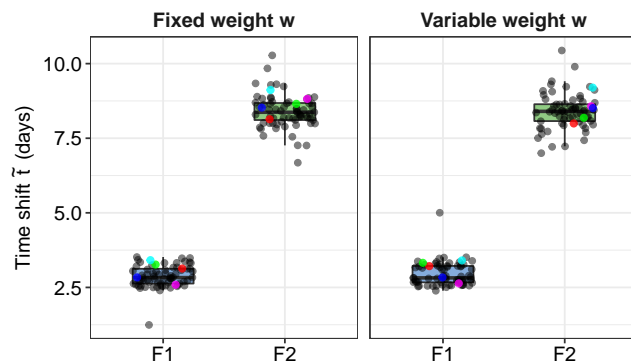

**Fig. 5.** Optimal time shift  $\tilde{t}$  obtained by minimizing the mean error  $\tilde{S}(t)$  over 56 days between the EpiEstim and the EpiInvert estimates of  $R_t$  for each country. The time shift is as predicted by our theoretical analysis close to 3 days for  $F_1$  and slightly above 8 days for  $F_2$ . On the left  $w$  is fixed and on the right it is the optimal weight per country. France in blue, Japan in green, Peru in cyan, South Africa in magenta, USA in red.

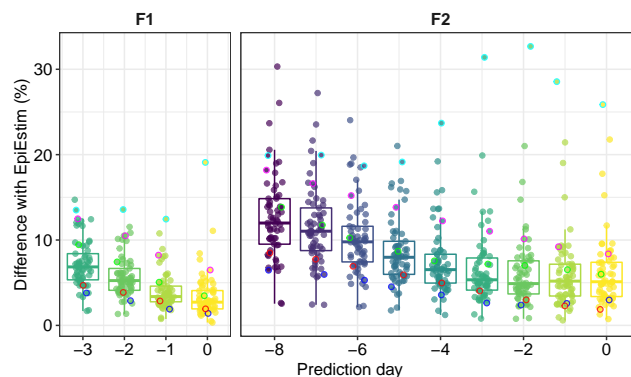

**Fig. 6.** Relative error between the EpiInvert and EpiEstim estimations, depending on the anticipation day. EpiInvert anticipates the value of  $R_t$  by 0 to 3 days in the  $F_1$  formulation and by 0 to 8 days in the  $F_2$  formulation. Each dot represents one country. France in blue, Japan in green, Peru in black, South Africa in magenta, USA in red.

- 304 7.  $\mathcal{I}$  : reduction factor of the RMSE error between the inci-  
 305 dence curve and its estimate using the renewal equation  
 306 after the correction of the weekly periodic bias (defined  
 307 in [10]).  
 308 8.  $\mathbf{q} = (q_0, \dots, q_6)$  : the correction coefficients of the weekly  
 309 periodic bias ( $q_6$  corresponds to the current time  $t_c$ ).

### 3. Results

311 To estimate a reference value for the regularization parameter  
 312  $w$  we used the incidence data up to Saturday March 18, 2021  
 313 for the 70 countries showing the larger number of cases. For  
 314 each country, we optimized the RMSE  $S(\tilde{t})$  between  $R$  and  $R^i$   
 315 shifted back  $\tilde{t}$  days (defined in [11]). This optimization was  
 316 performed with respect to  $w$  and  $\tilde{t}$ . The goal was to fix  $w$ , the  
 317 only parameter of the method so that the result of EpiInvert  
 318 is as close as possible to EpiEstim in the days where both  
 319 methods predict  $R_t$ . The second goal of this optimization was  
 320 to estimate the effective time shift  $\tilde{t}$  between both methods.

321 In Fig. 3 we show the box plot of the distribution of  $w$   
 322 for  $F_1$  and  $F_2$  when  $w$  was optimized independently for each  
 323 country to minimize the average error over 56 days between  
 324 the EpiEstim and the EpiInvert methods. The mean  $w$  was  
 325  $5.5 \pm 2.4\%$  for  $F_1$  and  $5.9 \pm 2.9\%$  for  $F_2$  which indicated that  
 326 a common value of  $w$  could be fixed for all countries. Here  
 327 and in all figures to follow, each dot represents a country.

328 In Fig 4, we show, for the versions  $F_1$  and  $F_2$  of the renewal  
 329 equation, the average error  $S(\tilde{t})$  over 56 consecutive days of the

error between the EpiEstim and the EpiInvert estimates of  $R_t$  330  
 for each country. The overall average error is  $2.9\% \pm 1.7\%$  for  $F_1$  331  
 and  $3.6\% \pm 1.9\%$  for  $F_2$ . As is apparent by comparing the box 332  
 plots on the left and right, the increase of the error  $S(\tilde{t})$  was 333  
 insignificant when fixing  $w$  for all countries (“fixed weight”) 334  
 instead of optimizing jointly on  $w$  and  $\tilde{t}$  for all countries 335  
 (“variable weight”). In all experiments, we therefore fixed the 336  
 value of  $w$  to its median for all countries namely  $w = 5$  for 337  
 $F \equiv F_1$ , and  $w = 5.5$  for  $F \equiv F_2$ . Once fixed, we optimized 338  
 again  $S(\tilde{t})$  with respect to  $\tilde{t}$ . 339

In the box plot of Fig. 5 we show, for the versions  $F_1$  and 340  
 $F_2$  of the renewal equation, the optimal time shift  $\tilde{t}$  obtained 341  
 by minimizing the mean error  $\tilde{S}(t)$  over 56 days between the 342  
 EpiEstim and the EpiInvert estimates of  $R_t$  for each country. 343  
 As is apparent by comparing the box plots on the left and 344  
 right, there is almost no change on  $\tilde{t}$  when fixing  $w$  for all 345  
 countries (“fixed weight”) instead of optimizing jointly on  $w$  346  
 and  $\tilde{t}$  for all countries. We obtain respectively  $\tilde{t} = 2.96 \pm 0.42$  347  
 for variable  $w$  and  $\tilde{t} = 2.86 \pm 0.43$  for  $F_1$  with fixed  $w$ , and 348  
 similarly for  $F_2$ :  $\tilde{t} = 8.33 \pm 0.55$  and  $\tilde{t} = 8.38 \pm 0.52$ . 349

As shown in Fig. 4, the agreement between  $R_t$  and  $R_t^i$  350  
 shifted back by the optimal delay  $\tilde{t}$  is overwhelming. Indeed, for 351  
 $F \equiv F_1$ , we obtain that the median of their relative difference 352  
 $S(\tilde{t})$  is just 2.43%. For  $F \equiv F_2$ , it is 3.3%. The median of the 353

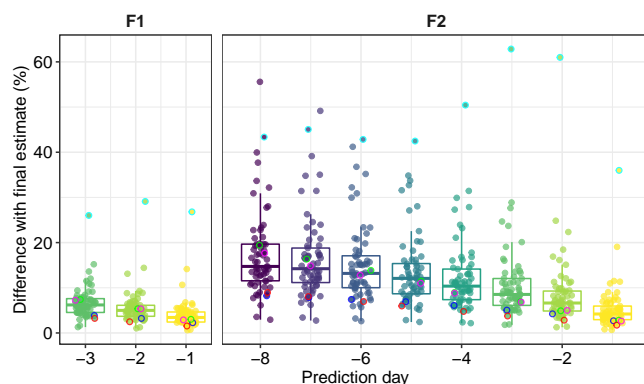

**Fig. 7.** Internal relative error between the EpiInvert estimations depending on the anticipation day. Each dot represents one country. The mean difference for each prediction day is marked by a horizontal bar. The standard deviation of the relative error is half the height of each box. France in blue, Japan in green, Peru in black, South Africa in magenta, USA in red.

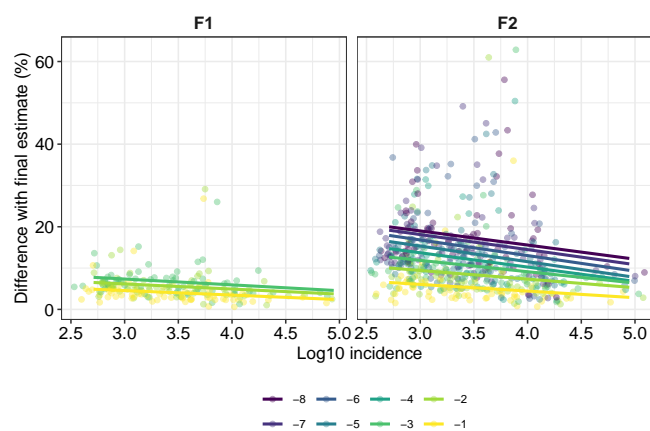

**Fig. 8.** Linear regression of the internal relative error between the EpiInvert estimation as a function of the mean incidence. The regression lines are clearly decreasing, which means that a higher incidence favors a better estimate of  $R_t$ .

354 shift  $\tilde{t}$  is given by 2.89 (for  $F \equiv F_1$ ) and 8.33 (for  $F \equiv F_2$ ).  
 355 These results are in good agreement with the discussion about  
 356 the EpiEstim method we have presented above, which led  
 357 to predict a time delay of 3.5 days for  $F \equiv F_1$  and about  
 358 9 days for  $F \equiv F_2$ . The difference between the predicted  
 359 time delay and the observed one therefore is 0.5 days. This  
 360 is easily explained by the regularization term in Equation  
 361 [7], which forces  $R_t$  to resemble  $R_{t-1}$ . In summary, these  
 362 experiments show that EpiEstim predicts at time  $t$  a value  $R_t$   
 363 which corresponds to day  $t - 8.5$  or  $t - 3.5$ , and that EpiInvert  
 364 predicts at time  $t$  a value  $R_t$  which corresponds to day  $t - 0.5$ .

365 We now explore the reliability of the EpiInvert estimate,  
 366 which as we saw can anticipate an estimate of  $R_t$  by more  
 367 than 8 days with respect to EpiEstim. Let us denote by  $R_{t'}(t)$   
 368 the EpiInvert estimate at time  $t$  using the incidence curve up  
 369 to the date  $t' \geq t$ . According to the estimated shift between  
 370  $R_t$  and  $R_t^i$ , for  $F \equiv F_1$ ,  $R_t(t-3)$  should be similar to  $R_t^i$ . The  
 371 first estimation of  $R_t(t-3)$  is obtained 3 days before when  
 372 we compute  $R_{t-3}(t-3)$ .

373 In Fig. 6 we show a box plot of the relative error between  
 374 the EpiInvert and EpiEstim estimations, depending on the  
 375 anticipation day. EpiInvert anticipates the value of  $R_t$  by 0 to  
 376 3 days in the  $F_1$  formulation and by 0 to 8 days in the  $F_2$   
 377 formulation. Each dot represents one country. On the left of Fig.  
 378 6, for  $F \equiv F_1$ , we compare for  $k = -3, -2, -1, 0$  the means of  
 379 the relative errors  $|R_{t+k}(t-3) - R^i(t)|$  for  $t \in [t_c - T + 1, t_c]$   
 380 ( $T = 56$ ) and for the 70 countries selected as the ones with  
 381 higher incidence. On the right of Fig. 6, for  $F \equiv F_2$ , we compare,  
 382 in the same way,  $|R_{t+k}(t-8) - R^i(t)|$  for  $k = -8, -7, \dots, 0$ .  
 383 Notice that the difference between the EpiInvert and EpiEstim  
 384 estimates cannot be considered as an approximation error. A  
 385 good agreement is expected between both estimates but the  
 386 method underlying both estimations is different. Our goal was  
 387 not to approximate the EpiEstim method, but to solve the  
 388 renewal equation in a more exact formulation. Nevertheless,  
 389 it was important to verify that EpiInvert finds very similar  
 390 values to EpiEstim on their common interval of definition.  
 391 These values are predicted by EpiInvert more than 8 days  
 392 in advance. As expected, this relative error grows for the  
 393 early predictions. Nevertheless, for the renewal equation  $F_2$ ,  
 394 one observes a plateau of this error between days -4 and 0  
 395 with a mean difference of about 5.5%. Even with an 8 days

396 anticipation, the average relative error on  $R_t$  stays below 12%.  
 397

398 Finally, we are obviously interested in the internal coherence  
 399 of the EpiInvert predictions. Indeed, contrarily to EpiEstim,  
 400 the EpiInvert estimate  $R_{t'}(t)$  at time  $t$  evolves for  $t' \geq t$  and  
 401 becomes more accurate at later dates. Fig. 7 gives a box plot  
 402 of the internal relative error between the EpiInvert estimations  
 403 depending on the anticipation day. On the left, for  $F \equiv F_1$ ,  
 404 we compare for  $k = -3, -2, -1$  the means of the relative  
 405 errors  $|R_{t+k}(t-3) - R_t(t-3)|$ . On the right, for  $F \equiv F_2$ ,  
 406 we compare, in the same way,  $|R_{t+k}(t-8) - R_t(t-8)|$  for  
 407  $k = -8, \dots, -1$ . Since the estimate of EpiInvert at each day  
 408 evolves with the knowledge of the incidence in later days, we  
 409 can see how this estimate evolves as time passes. Each dot  
 410 represents one country. We see that the relative error on  $R$   
 411 at a given date  $t$  goes down almost linearly from 14% in an  
 412 early prediction (8 days ahead) to 4.4% (1 day ahead). The  
 413 robustness of the prediction is positively affected by incidence  
 414 numbers.

415 Fig. 8 indeed shows, for each anticipation day  $k =$   
 416  $-1, -2, \dots$ , the linear regression of the internal relative error  
 417 between the EpiInvert estimations at days 0 and  $k$ , viewed  
 418 as a function of the mean incidence of the country. These  
 419 eight regression lines are clearly decreasing, which means that  
 420 a higher incidence favors a better estimate of  $R_t$ . Last but  
 421 not least, we evaluate the reduction obtained on the “week-  
 422 end effect”. Fig. 9 shows a regression plot of the reduction  
 423 factor of the oscillation of  $i_t$  obtained by applying correcting  
 424 coefficients to reduce the “week-end effect”. This reduction  
 425 decreases from about 0.5 to less than 0.25, the plots being  
 426 ordered in increasing order of average incidence. This indicates  
 427 that higher incidences lead to a more regular 7 days periodicity  
 428 of the week-end effect. In <https://ctim.ulpgc.es/covid19/BoxPlots/>  
 429 Fig. 6 and 7 are presented in interactive mode with tooltip  
 430 detailed statistics on each country.

#### 4. CONCLUSION

431  
 432 The reproduction number  $R_t$  can be estimated by solving a  
 433 renewal equation linking  $R_t$ ,  $i_t$  and  $\Phi_s$ . We considered the  
 434 formulations of the renewal equation providing the named  
 435 instantaneous reproduction number ( $F \equiv F_1$ ) and the named

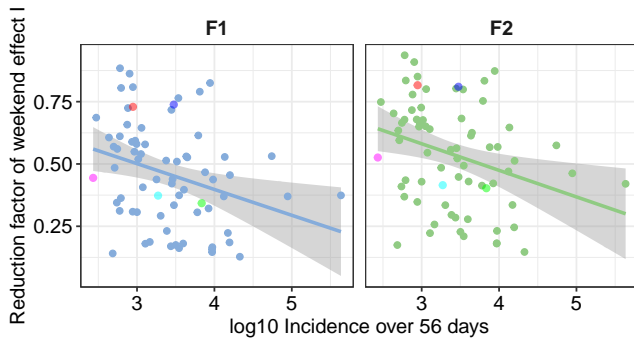

**Fig. 9.** Reduction factor  $\mathcal{I}$  (see [10]) obtained by applying correcting coefficients to reduce the “week end effect”. This reduction decreases from about 0.5 to less than 0.25. The plots are ordered in increasing order of average incidence.

19. Z Du, et al., The serial interval of COVID-19 from publicly reported confirmed cases. *medRxiv* (2020). 490
20. H Nishiura, NM Linton, AR Akhmetzhanov, Serial interval of novel coronavirus (COVID-19) infections. *Int. journal infectious diseases* (2020). 491
21. L Alvarez, Comparative analysis of the first wave of the COVID-19 pandemic in South Korea, Italy, Spain, France, Germany, the United Kingdom, the USA and the New-York state. *MedRxiv* (2020). 492

effective reproduction number ( $F \equiv F_2$ ). The daily incidence data  $i_t$  recorded by health administrations show a strong non-Poisson quasi-periodic behavior. In order to get an estimate of  $R_t$  we introduced a classic regularity constraint on  $R_t$  and we corrected the weekly periodic bias observed in the incidence curve  $i_t$  by a simple variational formulation. Our proposed variational model, EpiInvert, also computes an empirical confidence interval. In contrast to former methods, EpiInvert can use serial intervals with distributions containing negative days (as it is the case for the COVID-19). Thus, it avoids an artificial truncation of the distribution. EpiInvert shows excellent agreement with EpiEstim. Its main improvement is to anticipate by several days the estimate of  $R_t$ : about 3 days for the  $F_1$  formulation of the renewal equation, and more than 8 days for its  $F_2$  formulation. This last fact is extremely relevant, given that the control of social distancing policies requires a timely estimate of  $R_t$ .

1. P Rodpathong, P Auewarakul, Viral evolution and transmission effectiveness. *World J. Virol.* **1**, 131 (2012). 453
2. X He, et al., Temporal dynamics in viral shedding and transmissibility of covid-19. *Nat. medicine* **26**, 672–675 (2020). 454
3. P Ashcroft, et al., Covid-19 infectivity profile correction. *arXiv preprint arXiv:2007.06602* (2020). 455
4. J Wallinga, P Teunis, Different epidemic curves for severe acute respiratory syndrome reveal similar impacts of control measures. *Am. J. epidemiology* **160**, 509–516 (2004). 456
5. A Cori, NM Ferguson, C Fraser, S Cauchemez, A new framework and software to estimate time-varying reproduction numbers during epidemics. *Am. journal epidemiology* **178**, 1505–1512 (2013). 457
6. AJ Lotka, Relation between birth rates and death rates. *Science* **26**, 21–22 (1907). 458
7. H Nishiura, Time variations in the transmissibility of pandemic influenza in Prussia, Germany, from 1918–19. *Theor. Biol. Med. Model.* **4**, 20 (2007). 459
8. H Nishiura, G Chowell, *The Effective Reproduction Number as a Prelude to Statistical Estimation of Time-Dependent Epidemic Trends*, eds. G Chowell, JM Hyman, LMA Bettencourt, C Castillo-Chavez. (Springer Netherlands, Dordrecht), pp. 103–121 (2009). 460
9. K Gostic, et al., Practical considerations for measuring the effective reproductive number, Rt. *MedRxiv* (2020). 461
10. KM Gostic, et al., Practical considerations for measuring the effective reproductive number, r t. *PLoS computational biology* **16**, e1008409 (2020). 462
11. R Thompson, et al., Improved inference of time-varying reproduction numbers during infectious disease outbreaks. *Epidemics* **29**, 100356 (2019). 463
12. QH Liu, et al., Measurability of the epidemic reproduction number in data-driven contact networks. *Proc. Natl. Acad. Sci.* **115**, 12680–12685 (2018). 464
13. T Obadia, R Haneef, PY Boëlle, The r0 package: a toolbox to estimate reproduction numbers for epidemic outbreaks. *BMC medical informatics decision making* **12**, 147 (2012). 465
14. TZ Boulimezaoud, L Alvarez, M Colom, JM Morel, A Daily Measure of the SARS-CoV-2 Effective Reproduction Number for all Countries. *Image Processing On Line* **10**, 191–210 (2020) <https://doi.org/10.5201/ipol.2020.304>. 466
15. S Ma, et al., Epidemiological parameters of coronavirus disease 2019: a pooled analysis of publicly reported individual data of 1155 cases from seven countries. *Medrxiv* (2020). 467
16. J Demongeot, K Oshinubi, H Seligmann, F Thuderoz, Estimation of daily reproduction rates in covid-19 outbreak. *medRxiv* (2021). 468
17. AN Tikhonov, VY Arsenin, Solutions of ill-posed problems. *New York* **1**, 30 (1977). 469
18. M Benning, M Burger, Modern regularization methods for inverse problems. *Acta Numer.* **27**, 1–111 (2018). 470

## 497 Supporting Information

498 In this section we describe and analyze the EpiEstim method  
499 and its parameters (Section A). We prove in Section B that  
500 the Wallinga-Teunis method is actually computing  $R_t$  by the  
501  $F_1$  form of the renewal equation. Section C presents imple-  
502 mentation details of EpiInvert. Section D makes a case study  
503 of Cuba, France, Spain and the USA. Section E contains a  
504 thorough presentation of 86 results for a collection of countries  
505 and US states in alphabetic order.

506 **A. The EpiEstim method.** One of the most widely used meth-  
507 ods to estimate the instantaneous reproduction number is the  
508 EpiEstim method proposed by Cori et al. (5). In what follows,  
509 we will denote by  $R_t^i$  the EpiEstim estimation. The authors  
510 show that if  $i_t$  follows a Poisson distribution with expectation  
511  $\lambda = \mathbb{E}[i_t] = R_t^i \sum_{s=1}^t i_{t-s} \Phi_s$  and  $R_t^i$  is assumed to follow a  
512 gamma prior distribution  $\Gamma(a, b)$ , then the following analytical  
513 expression can be obtained for the posterior distribution of  
514  $R_t^i$ :

$$515 R_{t,\tau}^i = \frac{a + \sum_{s=t-\tau+1}^t i_s}{b^{-1} + \sum_{s=t-\tau+1}^t \sum_{k=1}^f i_{s-k} \Phi_k}, \quad [A]$$

516 where  $R_t^i$  is assumed to be locally constant in a time window  
517 of size  $\tau$  ending at time  $t$ . However,  $i_t$  does not follow a  
518 Poisson distribution as its local variance in most states much  
519 higher than its mean, being dominated by the weekend effect.  
520 In this method, implemented in the EpiEstim R package, a  
521 regularization of the estimation is introduced by assuming  
522 that  $R_t^i$  is constant in a time window of size  $\tau$  ending at time  
523  $t$ . We found that the parameters  $a$  and  $b$  of the prior Gamma  
524 distribution  $\Gamma(a, b)$ , have very little influence on the current  
525 estimation of  $R_t^i$ . Cori et al. in (5) proposed to use  $a = 1$   
526 and  $b = 5$ . Taking into account the magnitude of the current  
527 number of daily cases in countries affected by Covid-19, the  
528 contribution of  $a$  and  $b$  to the expression [A] can be neglected.  
529 As shown in (14), assuming that the mean  $ab$  of the prior  
530 Gamma distribution  $\Gamma(a, b)$  satisfies

$$531 ab = \frac{\sum_{s=t-\tau+1}^t i_s}{\sum_{s=t-\tau+1}^t \sum_{k=1}^f i_{s-k} \Phi_k}, \quad [B]$$

532 equation [A] becomes

$$533 R_{t,\tau}^i = \frac{\bar{i}_{t,\tau}}{\sum_{k=1}^f \bar{i}_{t-k,\tau} \Phi_k} \quad [C]$$

534 which corresponds to the usual  $R_t^i$  estimate obtained directly  
535 from equation [2] applied to  $\bar{i}_t$ , where  $\bar{i}_t$  is the average of  $i_t$  in  
536 the interval  $[t - \tau, t]$ . Therefore, if we remove the parameters  $a$   
537 and  $b$  from the estimation of  $R_t^i$ , the main difference between  
538 the EpiEstim estimation and the one proposed here for  $F \equiv F_1$   
539 is that in EpiEstim, a serial interval with non-positive values  
540 is not allowed and that the regularity is forced by a backward  
541 seven day average of the incidence curve. This is replaced  
542 by a regularity term in the proposed variational formulation.  
543 Notice that due to the backward averaging of the incidence  
544 curve, we can expect a time shift between both estimations.

**B. The Wallinga and Teunis computation of  $R_t$ .** The Wallinga-  
Teunis (4) method is also implemented in the EpiEstim pack-  
age and widely considered as a reliable method to compute  
 $R_t$  retrospectively (10). Its formulas to estimate  $R_t$  at time  $t$

require the knowledge of  $i_t$  for  $t = 0, \dots, t + f$ . Starting from  
the original definitions of the authors, we give a mathematical  
proof that their method is actually computing  $R_t$  by the  $F_1$   
form of the renewal equation. The method is based on the  
following estimation of the “relative likelihood,  $p_{k,l}$ , that a  
case  $k$  has been infected by case  $l$ ”,

$$p_{k,l} = \frac{\Phi(t_k - t_l)}{\sum_{m=1, m \neq k}^n \Phi(t_k - t_m)}$$

545 where  $n$  represents the reported cases and  $t_k$  is the time of  
546 infection for the case  $k$ . Wallinga and Teunis define the *case*  
547 *reproduction number* by

$$548 R_t = \sum_k p_{k,t}. \quad [D]$$

549 Since  $R_t$  only depends on the time of infection  $t_l$ , it is actually  
550 an estimation of the reproduction number at time  $t = t_l$ , so  
551 the Wallinga and Teunis estimate,  $R_t^{WT}$ , of the reproduction  
552 number can be expressed as:

$$553 R^{WT}(t) = \sum_k \frac{\Phi(t_k - t)}{\sum_{m=1, m \neq k}^n \Phi(t_k - t_m)} \quad [E]$$

554 It remains to establish a relation of  $R^{WT}(t)$  with the solution  
555  $\tilde{R}_t$  obtained by the renewal equation with  $F \equiv F_1$ ,

$$556 \tilde{R}_t = \frac{i_t}{\sum_{s>0} i_{t-s} \Phi_s}. \quad [F]$$

557 Grouping in the sum in [E] the cases  $k$  such that  $t_k = \bar{t}$  and  
558 taking into account that there are  $i_{\bar{t}}$  such cases,  $R_t^{WT}$  can be  
559 rewritten as

$$560 R_t^{WT} = \sum_{\bar{t}} \frac{\Phi(\bar{t} - t) i_{\bar{t}}}{\sum_{s>0} i_{\bar{t}-s} \Phi_s} = \sum_{\bar{t}} \Phi(\bar{t} - t) \tilde{R}_{\bar{t}}. \quad [G]$$

561 We can therefore interpret  $R_t^{WT}$  as the forward convolution  
562 of the initial estimate  $\tilde{R}_t$  with the kernel given by  $\Phi_s$ . On  
563 the other hand, as explained above, the EpiEstim estimate  $R_t^i$   
564 can be interpreted (if we neglect the parameters  $a$  and  $b$  of  
565 the Gamma distribution) as the application of Equation [F] to  
566 the incidence curve filtered by sliding average on  $[t - \tau + 1, t]$ .  
567 In conclusion the Cori et al. and the Wallinga and Teunis  
568 methods use the renewal equation  $F \equiv F_1$ . Note, however, that  
569 the Wallinga and Teunis method computes the reproduction  
570 number only retrospectively. Indeed, the computation of  $R_t^{WT}$   
571 requires the values of  $i_{\bar{t}}$  for any  $\bar{t} > t$  such that  $\Phi(\bar{t} - t) > 0$ .  
572 This fact was observed in Cori et al.: (in the WT approach),  
573 “estimates are right censored, because the estimate of  $R$  at  
574 time  $t$  requires incidence data from times later than  $t$ .”

## 575 C. Implementation details of EpiInvert.

**Alternate minimization of the energy [7].** To minimize the energy  
[7], we use an alternate minimization algorithm with respect  
to  $R_t$  and  $\mathbf{q}$ . Indeed, if  $\mathbf{q}$  is fixed, then the optimization of  
the energy [7] with respect to  $R_t$  leads to a linear system of  
equations that is easily solved. In what follows, we will denote  
by  $R(t, i, \mathbf{q})$  the result of this minimization. On the other  
hand, when  $R_t$  is fixed, the minimization of [7] with respect



583 to  $\mathbf{q}$  also leads to a linear system of equations. The constraint  
584 [8] is expressed as an additional linear equation,

$$585 \quad \mu_0 q_0 + \mu_1 q_1 + \mu_2 q_2 + \mu_3 q_3 + \mu_4 q_4 + \mu_5 q_5 + \mu_6 q_6 = \sum_{t=t_c-T+1}^{t_c} i_t, \quad [\text{H}]$$

586 where  $\mu_k = \sum_{t=t_c-T+1}^{k+7t \leq t_c} i_{k+7t}$ . This linear constraint is easily  
587 included in the minimization procedure using, for instance,  
588 Lagrange multipliers. So  $\mathbf{q}$  is computed as the unique solution  
589 of the associated linear system. In what follows we will denote  
590 by  $\mathbf{q}(R)$  the result of this minimization. Let us denote by  $R_t^n$   
591 and  $\mathbf{q}^n$  the estimation of  $R_t$  and  $\mathbf{q}$  in the iteration  $n$  of the  
592 alternate minimization algorithm. We also denote by  $i_t^n =$   
593  $i_t \cdot q_{t\%7}^n$  the filtered incidence curve at iteration  $n$ . We initialize  
594  $n = 0$ ,  $i^0 \equiv i$ ,  $\mathbf{q}^0 \equiv 1$  and we compute  $R_t^0 = R(t, i^0, \mathbf{q}^0)$  as the  
595 minimizer of the energy [7] with respect to  $R_t$  for  $\mathbf{q} \equiv \mathbf{q}^0$ .

596 The whole method is summarized in Algorithm 1, where  
597 the maximum number of iterations is fixed to  $MaxIter = 100$ .

---

**Algorithm 1** Estimation of  $\hat{i}$ ,  $R$ ,  $\mathbf{q}$  from  $i$  and  $\Phi$ .

---

**Initialization:**  $i^0 \equiv i$ ,  $\mathcal{I}^0 = 1$ ,  $\mathbf{q}^0 \equiv 1$ . compute  $R_t^0 =$   
 $R(t, i^0, \mathbf{q}^0)$  minimizing [7] with respect to  $R_t$ .

**for**  $n = 1, 2, \dots, MaxIter$  **do**

    compute  $\mathbf{q}^n = \mathbf{q}(R^{n-1})$  minimizing [7] with respect to  $\mathbf{q}$ .

    compute  $i_t^n = q_{t\%7}^n i_t$ .

    compute  $\mathcal{I}^n$  using [10].

**if**  $\mathcal{I}^n > \mathcal{I}^{n-1}$  **then**

        | stop the iteration

**else**

$\hat{i} \equiv i^n$ .

$\mathbf{q} \equiv \mathbf{q}^n$ .

        compute  $R_t^n = R(t, i^n, \mathbf{q}^n)$  minimizing [7] with respect  
        to  $R_t$ .

$R = R^n$ .

**end**

**end**

**return**  $\hat{i}$ ,  $R$ ,  $\mathbf{q}$ .

---

598 **Initial boundary condition, for**  $t = 0$ . The evaluation of  
599  $F_2(i, R, \Phi, t)$  requires values of  $R_t$  and  $i_t$  beyond the inter-  
600 val  $[0, t_c]$ . Given the boundary conditions established, we  
601 assume that  $R_t = R_0$  for  $t < 0$  and  $R_t = R_{t_c}$  for  $t > t_c$ .  
602 Concerning  $i_t$ , for  $t < 0$  we will assume, as usual, that at the  
603 beginning of the epidemic spread the virus is in free circulation  
604 and the cumulative number of infected detected  $I_t \equiv \sum_{k=0}^t i_k$   
605 follows an exponential growth for  $t < 0$ , that is  $I_t = I_0 e^{at}$ ,  
606 where  $a$  represents the initial exponential growth rate of  $I_t$   
607 at the beginning of the infection spread. We now naturally  
608 estimate  $a$  by

$$609 \quad a = \text{median}(\{\log\left(\frac{I_{t+1}}{I_t}\right) : t = 0, \dots, 14\}). \quad [\text{I}]$$

610 If we assume that  $I_t = I_0 e^{at}$  follows initially an exponential  
611 growth and that  $R_t = R_0$  is initially constant, then we can  
612 compute  $R_0$  from the exponential growth  $a$  and the renewal  
613 equation taking into account that

$$614 \quad i_0 = I_0(1 - e^{-a}) = I_0 R_0 \sum_{k=f_0}^f (e^{-ka} - e^{-(k+1)a}) \Phi_k. \quad [\text{J}]$$

Hence, we can compute an approximation of  $R_0$  as

$$615 \quad R_0 = \frac{1 - e^{-a}}{\sum_{k=f_0}^f (e^{-ka} - e^{-(k+1)a}) \Phi_k}. \quad [\text{K}] \quad 616$$

Note that this estimation strongly depends on the serial interval  
617 used. For instance, if we assume that  $a = 0.250737$  (the  
618 exponential growth rate obtained in (21) when the coronavirus  
619 is in free circulation), we obtain that  $R_0 = 2.700635$  for the  
620 Nishiura et al. serial interval,  $R_0 = 3.084528$  for the Ma et  
621 al. serial interval and  $R_0 = 1.839132$  for the Du et al. serial  
622 interval. 623

**Boundary condition for**  $[t > t_c]$ . The proposed inversion model  
624 provides an estimation of  $R_t$  up to the current day  $t_c$ . An  
625 obvious objection is that if  $f_0 < 0$ , the functional [7] involves  
626 a few future values of  $R_t$  and  $i_t$  for  $t_c \leq t \leq t_c - f_0$ . These  
627 values are unknown at present time  $t_c$ . We use a basic linear  
628 regression to extrapolate the values of  $i_t$  beyond  $t_c$ . To  
629 compute the regression line ( $i = m_7 \cdot t + n_7$ ) we use the last  
630 seven values of  $i_t$ . In summary, the extension of  $i_t$  beyond the  
631 observed interval  $[0, t_c]$  is defined by 632

$$633 \quad i_t = \begin{cases} I_0 e^{at} - I_0 e^{a(t-1)} & \text{if } t < 0; \\ m_7 \cdot t + n_7 & \text{if } t > t_c. \end{cases} \quad [\text{L}]$$

The above defined boundary conditions has a very minor  
634 influence in the final estimation of  $R_t$  in the last days when  
635 minimizing [7]. Indeed, the extension of  $i_t$  for  $t < 0$  is only  
636 relevant at the beginning of the epidemic spread. On the other  
637 hand, the extension of  $i_t$  for  $t > t_c$  is only required when the  
638 serial interval has negative values. For instance, to evaluate  
639 the renewal equation in the energy at the current time  $t_c$  using  
640 this approach for  $F \equiv F_2$  we use the expression

$$641 \quad i_{t_c} = \sum_{s=0}^f i_{t_c-s} R_{t_c-s} \Phi_s + \sum_{s=f_0}^{-1} i_{t_c-s} R_{t_c} \Phi_s,$$

642 and the extension of  $i_t$  for  $t > t_c$  is only used in the last term  
643 of the above expression where the values of  $\Phi_s$  are usually  
644 very small. Hence the influence of this extension procedure  
645 for  $i_t$  is also almost negligible. To confirm this claim, we  
646 compared, using the shifted log-normal approximation of the  
647 serial interval proposed by Ma et al., the estimate of  $R_{t_c}$   
648 using the extrapolation based on a linear regression of the  
649 last 7 days, with the basic extrapolation given by  $i_t = i_{t_c}$  for  
650  $t > t_c$ . Computing the absolute value of the difference of both  
651 estimates for 81 countries we obtain that the quartiles of such  
652 distribution of values are  $Q_0 = 6.6 \cdot 10^{-6}$ ,  $Q_1 = 1.3 \cdot 10^{-4}$ ,  
653  $Q_2 = 3.1 \cdot 10^{-4}$ ,  $Q_3 = 5.7 \cdot 10^{-4}$  and  $Q_4 = 4.9 \cdot 10^{-3}$ . We  
654 conclude that extrapolation of  $i_t$  beyond  $t_c$  is a valid strategy  
655 to estimate  $R_t$  up to  $t = t_c$ .

**Pre-processing the incidence curve.** Some countries do not pro-  
648 vide data on holidays or weekends and only provide the cu-  
649 mulative total of cases on the next working day. To avoid the  
650 strong discontinuity in the data sequence produced by the lack of  
651 data, we automatically divide the case numbers of the first  
652 non-missing day, between the number of days affected. We do  
653 not allow negative numbers in the incidence curve. By default,  
654 we replace by zero any negative value of the incidence curve. 655

## D. Case studies: Cuba, France, Spain, USA and World

The country data about the registered daily infected are taken from <https://ourworldindata.org>. In the particular cases of France, Spain and Germany we use the official data reported by the countries. For the US states, the data are obtained from the New York Times report available at <https://raw.githubusercontent.com/nytimes/covid-19-data/master/us-states.csv>.

In Fig. S1 we show the charts obtained for the world population with  $F \equiv F_1$  and  $F \equiv F_2$ . Table S1 contains a summary of the values computed for each experiment. To compute the EpiEstim estimation  $R_t^i$ , we used  $\tau = 7$ , that is, we assumed that  $R_t$  is constant in  $[t - 7, t]$ . As proposed by Cori et al. in (5) we used  $a = 1$  and  $b = 5$  for the parameters of the  $\Gamma(a, b)$  prior distribution for  $R_t$ . Yet, as explained above, these values could be neglected in the EpiEstim estimation, given the magnitude of the incidence data in these regions.

The total world population shows a clear weekly periodic bias. The correction of this bias works quite well, as the RMSE reduction reaches  $\mathcal{I} = 0.337$  for  $F \equiv F_1$  and  $\mathcal{I} = 0.380$  for  $F \equiv F_2$ . The oscillation of the incidence curve is strongly reduced, passing from  $\mathcal{V}(i) = 0.115$  to  $\mathcal{V}(\hat{i}) = 0.063$ . The agreement with EpiEstim is also excellent as  $\mathcal{S}(\hat{i}) = 0.01$  for  $F \equiv F_1$  and  $\mathcal{S}(\hat{i}) = 0.014$  for  $F \equiv F_2$ . The daily bias correction factors are similar for  $F \equiv F_1$  and  $F \equiv F_2$ . On Sundays and Mondays the number of cases is underestimated and overestimated on Wednesdays, Thursdays and Fridays.

France also displays a clear weekly periodic bias: on Mondays the number of cases is strongly underestimated, and on Wednesdays it is strongly overestimated. The correction of the periodic bias works well, as  $\mathcal{I} = 0.481$  for  $F \equiv F_1$  and  $\mathcal{I} = 0.513$  for  $F \equiv F_2$ . The oscillation of the incidence curve is therefore reduced, passing from  $\mathcal{V}(i) = 0.329$  to  $\mathcal{V}(\hat{i}) = 0.202$ . The agreement with the EpiEstim method is good, with  $\mathcal{S}(\hat{i}) = 0.026$  for  $F \equiv F_1$  and  $\mathcal{S}(\hat{i}) = 0.025$  for  $F \equiv F_2$ .

Spain is special: it does not provide data on weekends or holidays. In that case a constant value is being assigned to  $i_t$  in the affected days. Despite this, the correction of the weekly periodic bias works again well and yields  $\mathcal{I} = 0.171$  for  $F \equiv F_1$  and  $\mathcal{I} = 0.290$  for  $F \equiv F_2$ . The oscillation of the incidence curve reduces from  $\mathcal{V}(i) = 0.135$  to  $\mathcal{V}(\hat{i}) = 0.087$ . The agreement with the EpiEstim method is good, with  $\mathcal{S}(\hat{i}) = 0.025$  for  $F \equiv F_1$  and  $\mathcal{S}(\hat{i}) = 0.046$  for  $F \equiv F_2$ . Observe how the incidence curve is underestimated on Sundays, Mondays and Tuesdays, and overestimated on Thursdays, Fridays and Saturdays.

In the USA we obtain  $\mathcal{I} = 0.450$  for  $F \equiv F_1$  and  $\mathcal{I} = 0.569$  for  $F \equiv F_2$ . The oscillation of the incidence curve is reduced from  $\mathcal{V}(i) = 0.130$  to  $\mathcal{V}(\hat{i}) = 0.085$ . The agreement with EpiEstim is again very good with  $\mathcal{S}(\hat{i}) = 0.014$  for  $F \equiv F_1$  and  $\mathcal{S}(\hat{i}) = 0.023$  for  $F \equiv F_2$ . On Sundays the number of cases is underestimated, and overestimated on Fridays.

Although in general countries present a clear weekly periodic pattern in the incidence curve this is not the case for Cuba. In this country we obtain  $\mathcal{I} = 0.890$  for  $F \equiv F_1$  and  $\mathcal{I} = 0.928$  for  $F \equiv F_2$ . The incidence curve oscillation is slightly reduced after the correction of the periodic bias. Finally, the agreement with the EpiEstim method is good, with  $\mathcal{S}(\hat{i}) = 0.034$  for  $F \equiv F_1$  and  $\mathcal{S}(\hat{i}) = 0.041$  for  $F \equiv F_2$ .

The values of the bias correction coefficients  $q_k$  obtained

for  $F \equiv F_1$  and  $F \equiv F_2$  are quite similar. So it seems that the choice of the renewal equation has no significant influence on the estimation of the bias correction coefficients.

The optimal shift  $\tilde{t}$  between  $R_t$  is  $R_t^i$  fits in the range obtained by a joint analysis of the 70 countries. Indeed, for  $F \equiv F_1$   $\tilde{t}$  ranges from 2.72 to 3.50 and for  $F \equiv F_2$   $\tilde{t}$  ranges from 8.00 to 9.7.

**E. Additional experiments.** We can start this large set of experiments with a recent example in France showing how EpiInvert gives a valuable extension to EpiEstim. In Fig. S2 we observe a very good agreement between the EpiEstim estimate of  $R(t)$  by March 26 ( $R(t) = 1.239$ ) and the EpiInvert estimate 8 days in advance ( $R(t) = 1.221$ ). But the EpiInvert estimate is more regular and it does not produce the singularity observed in the EpiEstim estimate by March 15.

Next, for  $F \equiv F_2$ , using the data of incidence curve up to March 26, 2021, we present a collection of 64 experiments on different countries and separately 24 experiments on some US states. The regions are sorted in alphabetic order. For each experiment we show the charts and the following selection of numerical values:

1.  $\mathcal{I}$ : reduction factor of the RMSE error between  $i_t$  and  $F(i, R, \Phi, t)$  before and after the correction of the weekly periodic bias defined as:

$$\mathcal{I} = \sqrt{\frac{\sum_{t=t_c-T+1}^{t_c} (\hat{i}_t - F(\hat{i}, R, \Phi, t))^2}{\sum_{t=t_c-T+1}^{t_c} (i_t - F(i, R1, \Phi, t))^2}}. \quad [M]$$

where  $\hat{i}$  represents the incidence curve after correction and  $R1(\cdot)$  represents the initial  $R_t$  estimate without correcting the periodic bias. In the case we do not apply the correction of the periodic bias, this value does not appear in the experiment.

2.  $\tilde{t}$ : optimal shift (in days) between our estimate of  $R$  and the one obtained by EpiEstim.
3.  $\mathcal{S}(\hat{i})$ : RMSE between our estimate of  $R$  and the one obtained by EpiEstim shifted back  $\tilde{t}$  days.
4.  $R_{t_c}^i$ : last available value of the EpiEstim estimate  $R_t^i$ .
5.  $R_{t_c}$ : last available value of our  $R_t$  estimate.

The default value for the regularization parameter is  $w = 5$  for  $F \equiv F_1$  and  $w = 5.5$  for  $F \equiv F_2$ , otherwise it is explicitly written in the experiment.

In general the correction of the weekly periodic bias works quite well. We can highlight the following regions where such correction works extremely well: Germany ( $\mathcal{I} = 0.166$ ), Croatia ( $\mathcal{I} = 0.174$ ), Sweden ( $\mathcal{I} = 0.192$ ), Switzerland ( $\mathcal{I} = 0.206$ ), Poland ( $\mathcal{I} = 0.227$ ), Portugal ( $\mathcal{I} = 0.23$ ), and Utah ( $\mathcal{I} = 0.292$ ). On the other side, there is also a number of regions where the correction of the weekly bias does not work well as Uruguay ( $\mathcal{I} = 0.822$ ), China ( $\mathcal{I} = 0.826$ ), Peru ( $\mathcal{I} = 0.83$ ), Ethiopia ( $\mathcal{I} = 0.831$ ), Indonesia ( $\mathcal{I} = 0.89$ ), Cuba ( $\mathcal{I} = 0.928$ ), Cyprus ( $\mathcal{I} = 0.94$ ), Washington ( $\mathcal{I} = 0.816$ ), New York ( $\mathcal{I} = 0.86$ ) and Connecticut ( $\mathcal{I} = 0.936$ ).

For some regions where the value of  $\mathcal{S}(\hat{i})$  is high, we repeat the experiment without correcting the weekly periodic bias. In general, in such cases we observe that profile of the  $R_t$  estimate is similar in both cases and the experimental variability is lower (or similar) in the case of using the bias correction. That is the

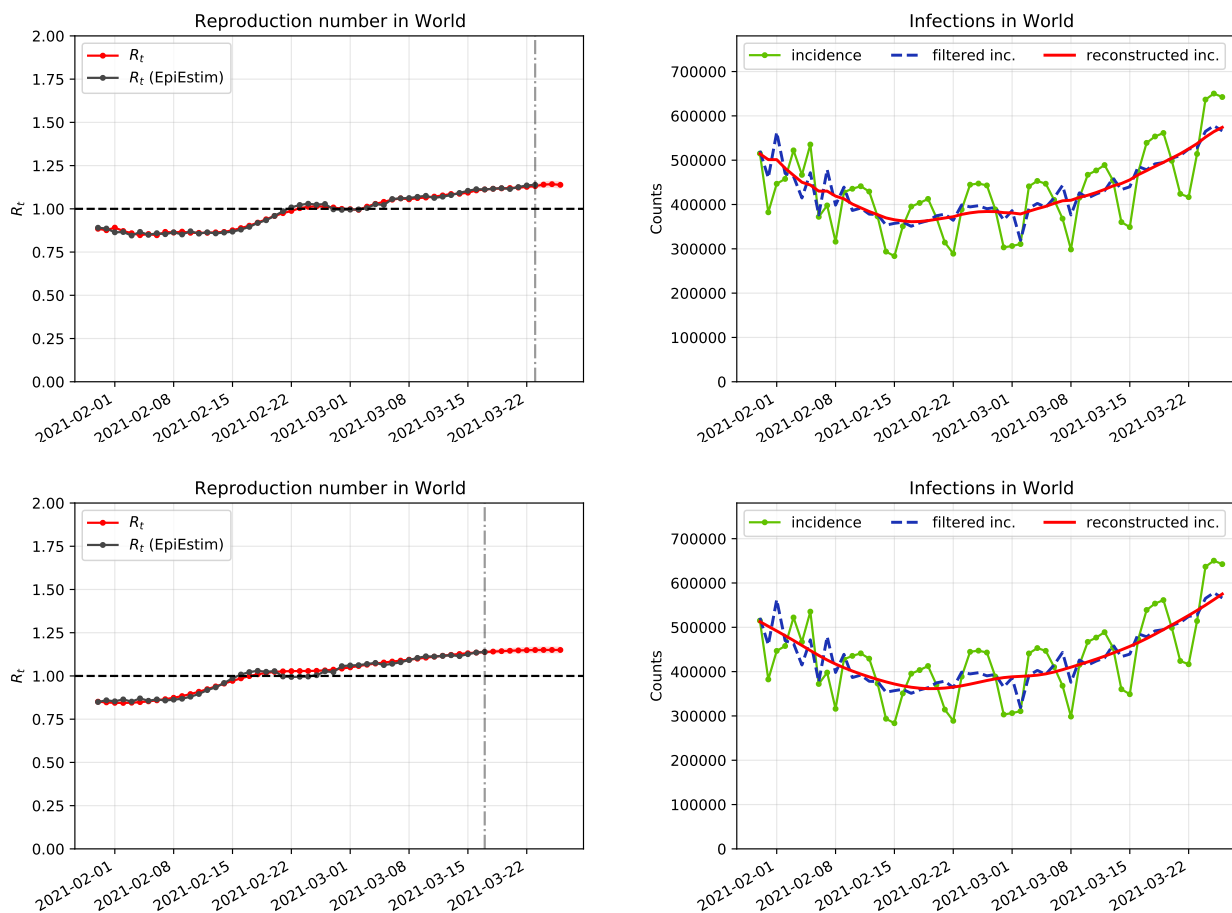

**Fig. S1.** Results obtained for the world population up to March 26, 2021 using: (top)  $F \equiv F_1$  and (down)  $F \equiv F_2$ .

|               | World | World | France | France | Spain | Spain | USA   | USA   | Cuba  | Cuba  |
|---------------|-------|-------|--------|--------|-------|-------|-------|-------|-------|-------|
| $F$           | $F_1$ | $F_2$ | $F_1$  | $F_2$  | $F_1$ | $F_2$ | $F_1$ | $F_2$ | $F_1$ | $F_2$ |
| $\hat{t}$     | 2.72  | 8.94  | 3.50   | 9.05   | 3.38  | 9.70  | 2.72  | 8.76  | 3.09  | 8.00  |
| $S(\hat{t})$  | 0.010 | 0.014 | 0.026  | 0.025  | 0.025 | 0.046 | 0.014 | 0.023 | 0.034 | 0.041 |
| $\mathcal{I}$ | 0.337 | 0.380 | 0.481  | 0.513  | 0.171 | 0.290 | 0.450 | 0.569 | 0.890 | 0.928 |
| $q_1$         | 1.011 | 1.012 | 0.931  | 0.932  | 1.263 | 1.266 | 1.008 | 1.005 | 1.005 | 1.006 |
| $q_2$         | 1.204 | 1.204 | 1.073  | 1.078  | 1.227 | 1.208 | 1.262 | 1.250 | 0.945 | 0.945 |
| $q_3$         | 1.260 | 1.259 | 3.201  | 3.180  | 1.177 | 1.149 | 1.095 | 1.083 | 1.049 | 1.049 |
| $q_4$         | 1.027 | 1.026 | 1.062  | 1.062  | 1.031 | 1.009 | 1.053 | 1.057 | 0.923 | 0.921 |
| $q_5$         | 0.887 | 0.888 | 0.698  | 0.691  | 0.857 | 0.858 | 0.925 | 0.936 | 1.025 | 1.025 |
| $q_6$         | 0.888 | 0.889 | 0.889  | 0.886  | 0.802 | 0.817 | 0.909 | 0.915 | 1.037 | 1.037 |
| $q_7$         | 0.881 | 0.881 | 0.944  | 0.955  | 0.834 | 0.863 | 0.867 | 0.869 | 1.026 | 1.027 |

**Table S1.** Numerical results obtained by EpiInvert for the world population, France, Spain, the USA and Cuba using the data up to March 26, 2021 and the renewal equations  $F = F_1$  and  $F = F_2$ .

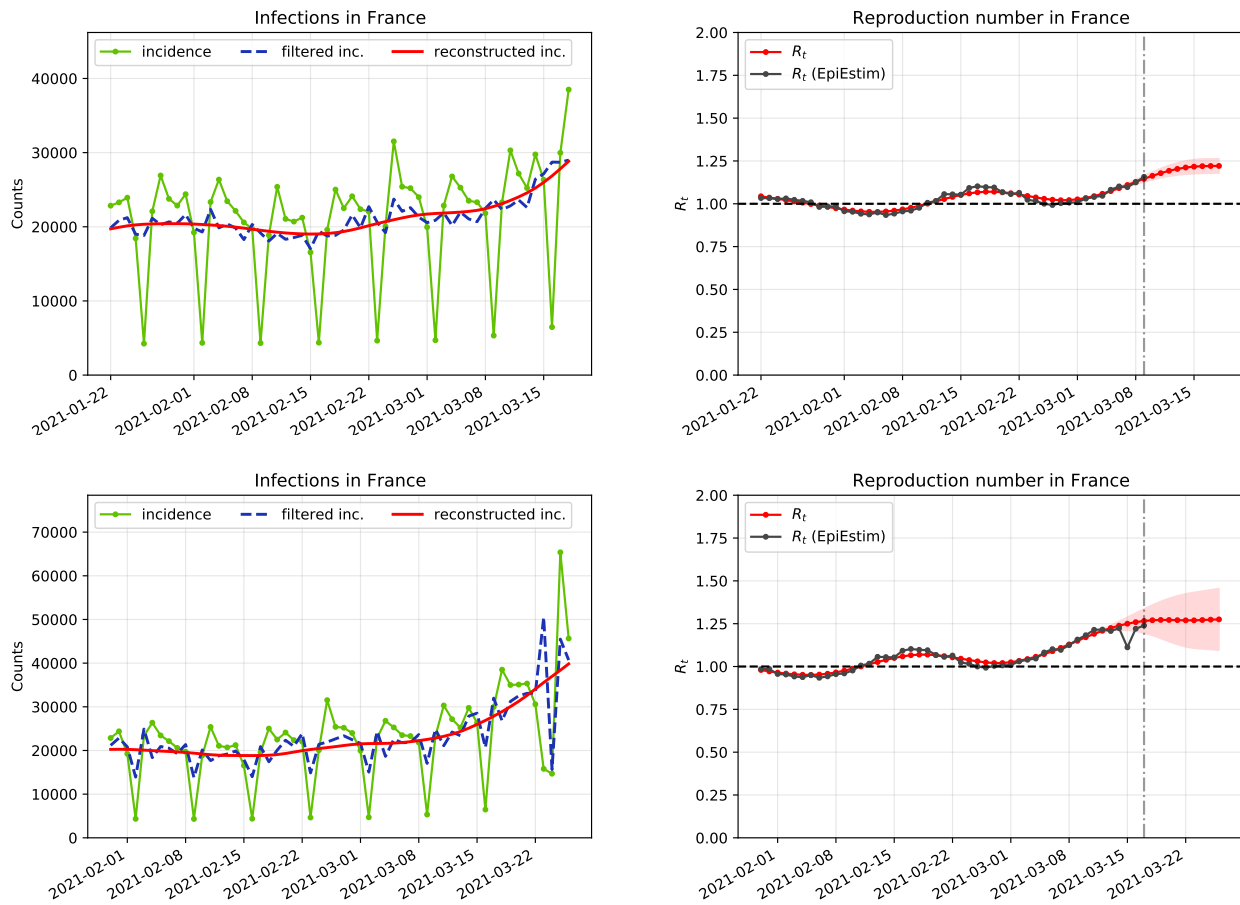

**Fig. S2.** Comparison of the EpiEstim estimate of  $R(t)$  in France by March 26 ( $R(t) = 1.239$ ) and the EpiInvert estimate 8 days in advance ( $R(t) = 1.221$ ). Notice the singularity observed in the EpiEstim estimate by March 15.



772 case of Canada, China, Cuba, Cyprus, Ethiopia, Peru, New  
773 York or Washington. In the case of Denmark, both estimations  
774 of  $R_t$  are quite different and the experimental variability are  
775 very high due to some high oscillations of the incidence curve  
776 in the last days of the sequence.

777 A very special case is Kansas. As can be observed in Fig.  
778 S21, although the correction of the weekly periodic bias is not  
779 bad ( $\mathcal{I} = 0.595$ ) the obtained  $R_t$  estimate is very inaccurate.  
780 The reason is that the incidence curve of Kansas is extremely  
781 oscillating ( $\mathcal{V}(i) = 1.728$  (notice that in the USA  $\mathcal{V}(i) = 0.130$ ))  
782 but the oscillations are not 7-day periodic and the correction  
783 of the weekly periodic bias produces high distortions of the  
784 incidence curve when we approach the last day of the sequence.  
785 In this very particular case it is clearly better to do not use the  
786 correction of the weekly bias. Moreover, due to the extremely  
787 oscillating behaviour of the incidence curve, as shown in the  
788 experiments of Fig. S21 a high value of the regularization  
789 parameter ( $w = 40$ ) is required in order to properly regularize  
790 the estimate of  $R_t$ .

791 Concerning the agreement with EpiEstim we observe that  
792 countries with small oscillations in the incidence curve like Iran  
793 ( $\mathcal{V}(i) = 0.023$ ) or Russia ( $\mathcal{V}(i) = 0.031$ ) show excellent agree-  
794 ment with EpiEstim ( $\mathcal{S}(\hat{t}) = 0.006$  for Iran and  $\mathcal{S}(\hat{t}) = 0.01$   
795 for Russia). On the other hand, countries with small number  
796 of cases like China have no good agreement with EpiEstim  
797 ( $\mathcal{S}(\hat{t}) = 0.142$ ) with the default value of the regularization  
798 parameter  $w$ . In such cases our  $R_t$  estimate is much more  
799 regular than the one of EpiEstim.

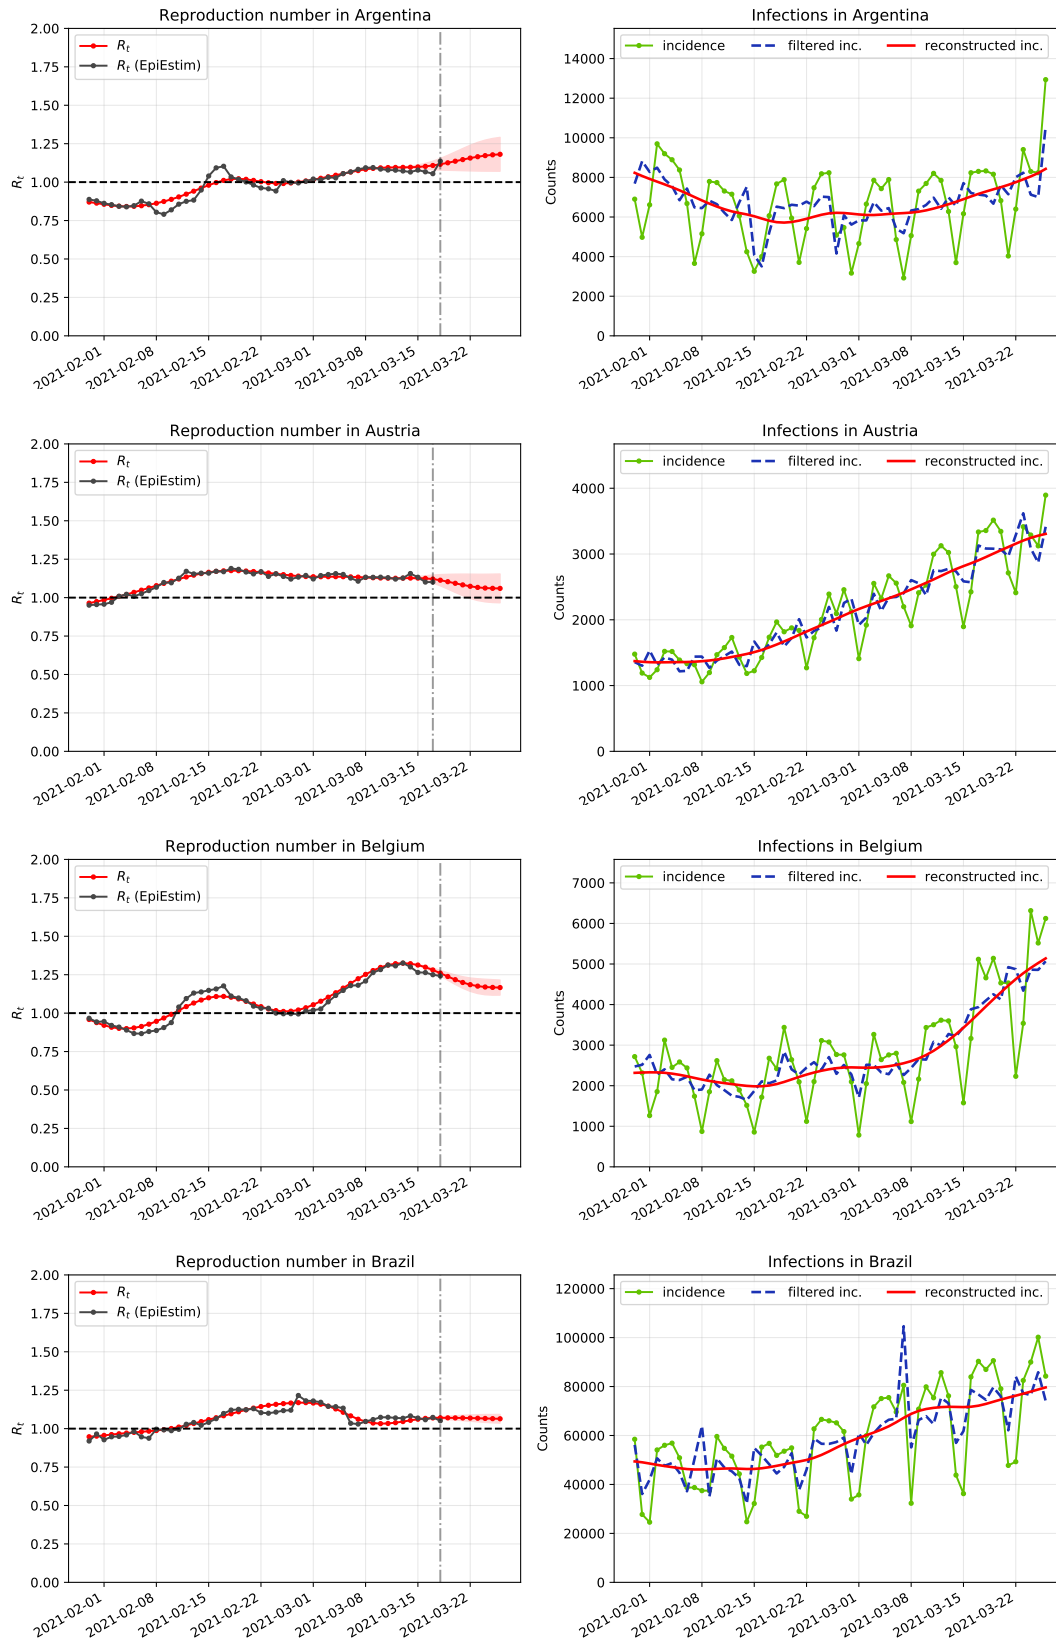

**Fig. S3.** From top to down: Argentina ( $\mathcal{I} = 0.451$ ,  $\bar{t} = 8.11$ ,  $S(\bar{t}) = 0.033$ ,  $R^i(t_c) = 1.137$ ,  $R(t_c) = 1.181$ ), Austria ( $\mathcal{I} = 0.464$ ,  $\bar{t} = 9.37$ ,  $S(\bar{t}) = 0.014$ ,  $R^i(t_c) = 1.101$ ,  $R(t_c) = 1.060$ ), Belgium ( $\mathcal{I} = 0.293$ ,  $\bar{t} = 8.49$ ,  $S(\bar{t}) = 0.031$ ,  $R^i(t_c) = 1.242$ ,  $R(t_c) = 1.166$ ) and Brazil ( $\mathcal{I} = 0.560$ ,  $\bar{t} = 8.21$ ,  $S(\bar{t}) = 0.027$ ,  $R^i(t_c) = 1.051$ ,  $R(t_c) = 1.064$ ).

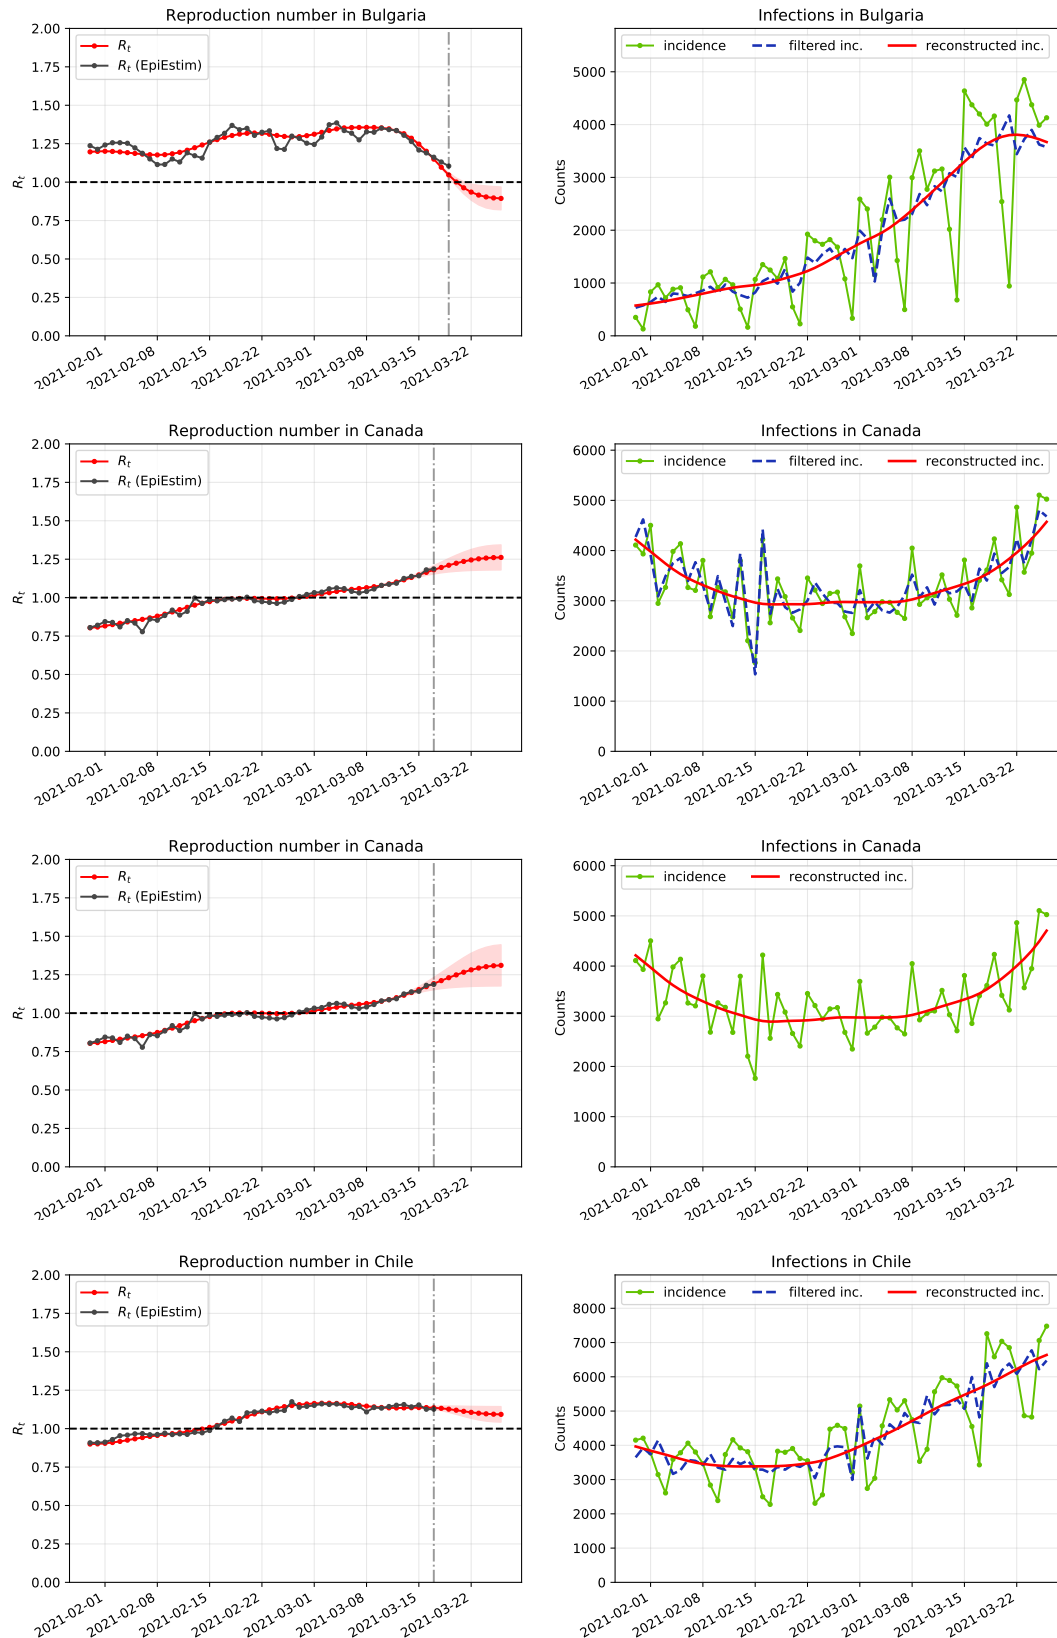

**Fig. S4.** From top to down: Bulgaria ( $\mathcal{I} = 0.245$ ,  $\bar{t} = 7.23$ ,  $S(\bar{t}) = 0.041$ ,  $R^i(t_c) = 1.105$ ,  $R(t_c) = 0.894$ ), Canada ( $\mathcal{I} = 0.780$ ,  $\bar{t} = 9.10$ ,  $S(\bar{t}) = 0.019$ ,  $R^i(t_c) = 1.187$ ,  $R(t_c) = 1.262$ ), Canada ( $\bar{t} = 9.07$ ,  $S(\bar{t}) = 0.019$ ,  $R^i(t_c) = 1.187$ ,  $R(t_c) = 1.311$ ) and Chile ( $\mathcal{I} = 0.385$ ,  $\bar{t} = 8.95$ ,  $S(\bar{t}) = 0.017$ ,  $R^i(t_c) = 1.127$ ,  $R(t_c) = 1.093$ ).

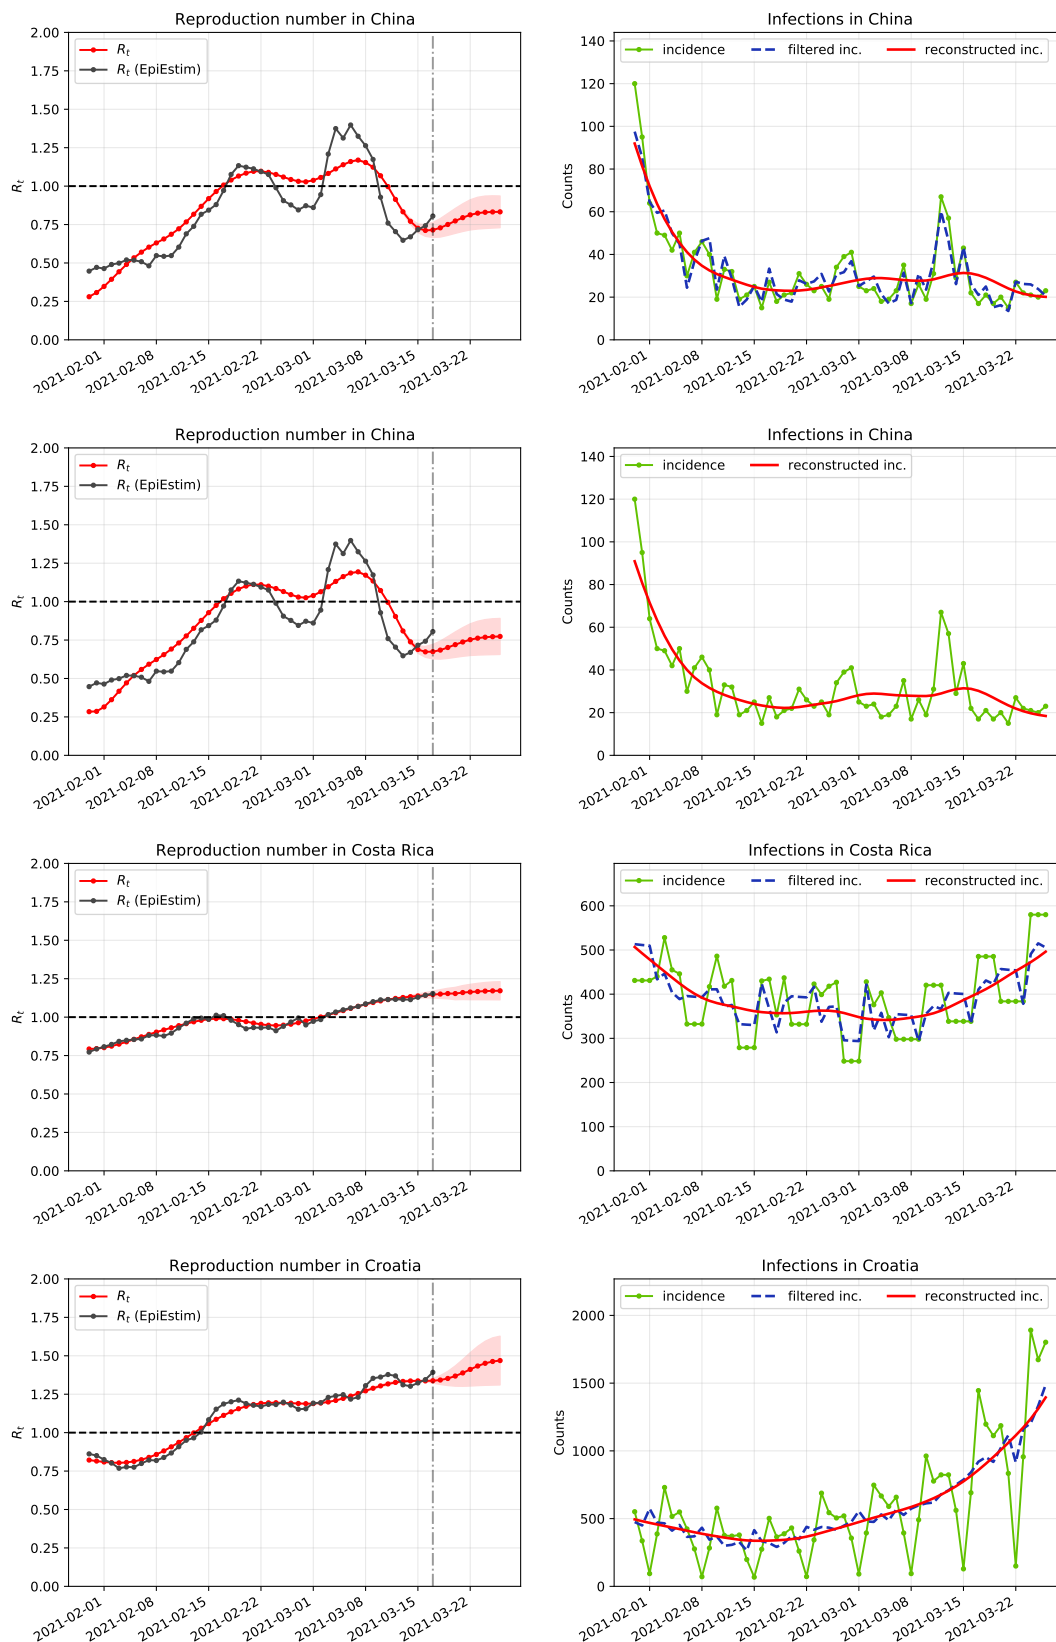

**Fig. S5.** From top to down: China ( $\mathcal{I} = 0.826$ ,  $\bar{t} = 9.30$ ,  $S(\bar{t}) = 0.142$ ,  $R^i(t_c) = 0.805$ ,  $R(t_c) = 0.833$ ), China ( $\bar{t} = 9.11$ ,  $S(\bar{t}) = 0.131$ ,  $R^i(t_c) = 0.805$ ,  $R(t_c) = 0.773$ ), Costa Rica ( $\mathcal{I} = 0.499$ ,  $\bar{t} = 8.97$ ,  $S(\bar{t}) = 0.018$ ,  $R^i(t_c) = 1.154$ ,  $R(t_c) = 1.172$ ) and Croatia ( $\mathcal{I} = 0.174$ ,  $\bar{t} = 8.88$ ,  $S(\bar{t}) = 0.033$ ,  $R^i(t_c) = 1.393$ ,  $R(t_c) = 1.469$ ).



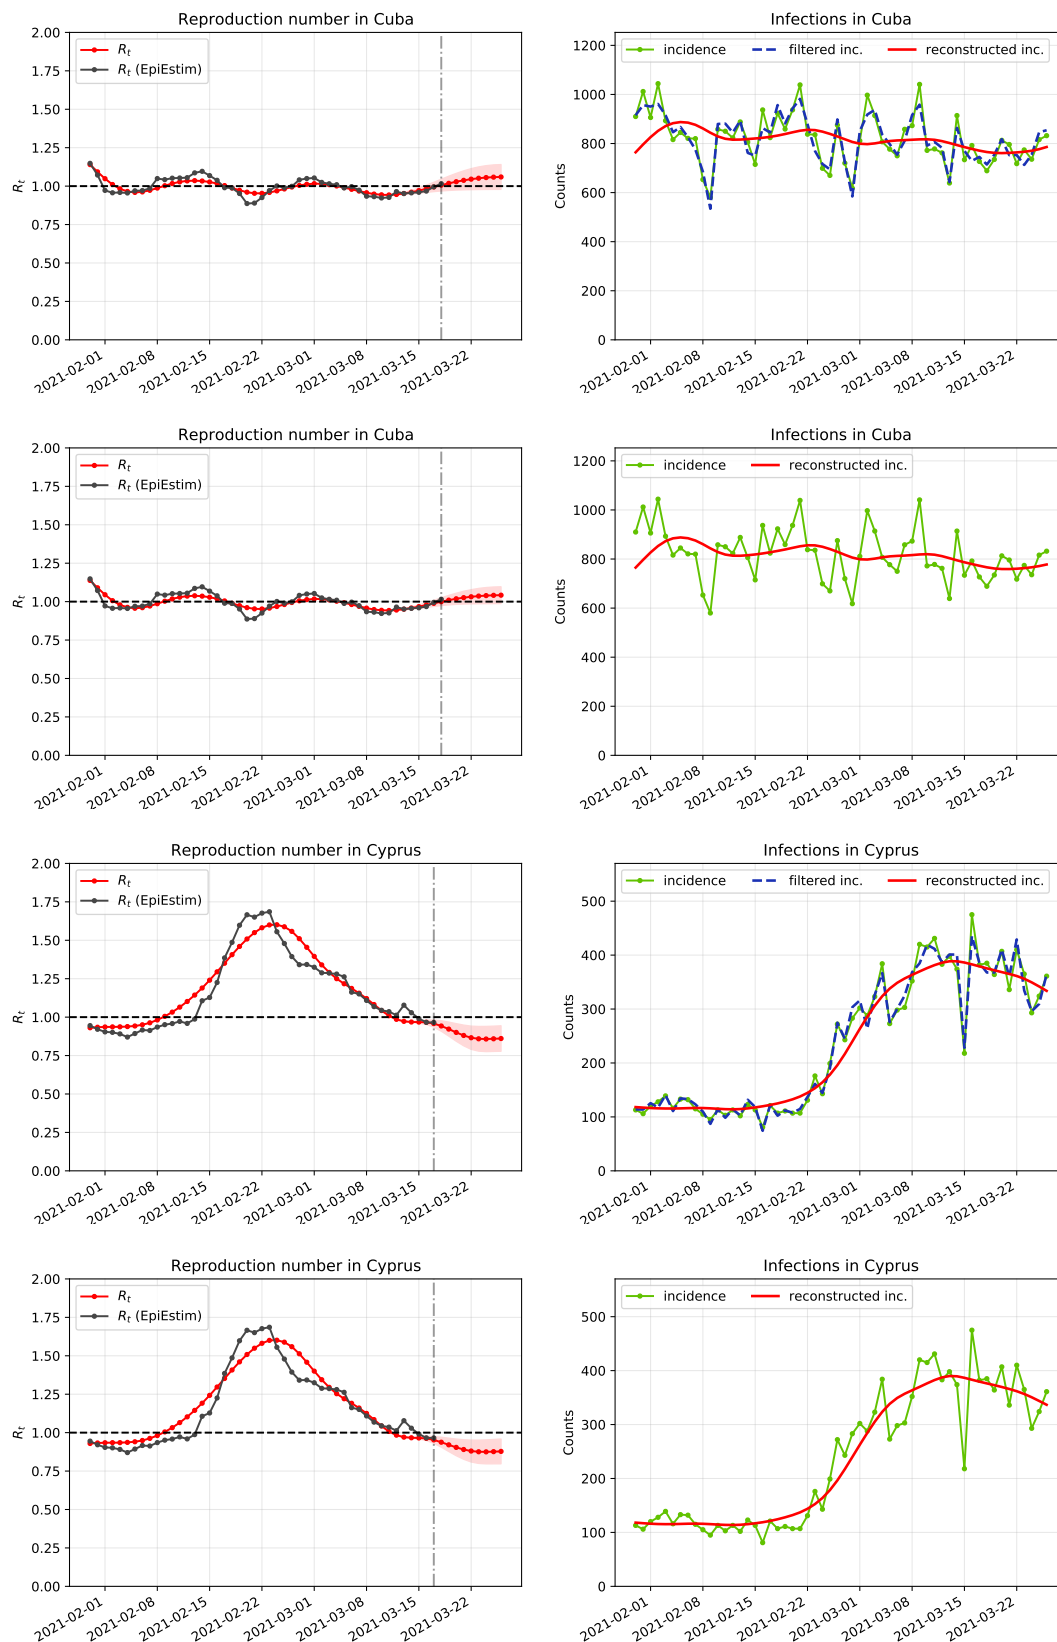

**Fig. S6.** From top to down: Cuba ( $\mathcal{I} = 0.928$ ,  $\bar{t} = 8.00$ ,  $S(\bar{t}) = 0.041$ ,  $R^i(t_c) = 1.016$ ,  $R(t_c) = 1.060$ ), Cuba ( $\bar{t} = 8.00$ ,  $S(\bar{t}) = 0.040$ ,  $R^i(t_c) = 1.016$ ,  $R(t_c) = 1.042$ ), Cyprus ( $\mathcal{I} = 0.940$ ,  $\bar{t} = 8.77$ ,  $S(\bar{t}) = 0.074$ ,  $R^i(t_c) = 0.965$ ,  $R(t_c) = 0.861$ ) and Cyprus ( $\bar{t} = 8.77$ ,  $S(\bar{t}) = 0.074$ ,  $R^i(t_c) = 0.965$ ,  $R(t_c) = 0.878$ ).

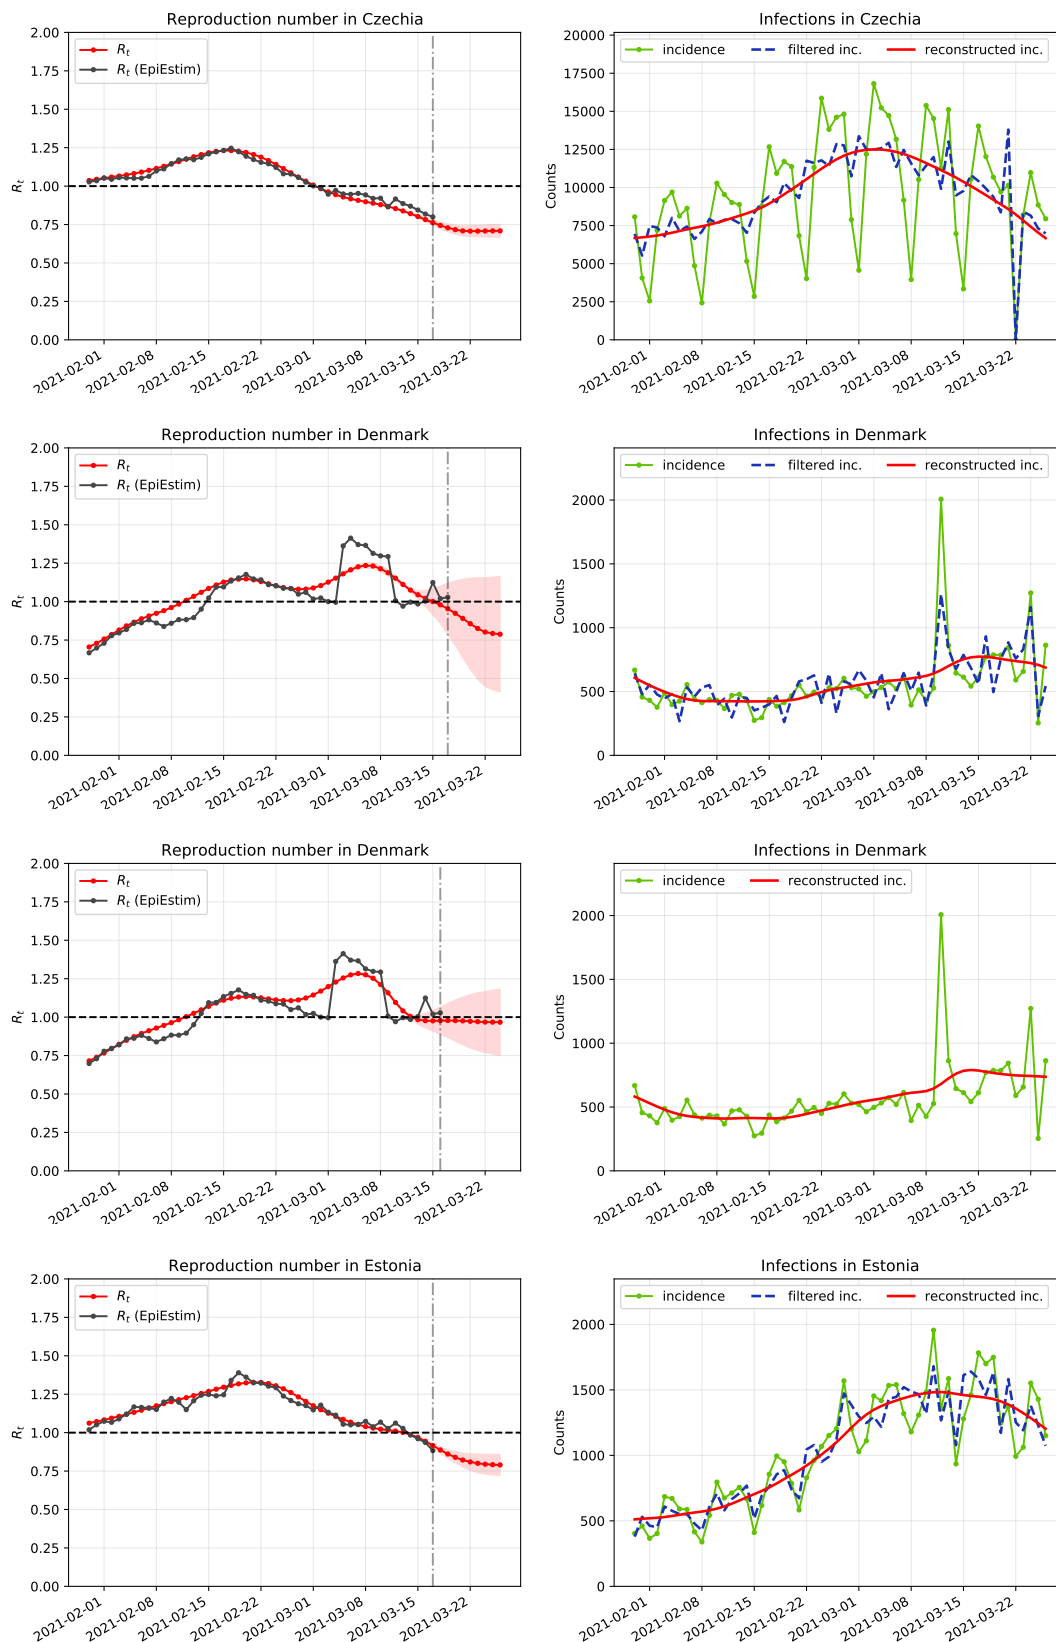

**Fig. S7.** From top to down: Czechia ( $\mathcal{I} = 0.433$ ,  $\bar{t} = 9.39$ ,  $S(\bar{t}) = 0.026$ ,  $R^i(t_c) = 0.795$ ,  $R(t_c) = 0.709$ ), Denmark ( $\mathcal{I} = 0.717$ ,  $\bar{t} = 7.42$ ,  $S(\bar{t}) = 0.080$ ,  $R^i(t_c) = 1.029$ ,  $R(t_c) = 0.788$ ) and Denmark ( $\bar{t} = 8.00$ ,  $S(\bar{t}) = 0.074$ ,  $R^i(t_c) = 1.029$ ,  $R(t_c) = 0.967$ ), Estonia ( $\mathcal{I} = 0.661$ ,  $\bar{t} = 8.81$ ,  $S(\bar{t}) = 0.029$ ,  $R^i(t_c) = 0.883$ ,  $R(t_c) = 0.790$ ).

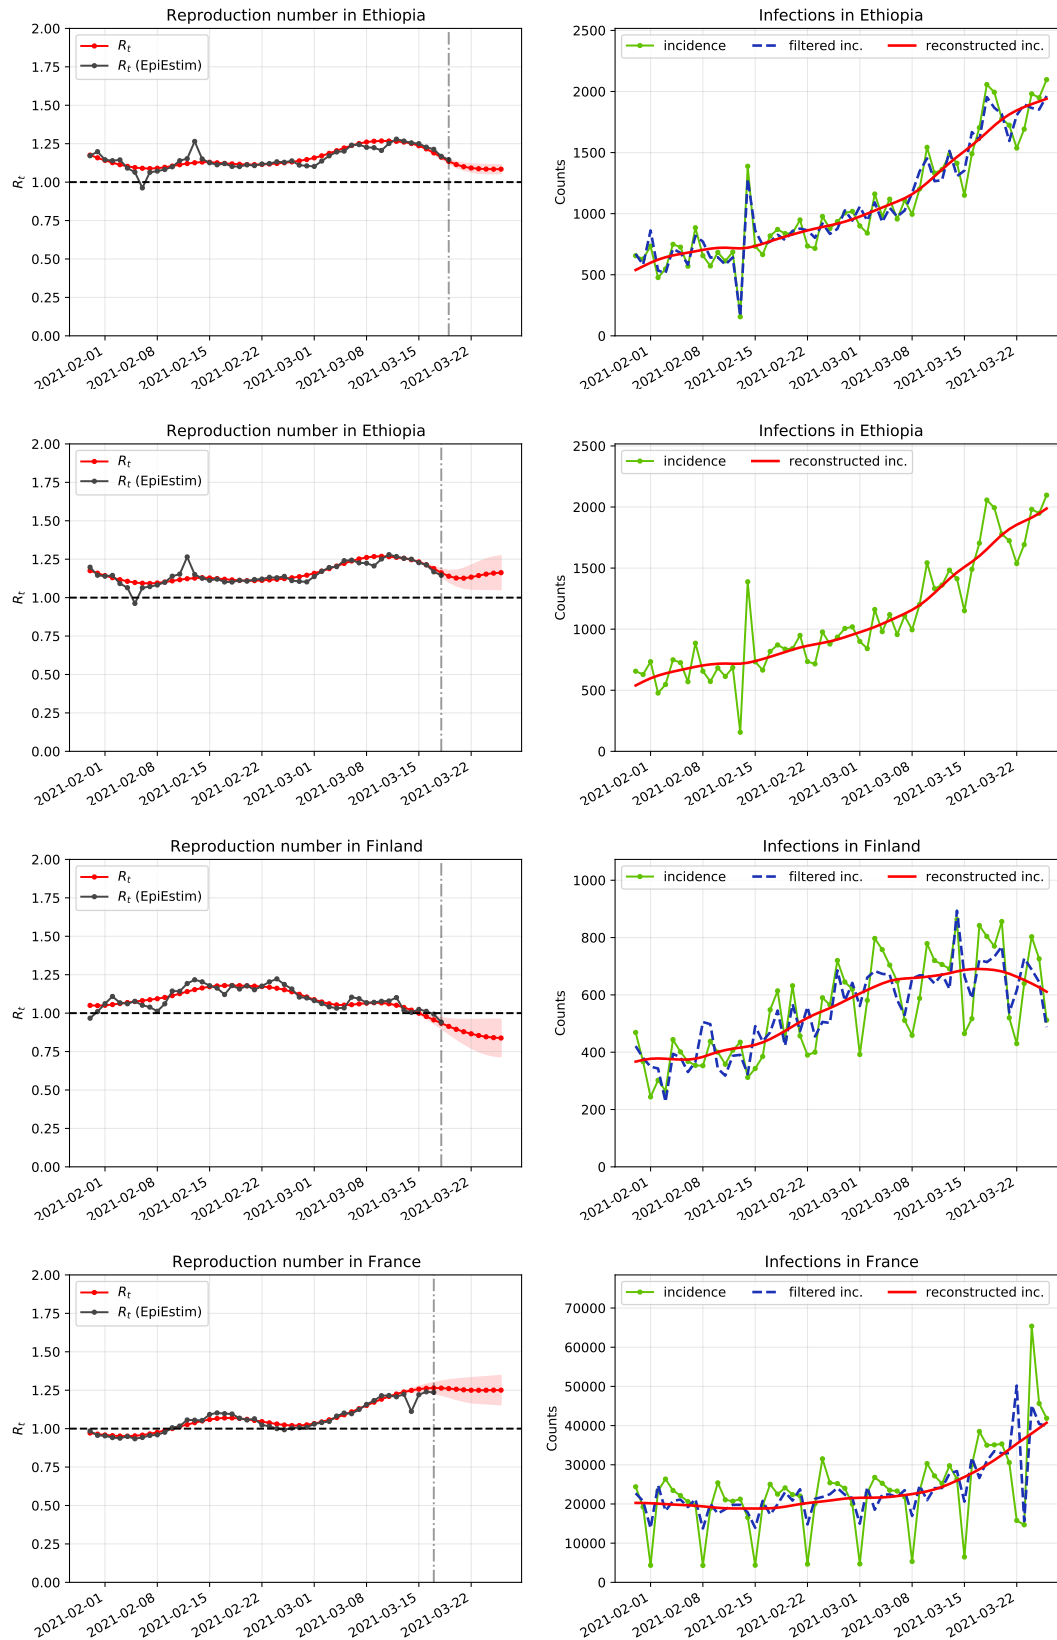

**Fig. S8.** From top to down: Ethiopia ( $\mathcal{I} = 0.831$ ,  $\bar{t} = 7.43$ ,  $S(\bar{t}) = 0.049$ ,  $R^i(t_c) = 1.146$ ,  $R(t_c) = 1.084$ ), Ethiopia ( $\bar{t} = 7.50$ ,  $S(\bar{t}) = 0.050$ ,  $R^i(t_c) = 1.146$ ,  $R(t_c) = 1.162$ ), Finland ( $\mathcal{I} = 0.630$ ,  $\bar{t} = 8.00$ ,  $S(\bar{t}) = 0.038$ ,  $R^i(t_c) = 0.941$ ,  $R(t_c) = 0.838$ ) and France ( $\mathcal{I} = 0.513$ ,  $\bar{t} = 9.05$ ,  $S(\bar{t}) = 0.025$ ,  $R^i(t_c) = 1.236$ ,  $R(t_c) = 1.251$ ).

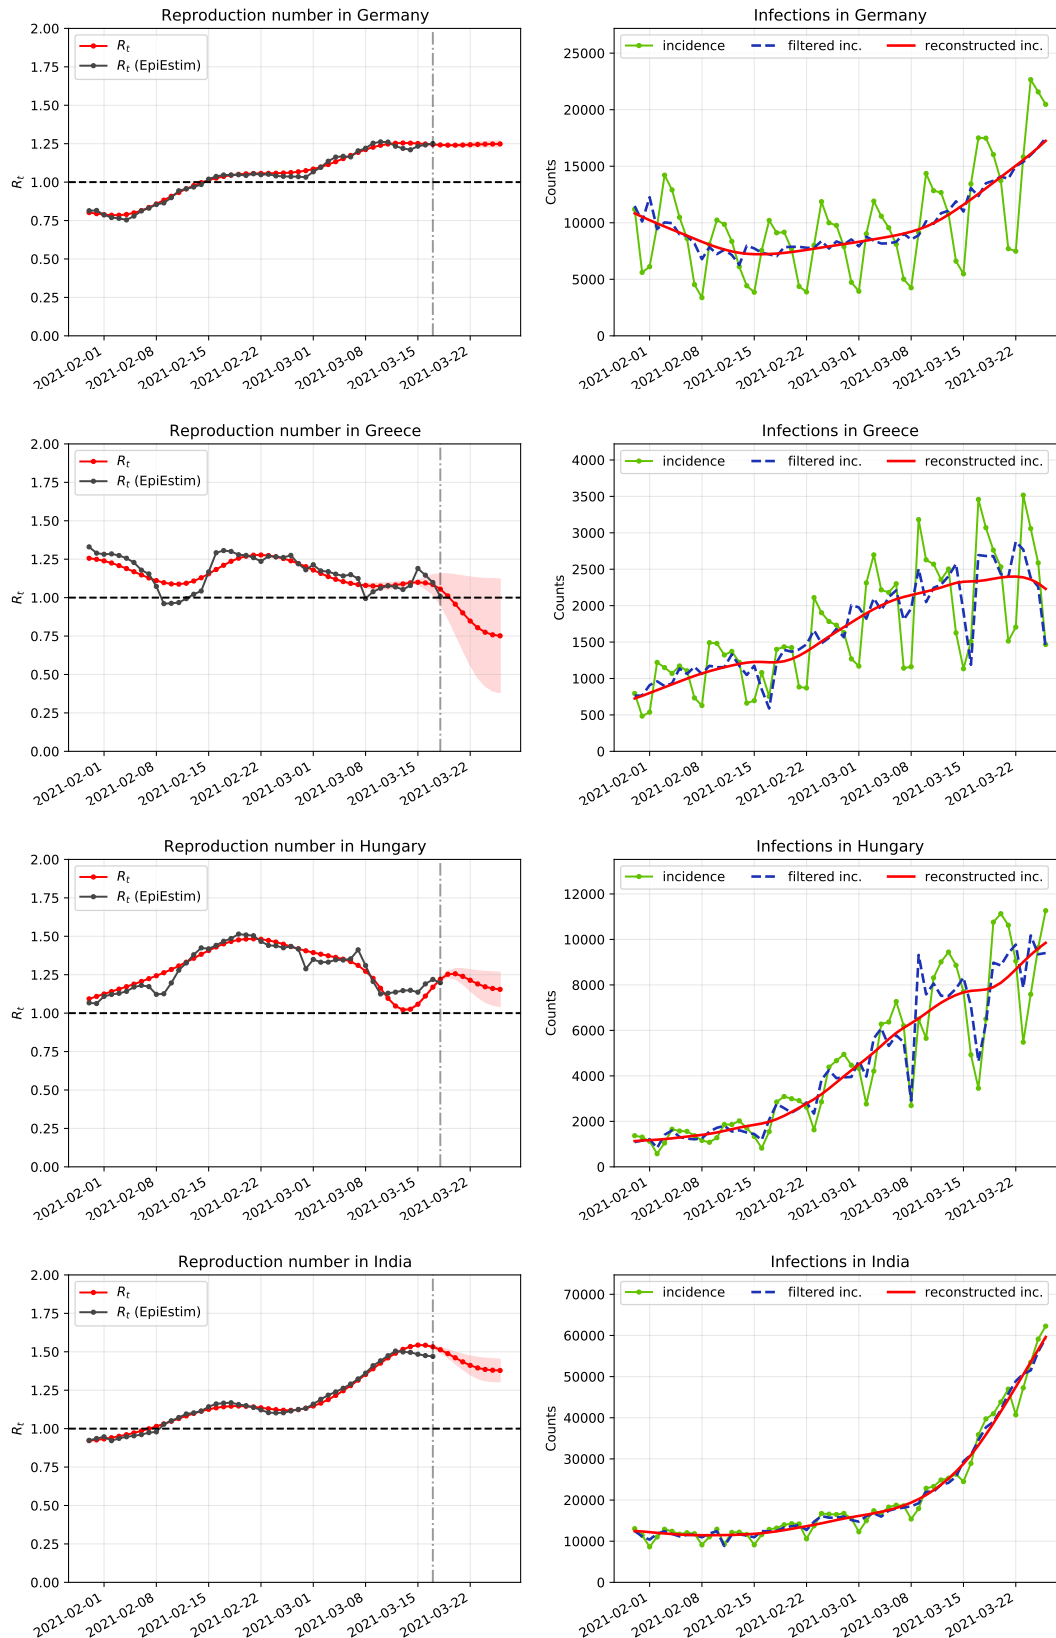

**Fig. S9.** From top to down: Germany ( $\mathcal{I} = 0.166$ ,  $\bar{t} = 9.00$ ,  $\mathcal{S}(\bar{t}) = 0.018$ ,  $R^i(t_c) = 1.251$ ,  $R(t_c) = 1.249$ ), Greece ( $\mathcal{I} = 0.507$ ,  $\bar{t} = 8.00$ ,  $\mathcal{S}(\bar{t}) = 0.061$ ,  $R^i(t_c) = 1.007$ ,  $R(t_c) = 0.752$ ), Hungary ( $\mathcal{I} = 0.644$ ,  $\bar{t} = 8.15$ ,  $\mathcal{S}(\bar{t}) = 0.052$ ,  $R^i(t_c) = 1.198$ ,  $R(t_c) = 1.155$ ) and India ( $\mathcal{I} = 0.434$ ,  $\bar{t} = 8.59$ ,  $\mathcal{S}(\bar{t}) = 0.022$ ,  $R^i(t_c) = 1.470$ ,  $R(t_c) = 1.378$ ).



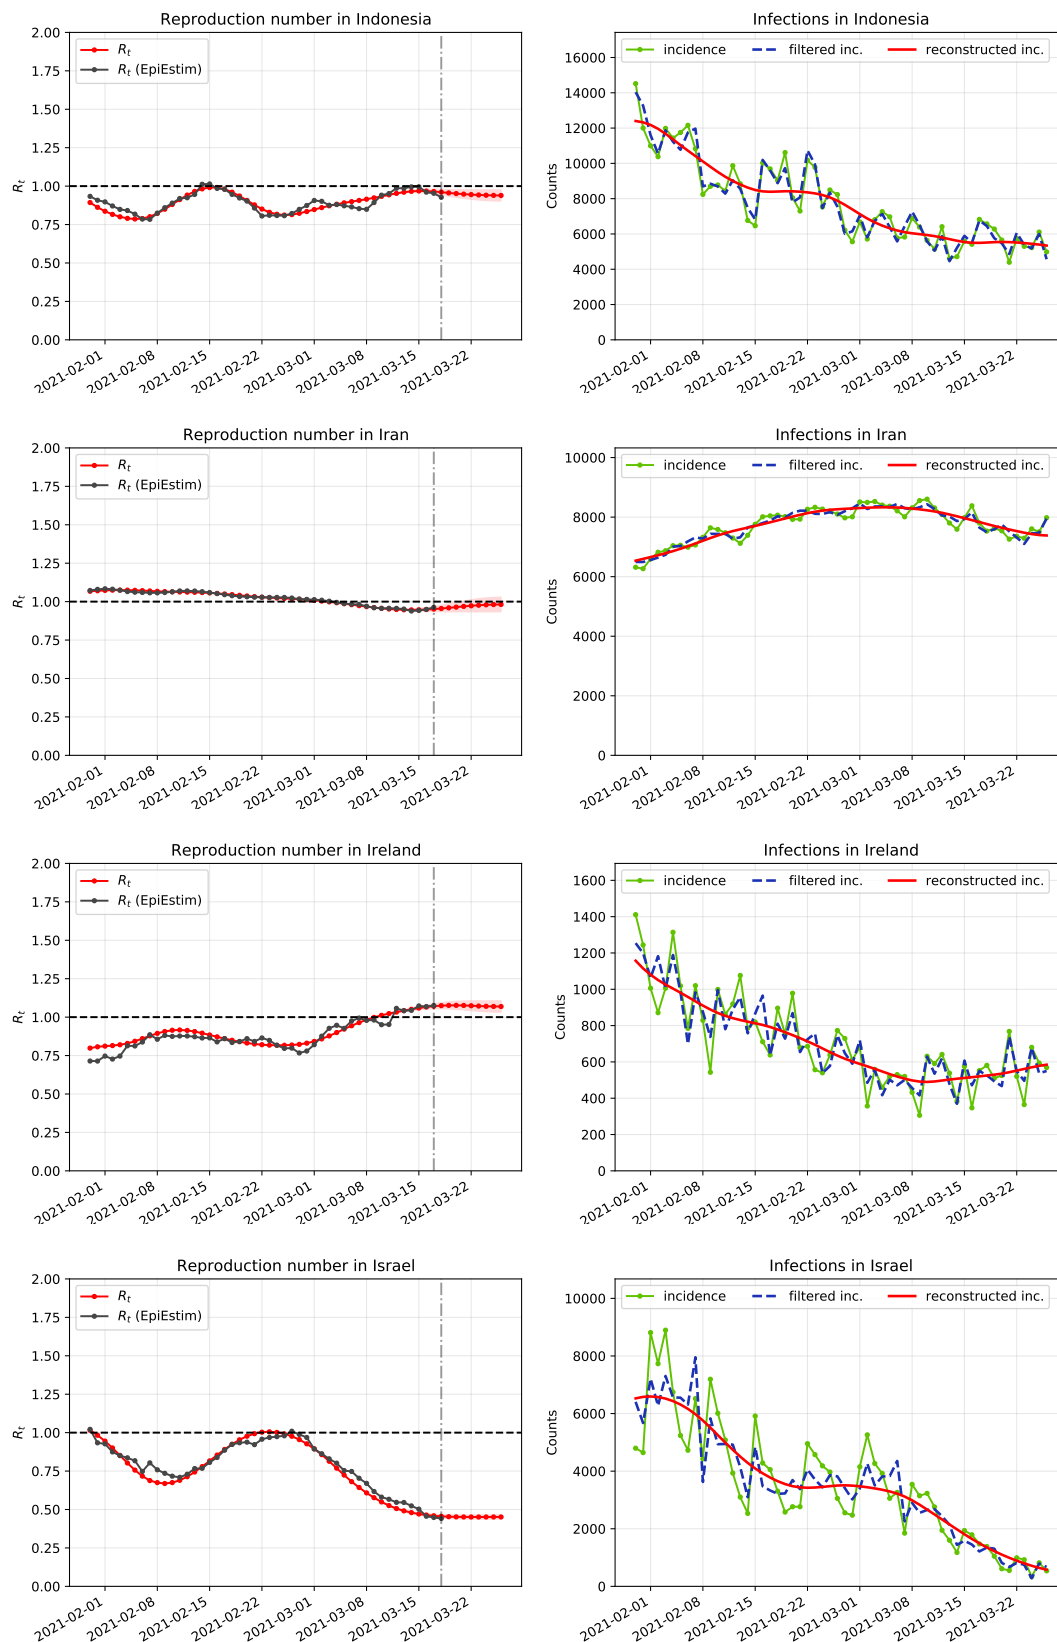

**Fig. S10.** From top to down: Indonesia ( $\mathcal{I} = 0.890$ ,  $\bar{t} = 8.18$ ,  $S(\bar{t}) = 0.029$ ,  $R^i(t_c) = 0.927$ ,  $R(t_c) = 0.939$ ), Iran ( $\mathcal{I} = 0.676$ ,  $\bar{t} = 9.11$ ,  $S(\bar{t}) = 0.006$ ,  $R^i(t_c) = 0.963$ ,  $R(t_c) = 0.982$ ), Ireland ( $\mathcal{I} = 0.730$ ,  $\bar{t} = 8.57$ ,  $S(\bar{t}) = 0.045$ ,  $R^i(t_c) = 1.075$ ,  $R(t_c) = 1.069$ ) and Israel ( $\mathcal{I} = 0.570$ ,  $\bar{t} = 8.45$ ,  $S(\bar{t}) = 0.042$ ,  $R^i(t_c) = 0.442$ ,  $R(t_c) = 0.451$ ).

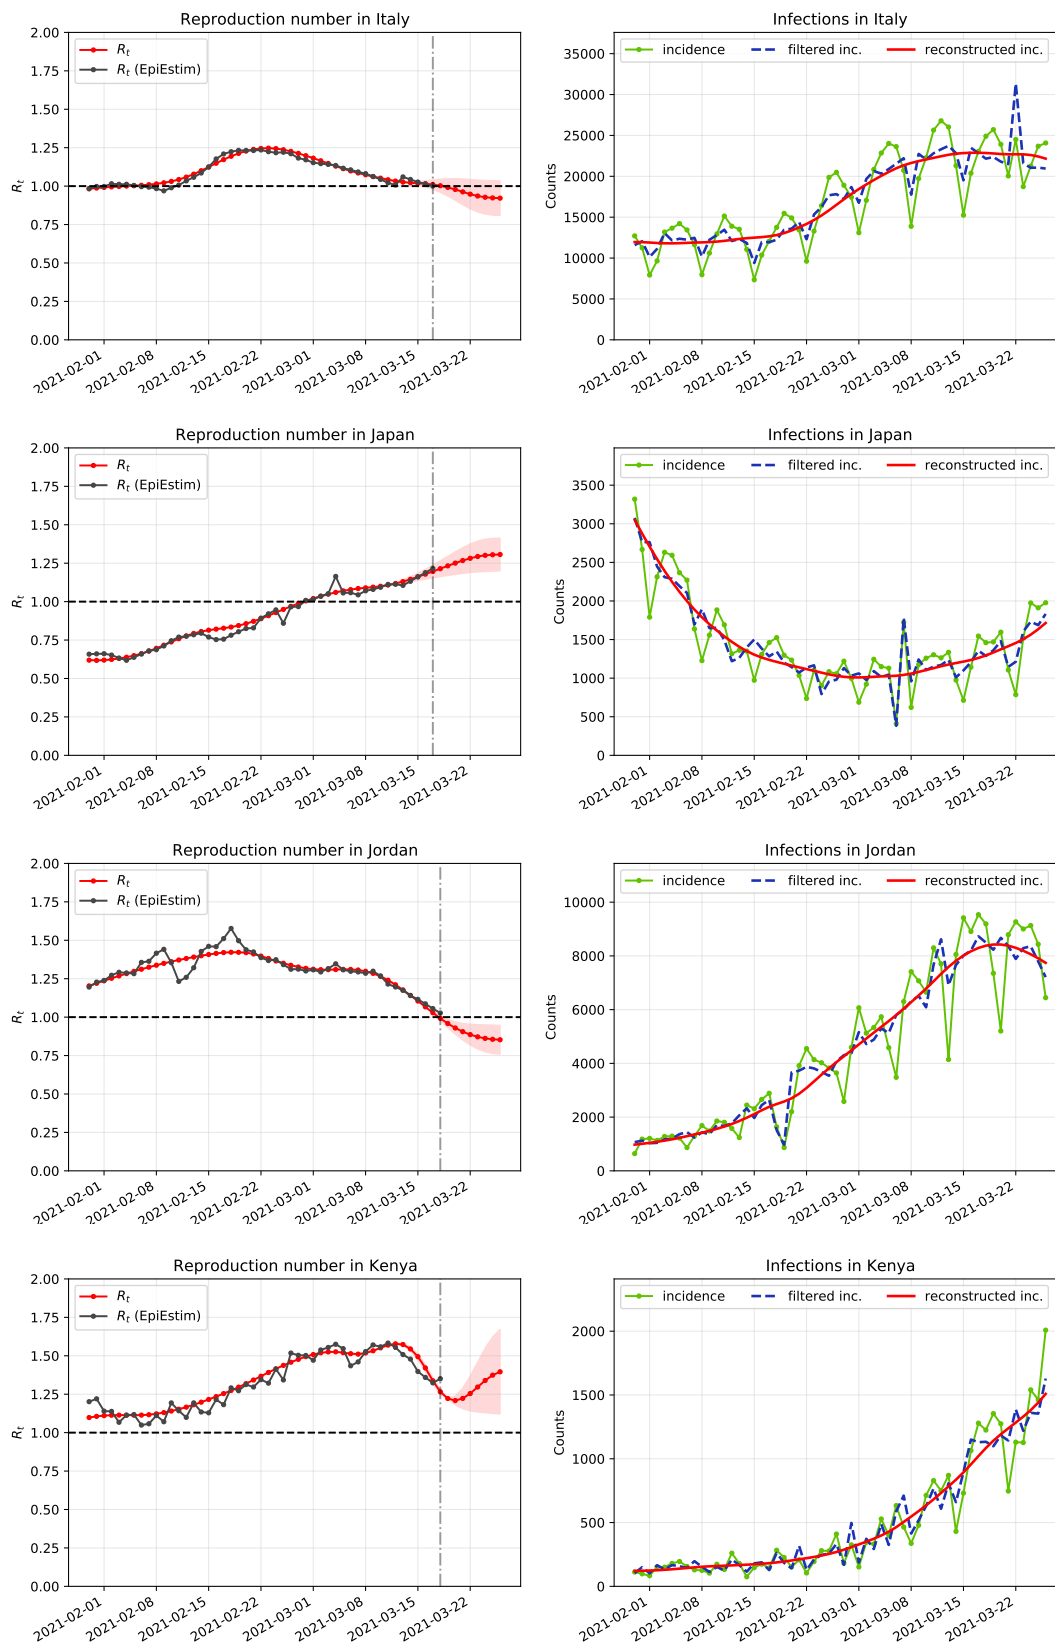

**Fig. S11.** From top to down: Italy ( $\mathcal{I} = 0.584$ ,  $\bar{t} = 8.74$ ,  $S(\bar{t}) = 0.020$ ,  $R^i(t_c) = 1.001$ ,  $R(t_c) = 0.922$ ), Japan ( $\mathcal{I} = 0.570$ ,  $\bar{t} = 8.93$ ,  $S(\bar{t}) = 0.041$ ,  $R^i(t_c) = 1.216$ ,  $R(t_c) = 1.307$ ), Jordan ( $\mathcal{I} = 0.437$ ,  $\bar{t} = 8.00$ ,  $S(\bar{t}) = 0.047$ ,  $R^i(t_c) = 1.027$ ,  $R(t_c) = 0.853$ ) and Kenya ( $\mathcal{I} = 0.574$ ,  $\bar{t} = 7.91$ ,  $S(\bar{t}) = 0.056$ ,  $R^i(t_c) = 1.351$ ,  $R(t_c) = 1.396$ ).

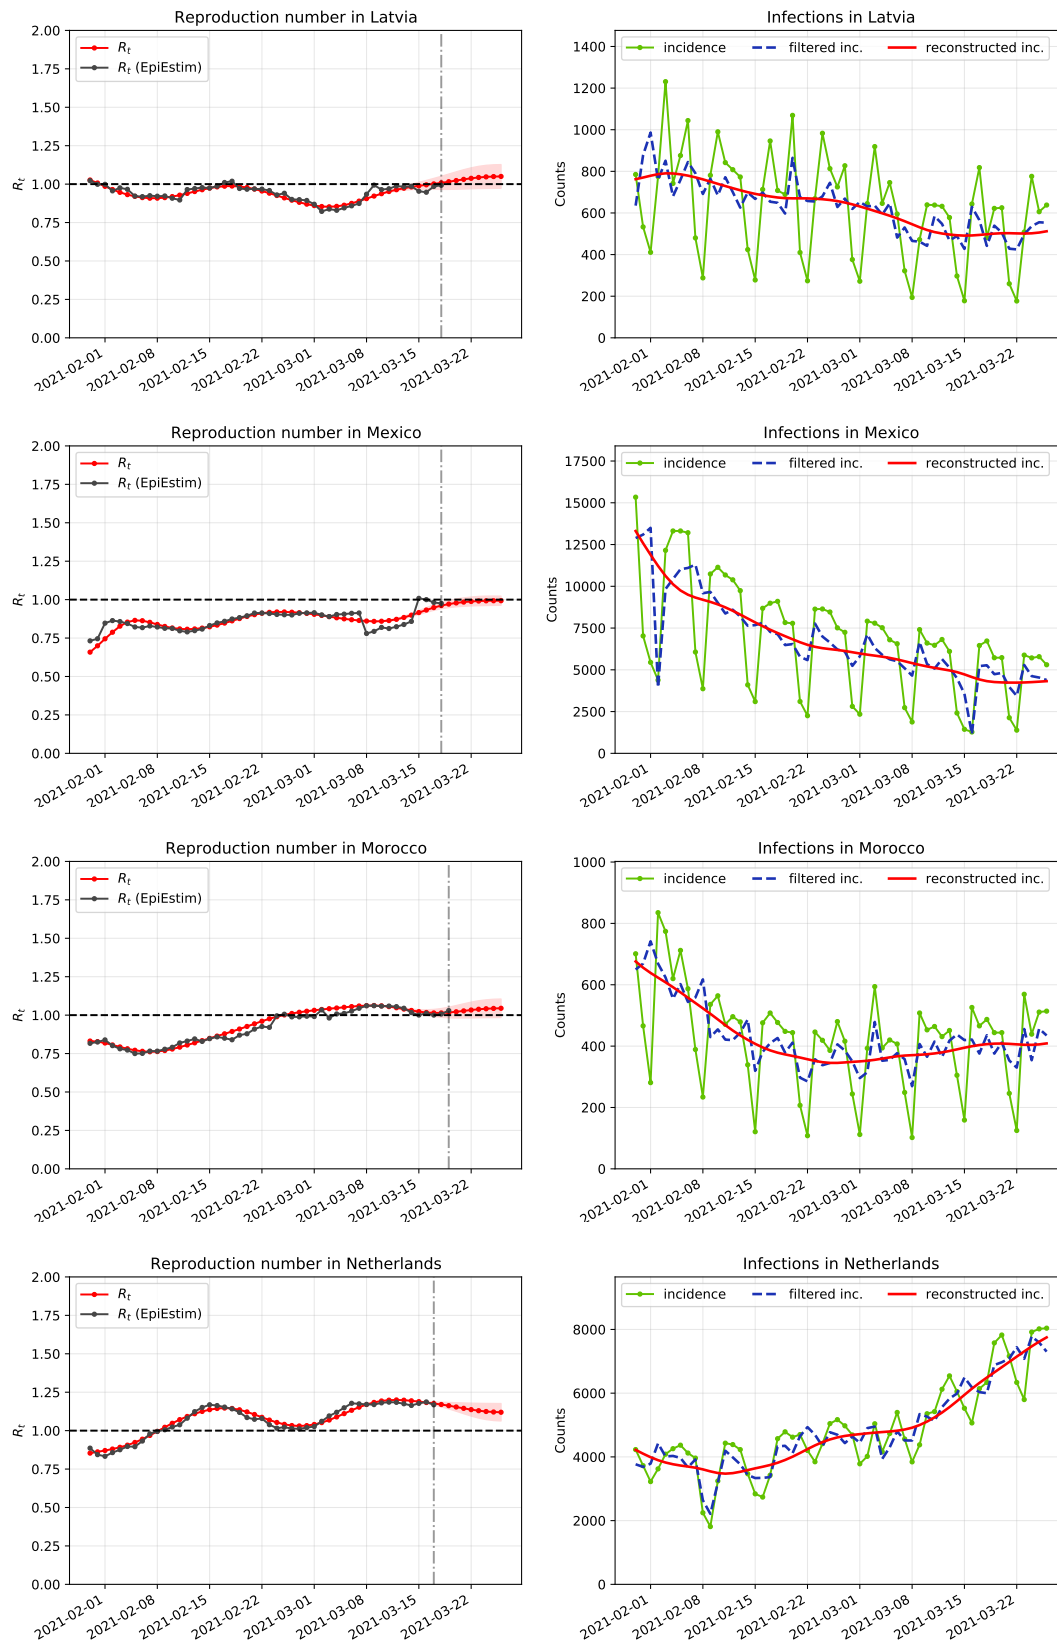

**Fig. S12.** From top to down: Latvia ( $\mathcal{I} = 0.299$ ,  $\bar{t} = 8.43$ ,  $S(\bar{t}) = 0.026$ ,  $R^i(t_c) = 0.993$ ,  $R(t_c) = 1.050$ ), Mexico ( $\mathcal{I} = 0.449$ ,  $\bar{t} = 8.46$ ,  $S(\bar{t}) = 0.051$ ,  $R^i(t_c) = 0.976$ ,  $R(t_c) = 0.993$ ), Morocco ( $\mathcal{I} = 0.329$ ,  $\bar{t} = 7.32$ ,  $S(\bar{t}) = 0.025$ ,  $R^i(t_c) = 1.030$ ,  $R(t_c) = 1.045$ ) and Netherlands ( $\mathcal{I} = 0.601$ ,  $\bar{t} = 8.55$ ,  $S(\bar{t}) = 0.023$ ,  $R^i(t_c) = 1.168$ ,  $R(t_c) = 1.120$ ).

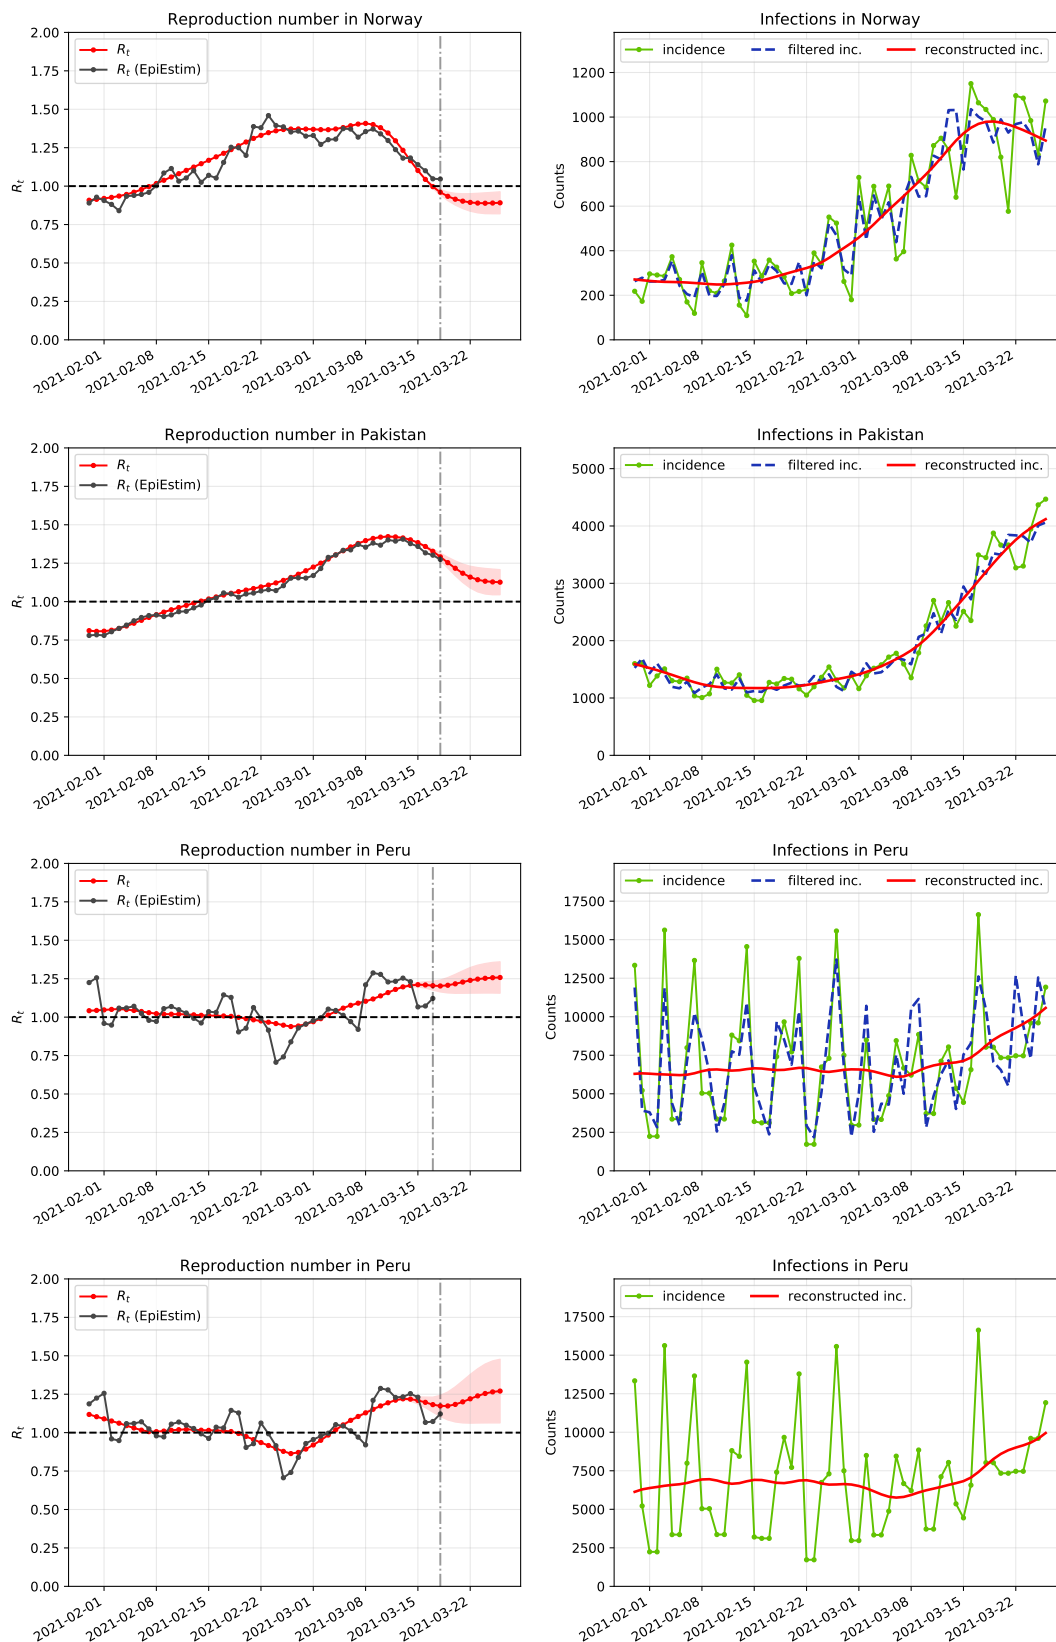

**Fig. S13.** From top to down: Norway ( $\mathcal{I} = 0.609$ ,  $\bar{t} = 8.48$ ,  $\mathcal{S}(\bar{t}) = 0.053$ ,  $R^i(t_c) = 1.046$ ,  $R(t_c) = 0.891$ ), Pakistan ( $\mathcal{I} = 0.557$ ,  $\bar{t} = 8.37$ ,  $\mathcal{S}(\bar{t}) = 0.027$ ,  $R^i(t_c) = 1.274$ ,  $R(t_c) = 1.127$ ), Peru ( $\mathcal{I} = 0.830$ ,  $\bar{t} = 8.68$ ,  $\mathcal{S}(\bar{t}) = 0.105$ ,  $R^i(t_c) = 1.122$ ,  $R(t_c) = 1.258$ ) and Peru ( $\bar{t} = 8.02$ ,  $\mathcal{S}(\bar{t}) = 0.088$ ,  $R^i(t_c) = 1.122$ ,  $R(t_c) = 1.270$ ).

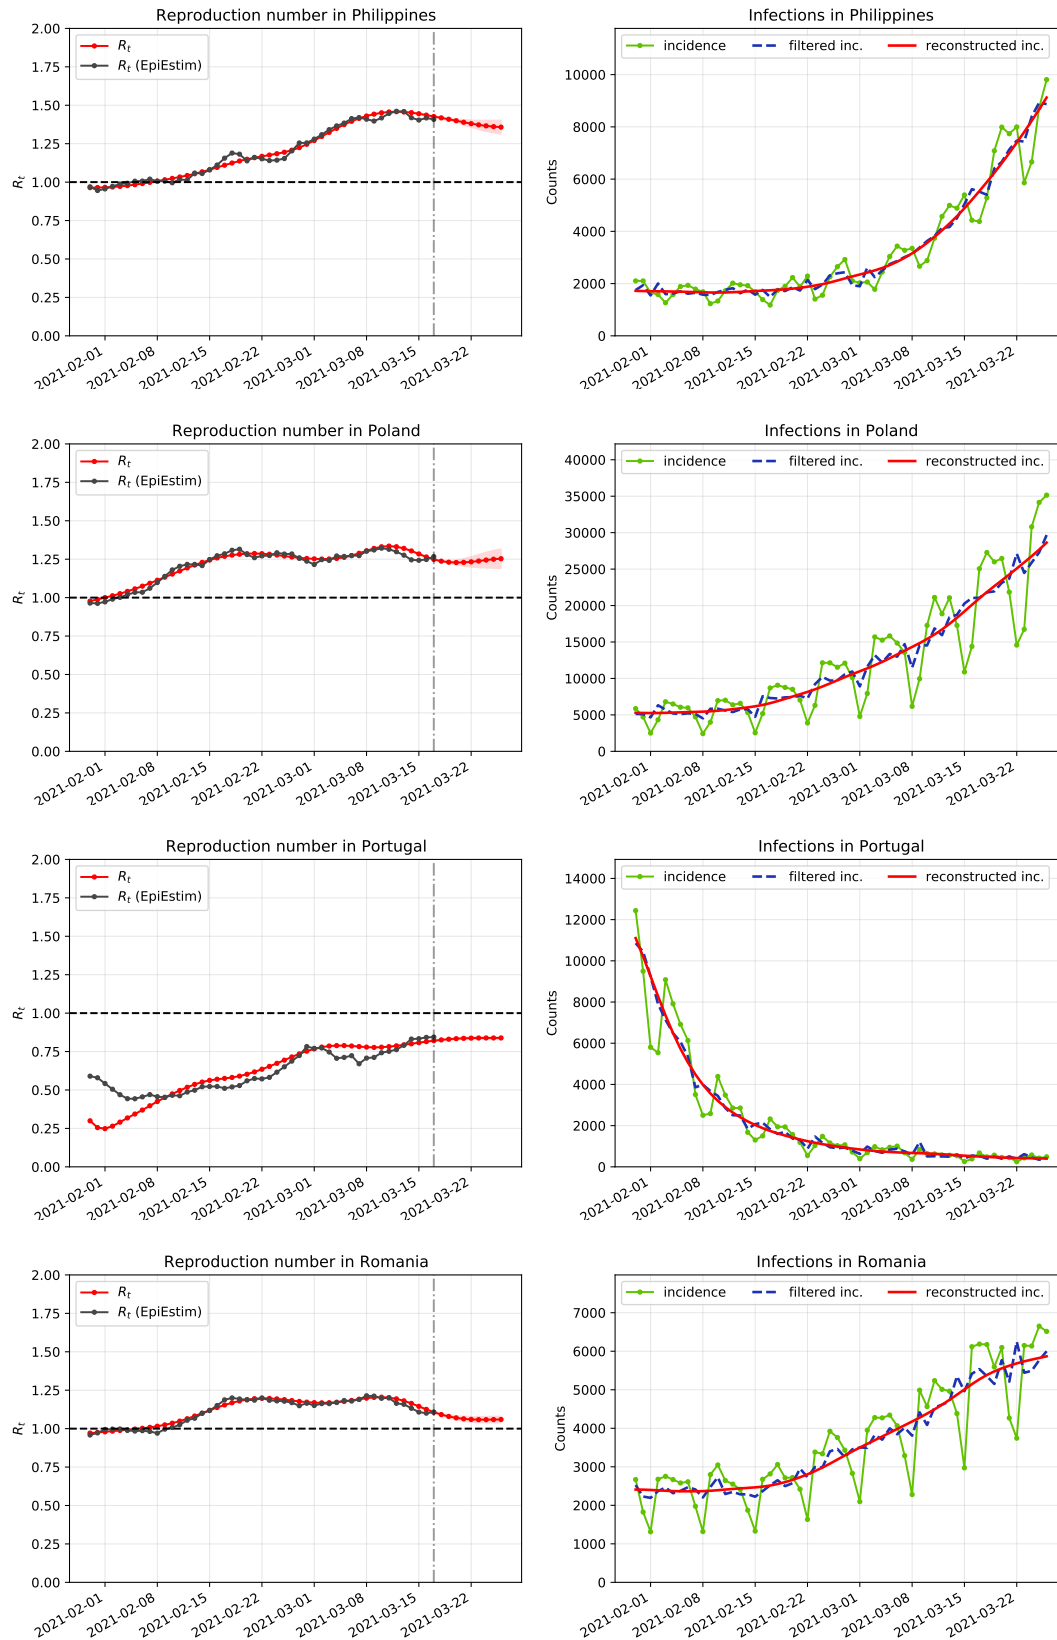

**Fig. S14.** From top to down: Philippines ( $\mathcal{I} = 0.313$ ,  $\bar{t} = 8.55$ ,  $\mathcal{S}(\bar{t}) = 0.026$ ,  $R^i(t_c) = 1.408$ ,  $R(t_c) = 1.358$ ), Poland ( $\mathcal{I} = 0.227$ ,  $\bar{t} = 8.77$ ,  $\mathcal{S}(\bar{t}) = 0.022$ ,  $R^i(t_c) = 1.267$ ,  $R(t_c) = 1.253$ ), Portugal ( $\mathcal{I} = 0.230$ ,  $\bar{t} = 9.49$ ,  $\mathcal{S}(\bar{t}) = 0.103$ ,  $R^i(t_c) = 0.844$ ,  $R(t_c) = 0.839$ ) and Romania ( $\mathcal{I} = 0.265$ ,  $\bar{t} = 8.57$ ,  $\mathcal{S}(\bar{t}) = 0.019$ ,  $R^i(t_c) = 1.107$ ,  $R(t_c) = 1.060$ ).



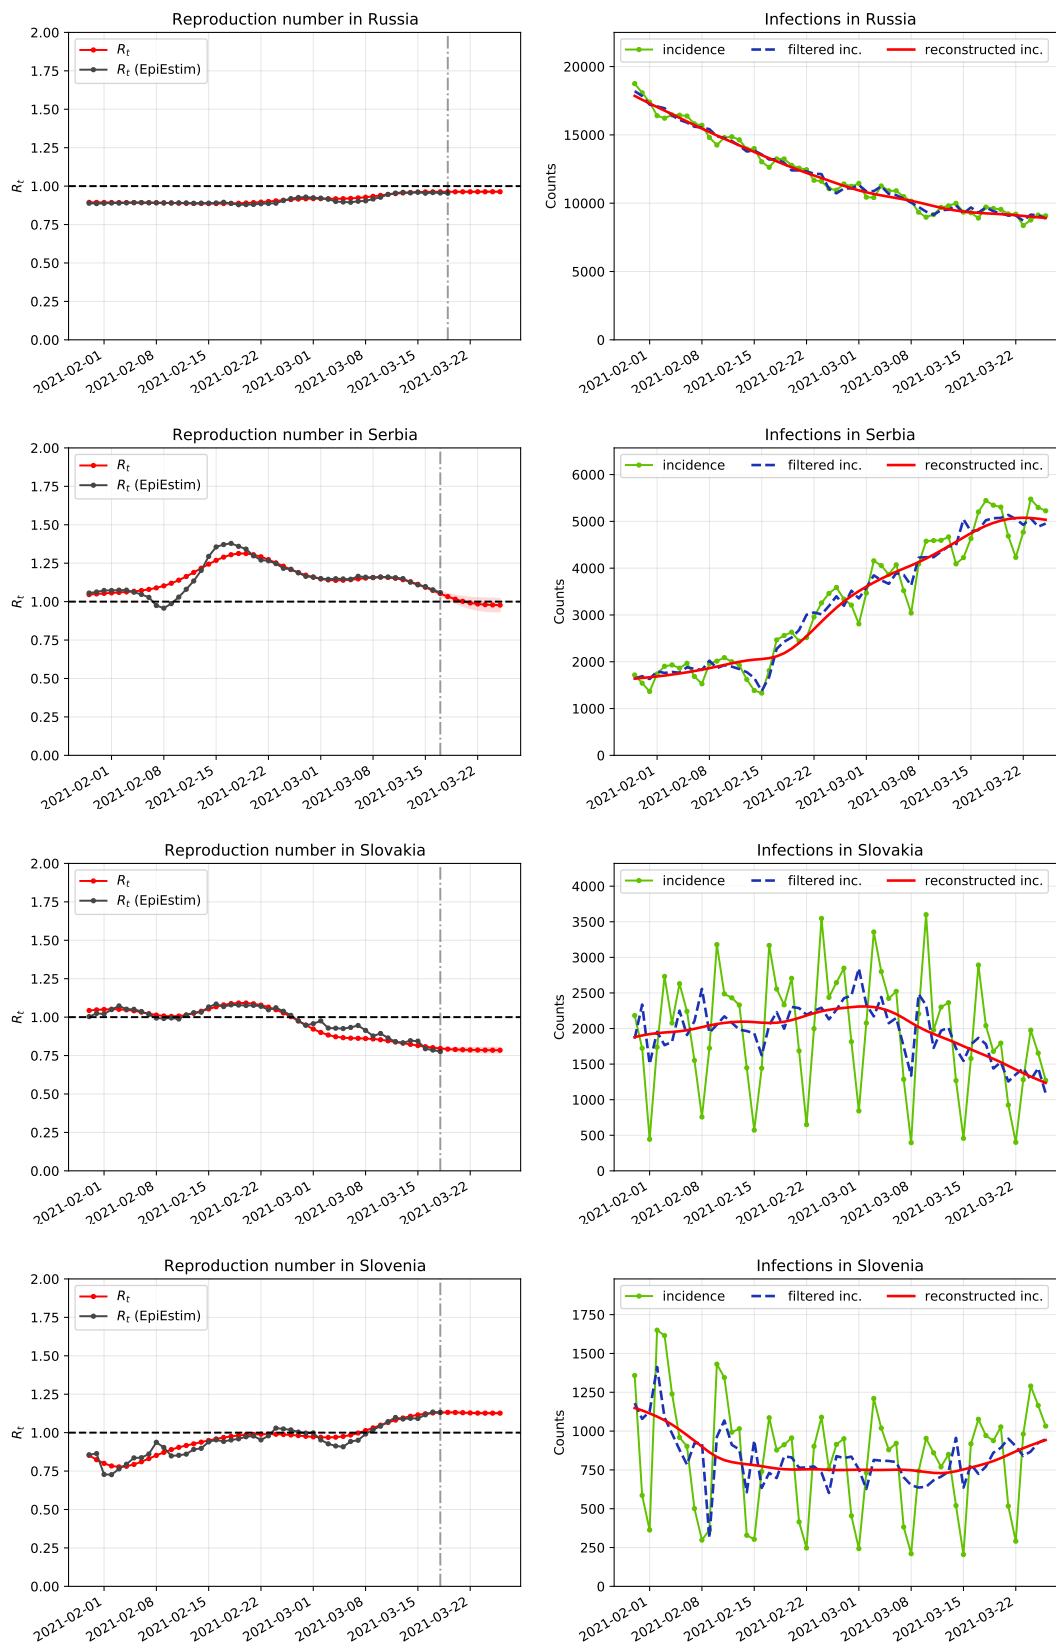

**Fig. S15.** From top to down: Russia ( $\mathcal{I} = 0.621$ ,  $\bar{t} = 7.25$ ,  $\mathcal{S}(\bar{t}) = 0.010$ ,  $R^i(t_c) = 0.954$ ,  $R(t_c) = 0.963$ ), Serbia ( $\mathcal{I} = 0.548$ ,  $\bar{t} = 8.41$ ,  $\mathcal{S}(\bar{t}) = 0.043$ ,  $R^i(t_c) = 1.059$ ,  $R(t_c) = 0.978$ ), Slovakia ( $\mathcal{I} = 0.304$ ,  $\bar{t} = 8.31$ ,  $\mathcal{S}(\bar{t}) = 0.029$ ,  $R^i(t_c) = 0.776$ ,  $R(t_c) = 0.785$ ) and Slovenia ( $\mathcal{I} = 0.354$ ,  $\bar{t} = 7.88$ ,  $\mathcal{S}(\bar{t}) = 0.034$ ,  $R^i(t_c) = 1.132$ ,  $R(t_c) = 1.127$ ).

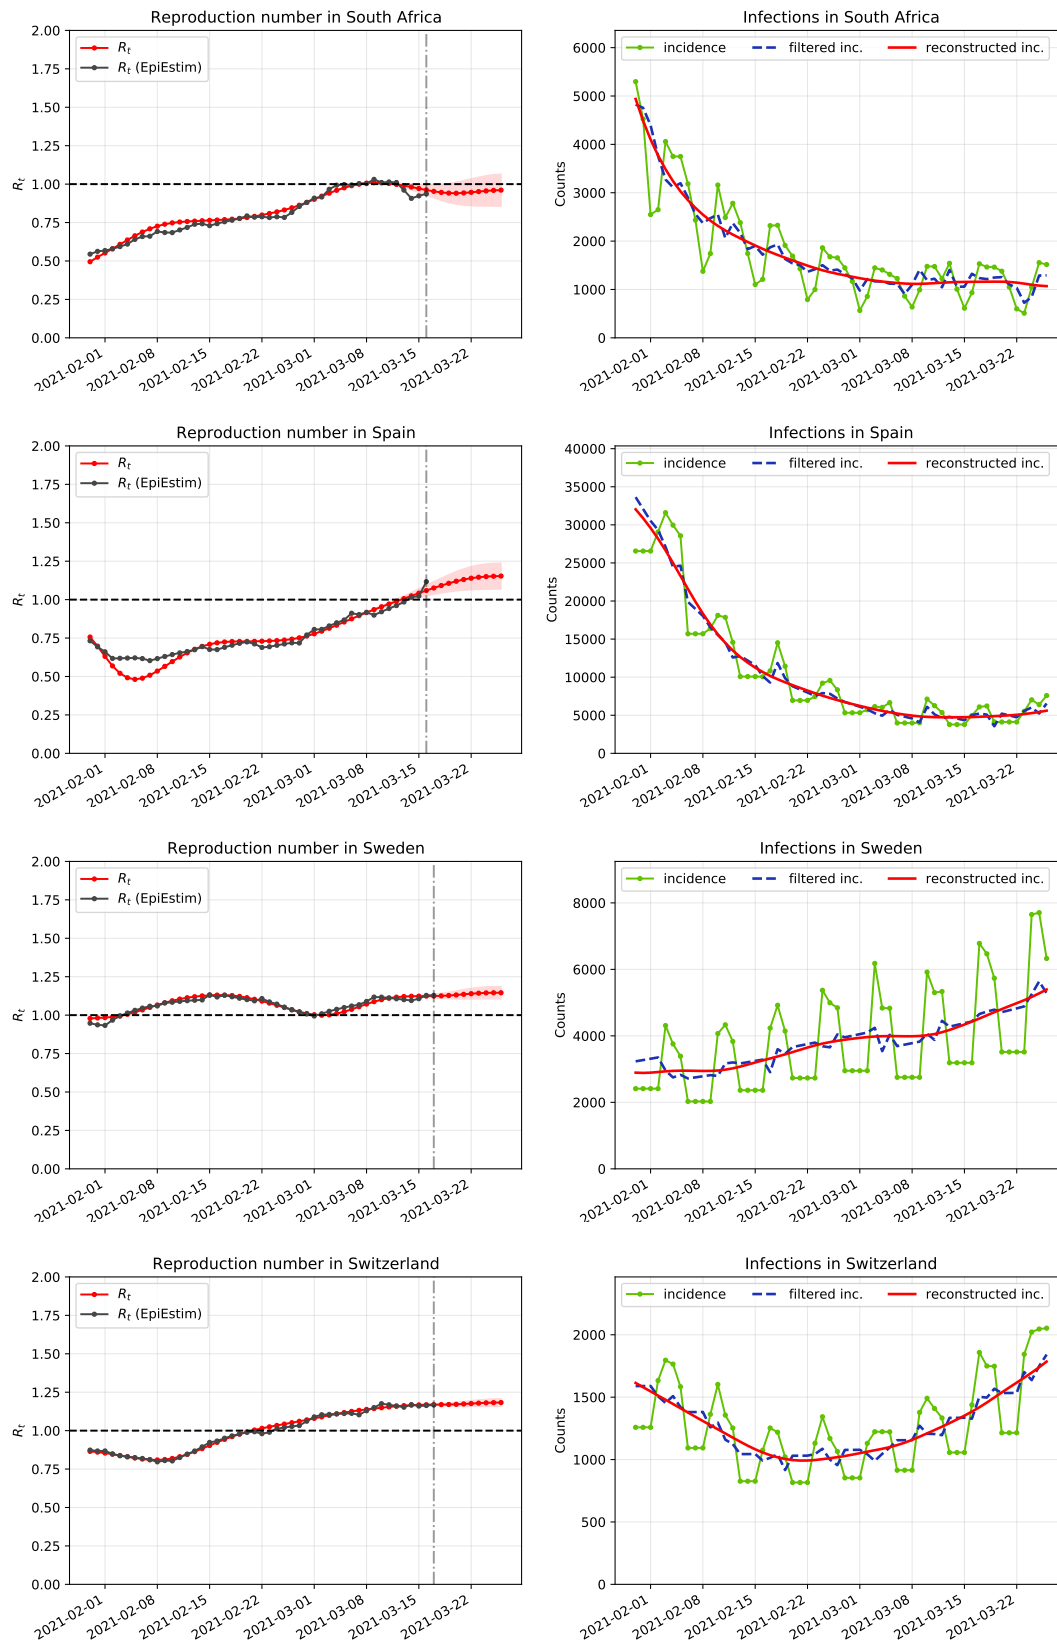

**Fig. S16.** From top to down: South Africa ( $\mathcal{I} = 0.299$ ,  $\bar{t} = 10.42$ ,  $\mathcal{S}(\bar{t}) = 0.055$ ,  $R^i(t_c) = 0.937$ ,  $R(t_c) = 0.961$ ), Spain ( $\mathcal{I} = 0.290$ ,  $\bar{t} = 9.70$ ,  $\mathcal{S}(\bar{t}) = 0.046$ ,  $R^i(t_c) = 1.117$ ,  $R(t_c) = 1.153$ ), Sweden ( $\mathcal{I} = 0.192$ ,  $\bar{t} = 9.45$ ,  $\mathcal{S}(\bar{t}) = 0.022$ ,  $R^i(t_c) = 1.128$ ,  $R(t_c) = 1.146$ ) and Switzerland ( $\mathcal{I} = 0.206$ ,  $\bar{t} = 9.10$ ,  $\mathcal{S}(\bar{t}) = 0.016$ ,  $R^i(t_c) = 1.167$ ,  $R(t_c) = 1.183$ ).

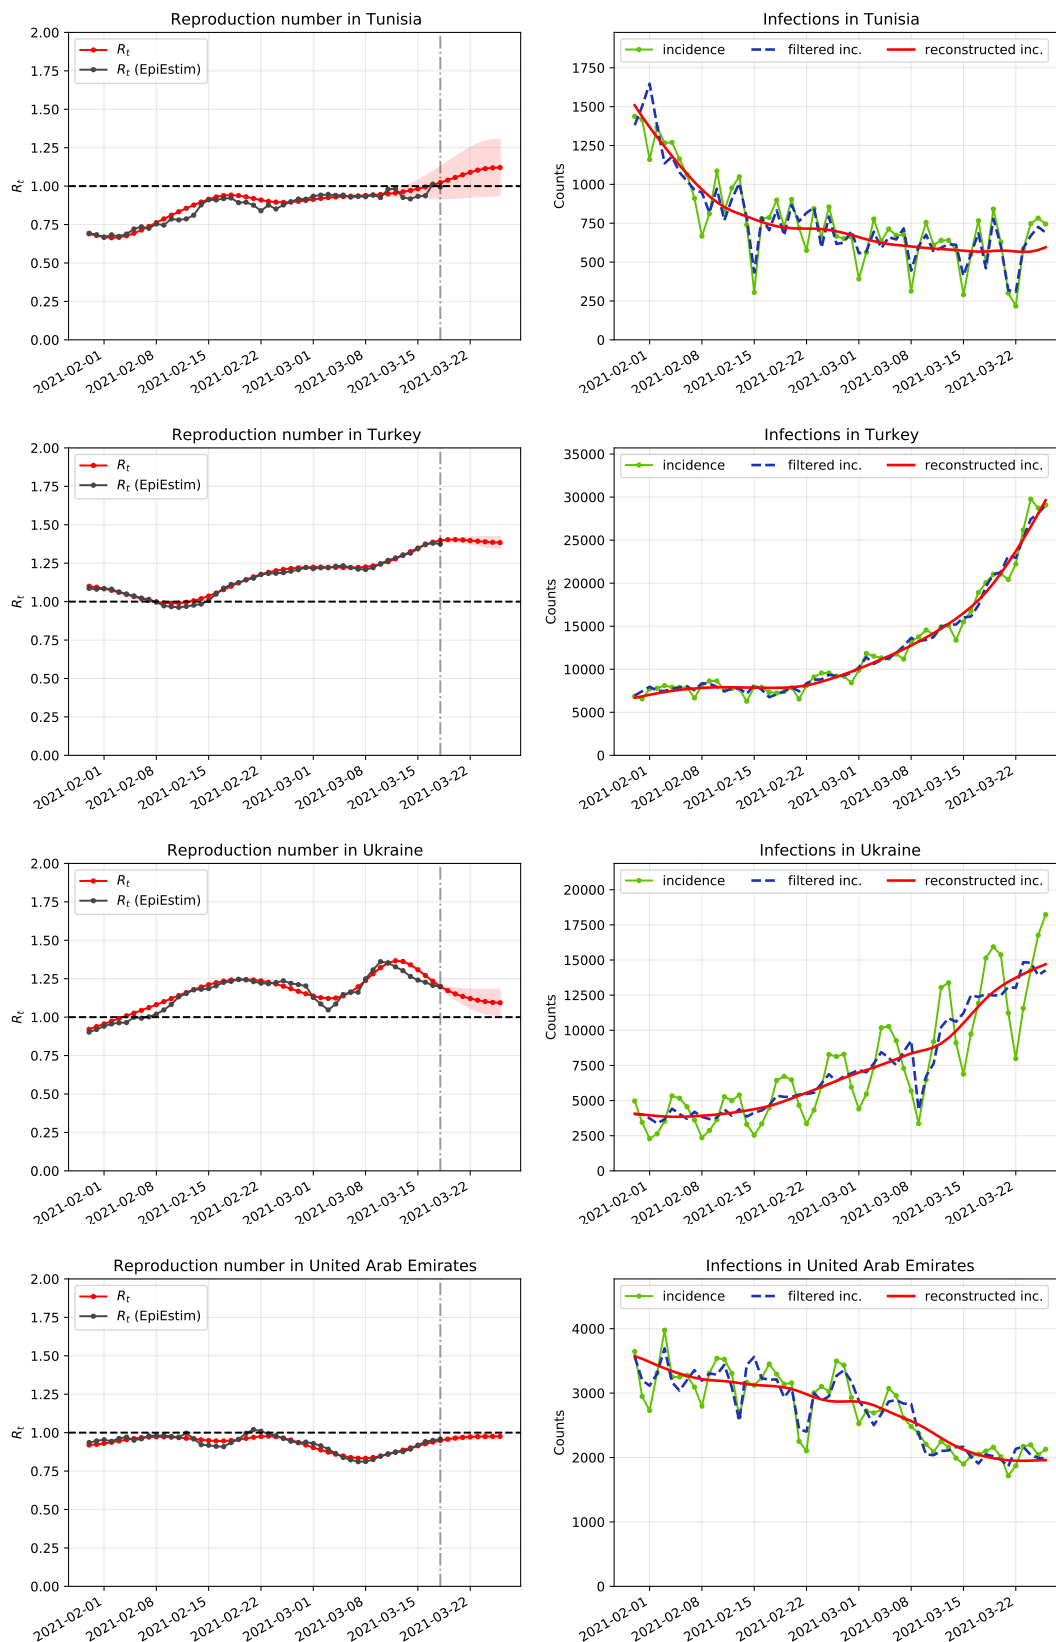

**Fig. S17.** From top to down: Tunisia ( $\mathcal{I} = 0.738$ ,  $\bar{t} = 8.19$ ,  $S(\bar{t}) = 0.038$ ,  $R^i(t_c) = 0.995$ ,  $R(t_c) = 1.121$ ), Turkey ( $\mathcal{I} = 0.554$ ,  $\bar{t} = 8.32$ ,  $S(\bar{t}) = 0.013$ ,  $R^i(t_c) = 1.375$ ,  $R(t_c) = 1.384$ ), Ukraine ( $\mathcal{I} = 0.384$ ,  $\bar{t} = 8.07$ ,  $S(\bar{t}) = 0.034$ ,  $R^i(t_c) = 1.197$ ,  $R(t_c) = 1.093$ ) and United Arab Emirates ( $\mathcal{I} = 0.773$ ,  $\bar{t} = 8.41$ ,  $S(\bar{t}) = 0.021$ ,  $R^i(t_c) = 0.957$ ,  $R(t_c) = 0.975$ ).

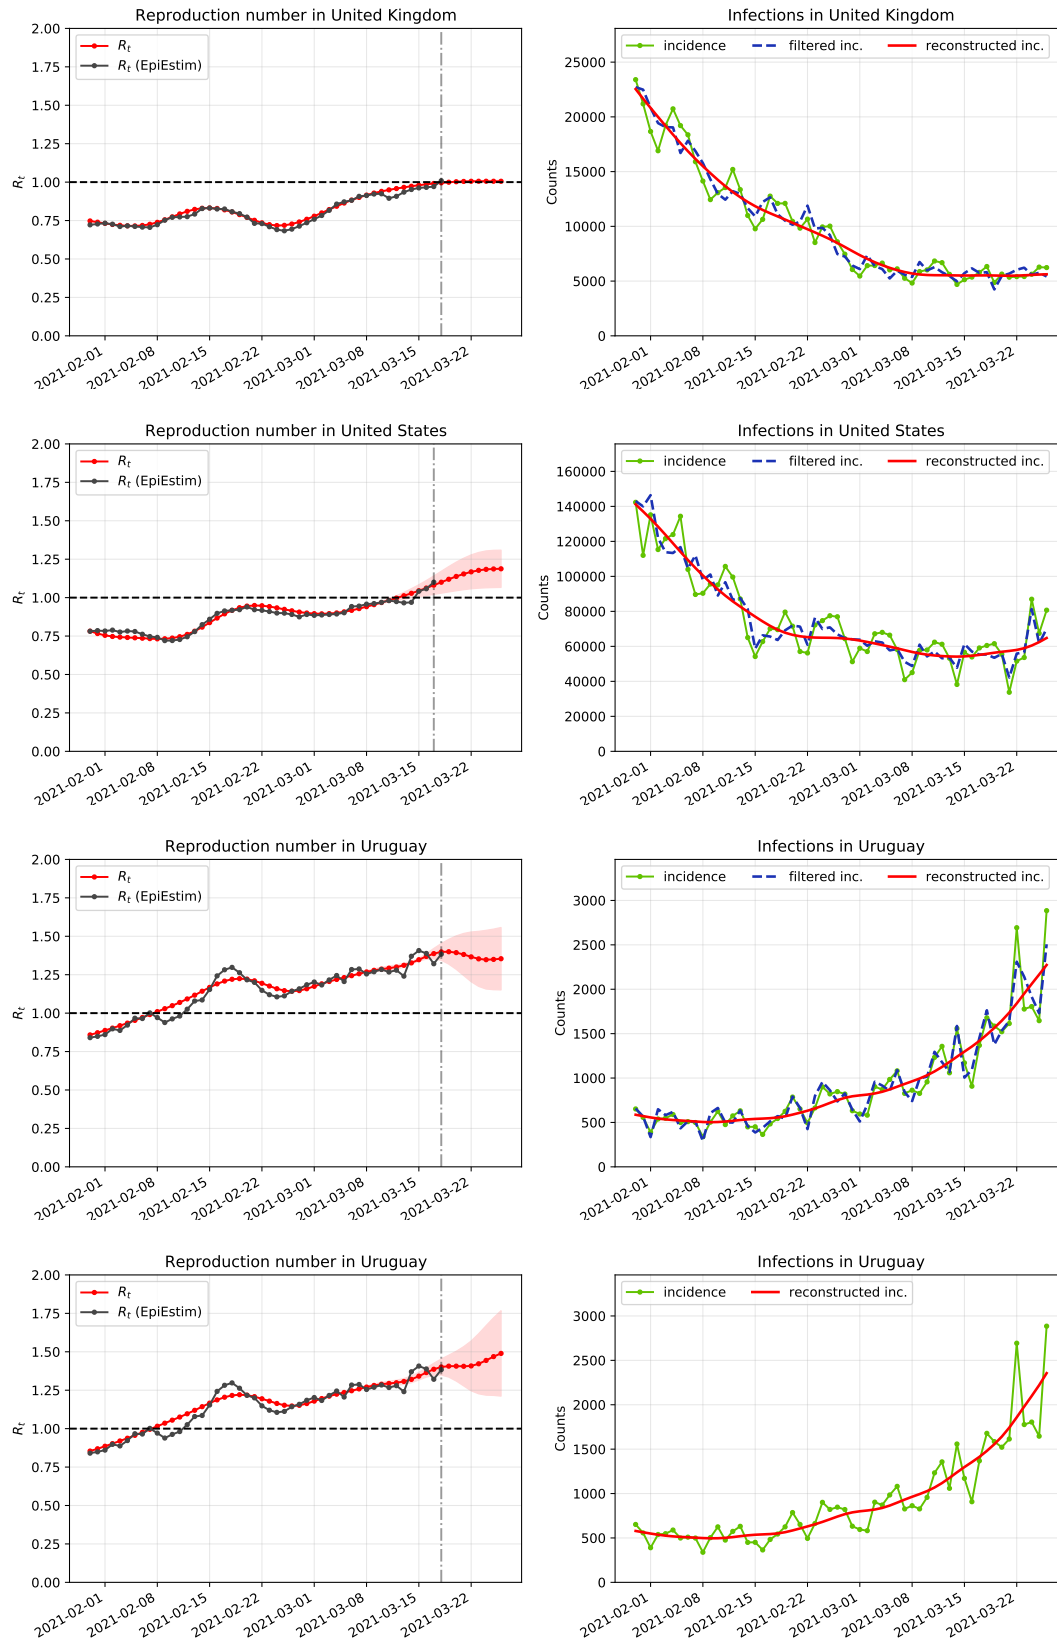

**Fig. S18.** From top to down: United Kingdom ( $\mathcal{I} = 0.557$ ,  $\bar{t} = 8.26$ ,  $\mathcal{S}(\bar{t}) = 0.024$ ,  $R^i(t_c) = 1.009$ ,  $R(t_c) = 1.006$ ), USA ( $\mathcal{I} = 0.569$ ,  $\bar{t} = 8.76$ ,  $\mathcal{S}(\bar{t}) = 0.023$ ,  $R^i(t_c) = 1.100$ ,  $R(t_c) = 1.188$ ), Uruguay ( $\mathcal{I} = 0.822$ ,  $\bar{t} = 8.26$ ,  $\mathcal{S}(\bar{t}) = 0.039$ ,  $R^i(t_c) = 1.384$ ,  $R(t_c) = 1.354$ ) and Uruguay ( $\bar{t} = 8.34$ ,  $\mathcal{S}(\bar{t}) = 0.041$ ,  $R^i(t_c) = 1.384$ ,  $R(t_c) = 1.489$ ).

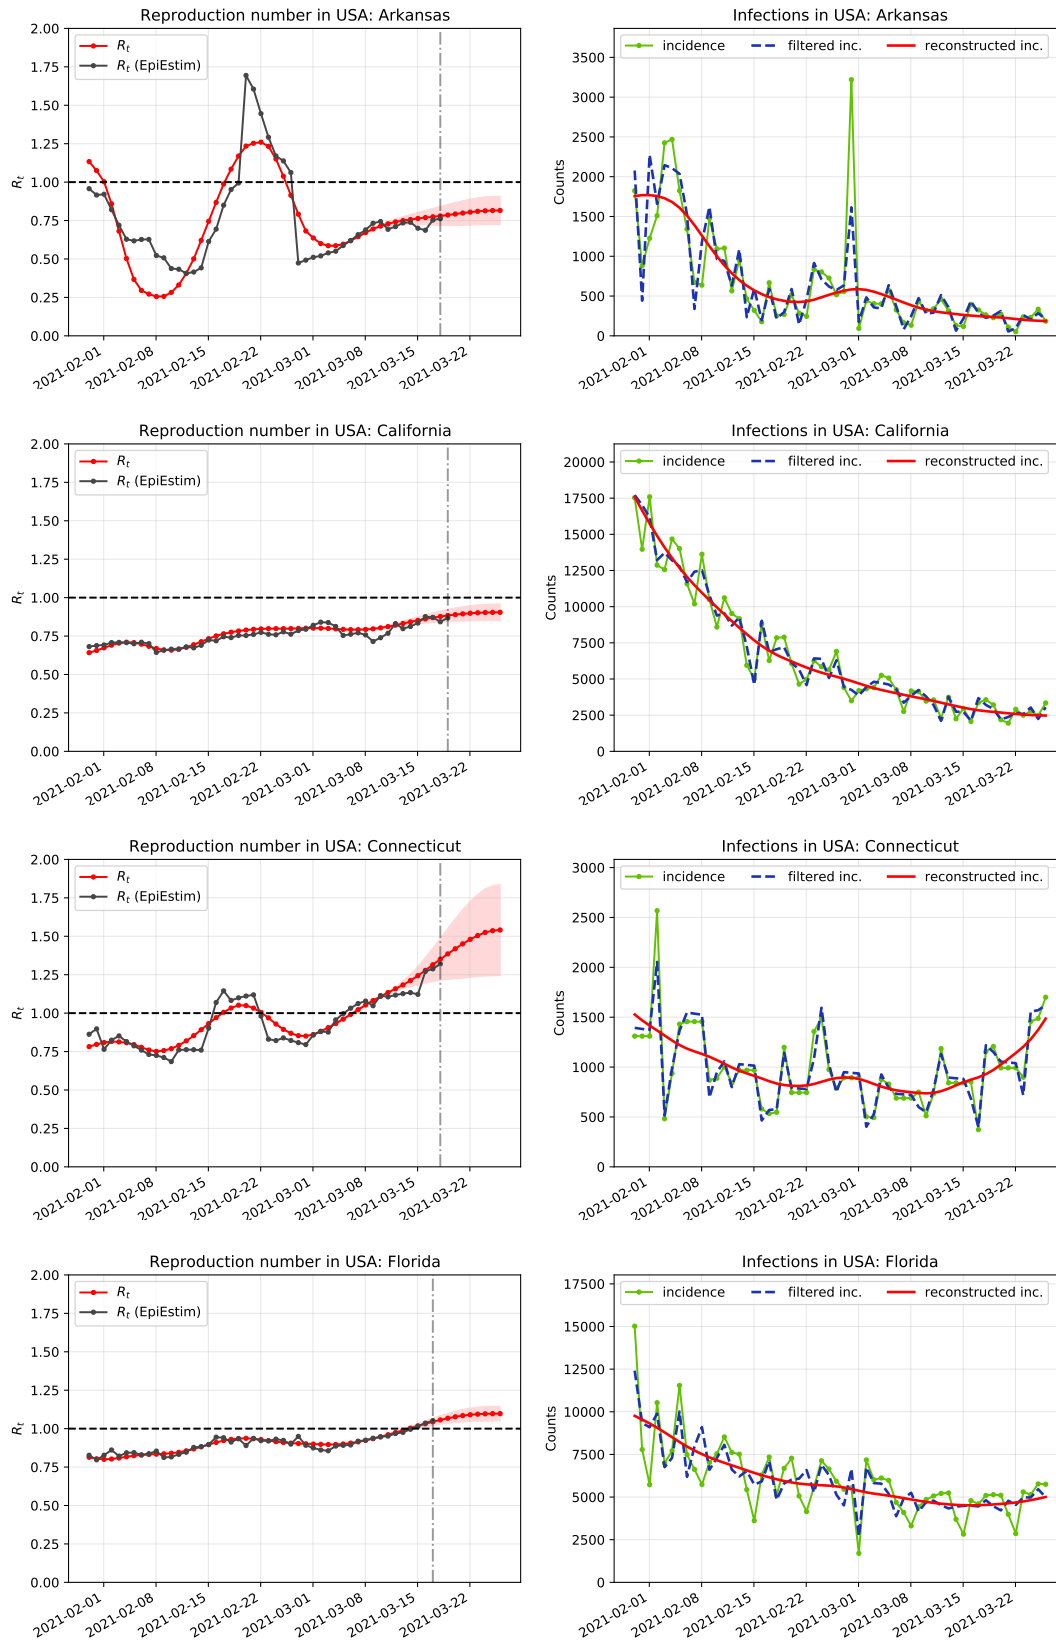

**Fig. S19.** From top to down: Arkansas ( $\mathcal{I} = 0.753$ ,  $\bar{t} = 8.46$ ,  $S(\bar{t}) = 0.155$ ,  $R^i(t_c) = 0.762$ ,  $R(t_c) = 0.816$ ), California ( $\mathcal{I} = 0.692$ ,  $\bar{t} = 6.72$ ,  $S(\bar{t}) = 0.033$ ,  $R^i(t_c) = 0.868$ ,  $R(t_c) = 0.904$ ), Connecticut ( $\mathcal{I} = 0.936$ ,  $\bar{t} = 8.00$ ,  $S(\bar{t}) = 0.061$ ,  $R^i(t_c) = 1.320$ ,  $R(t_c) = 1.541$ ) and Florida ( $\mathcal{I} = 0.606$ ,  $\bar{t} = 8.74$ ,  $S(\bar{t}) = 0.021$ ,  $R^i(t_c) = 1.052$ ,  $R(t_c) = 1.098$ ).



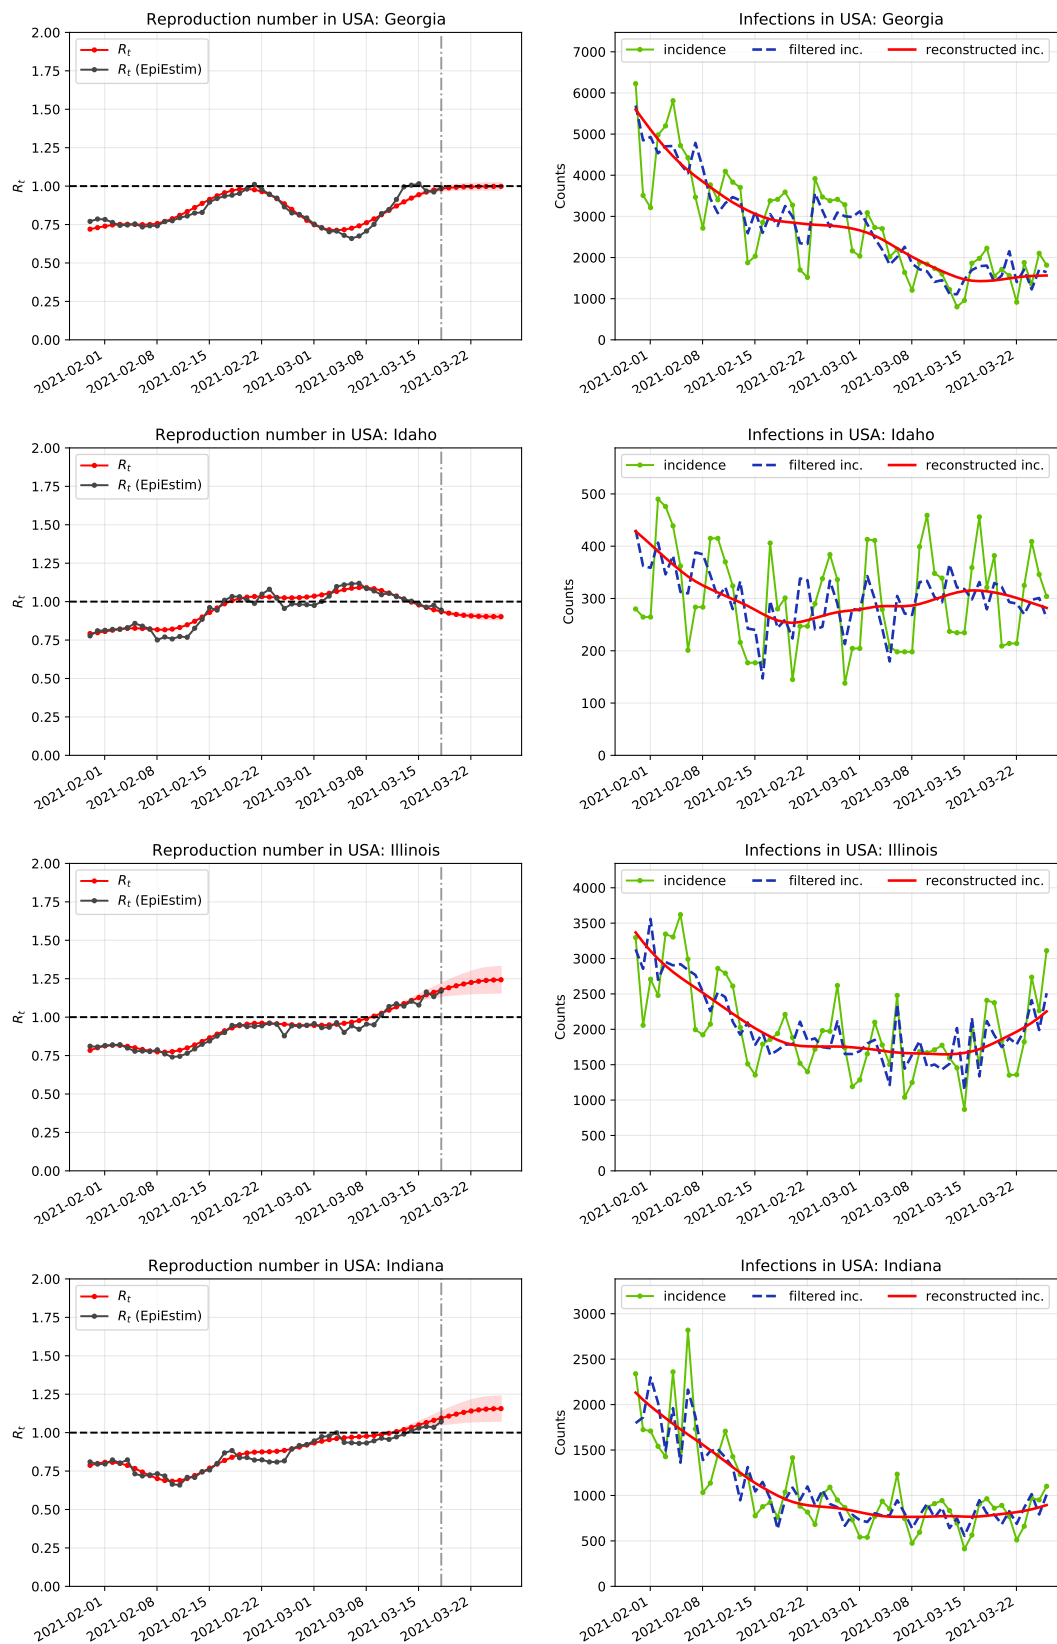

**Fig. S20.** From top to down: Georgia ( $\mathcal{I} = 0.463$ ,  $\bar{t} = 8.13$ ,  $S(\bar{t}) = 0.035$ ,  $R^i(t_c) = 0.988$ ,  $R(t_c) = 0.998$ ), Idaho ( $\mathcal{I} = 0.450$ ,  $\bar{t} = 8.02$ ,  $S(\bar{t}) = 0.034$ ,  $R^i(t_c) = 0.944$ ,  $R(t_c) = 0.902$ ), Illinois ( $\mathcal{I} = 0.516$ ,  $\bar{t} = 8.25$ ,  $S(\bar{t}) = 0.026$ ,  $R^i(t_c) = 1.170$ ,  $R(t_c) = 1.243$ ) and Indiana ( $\mathcal{I} = 0.586$ ,  $\bar{t} = 8.31$ ,  $S(\bar{t}) = 0.031$ ,  $R^i(t_c) = 1.073$ ,  $R(t_c) = 1.156$ ).

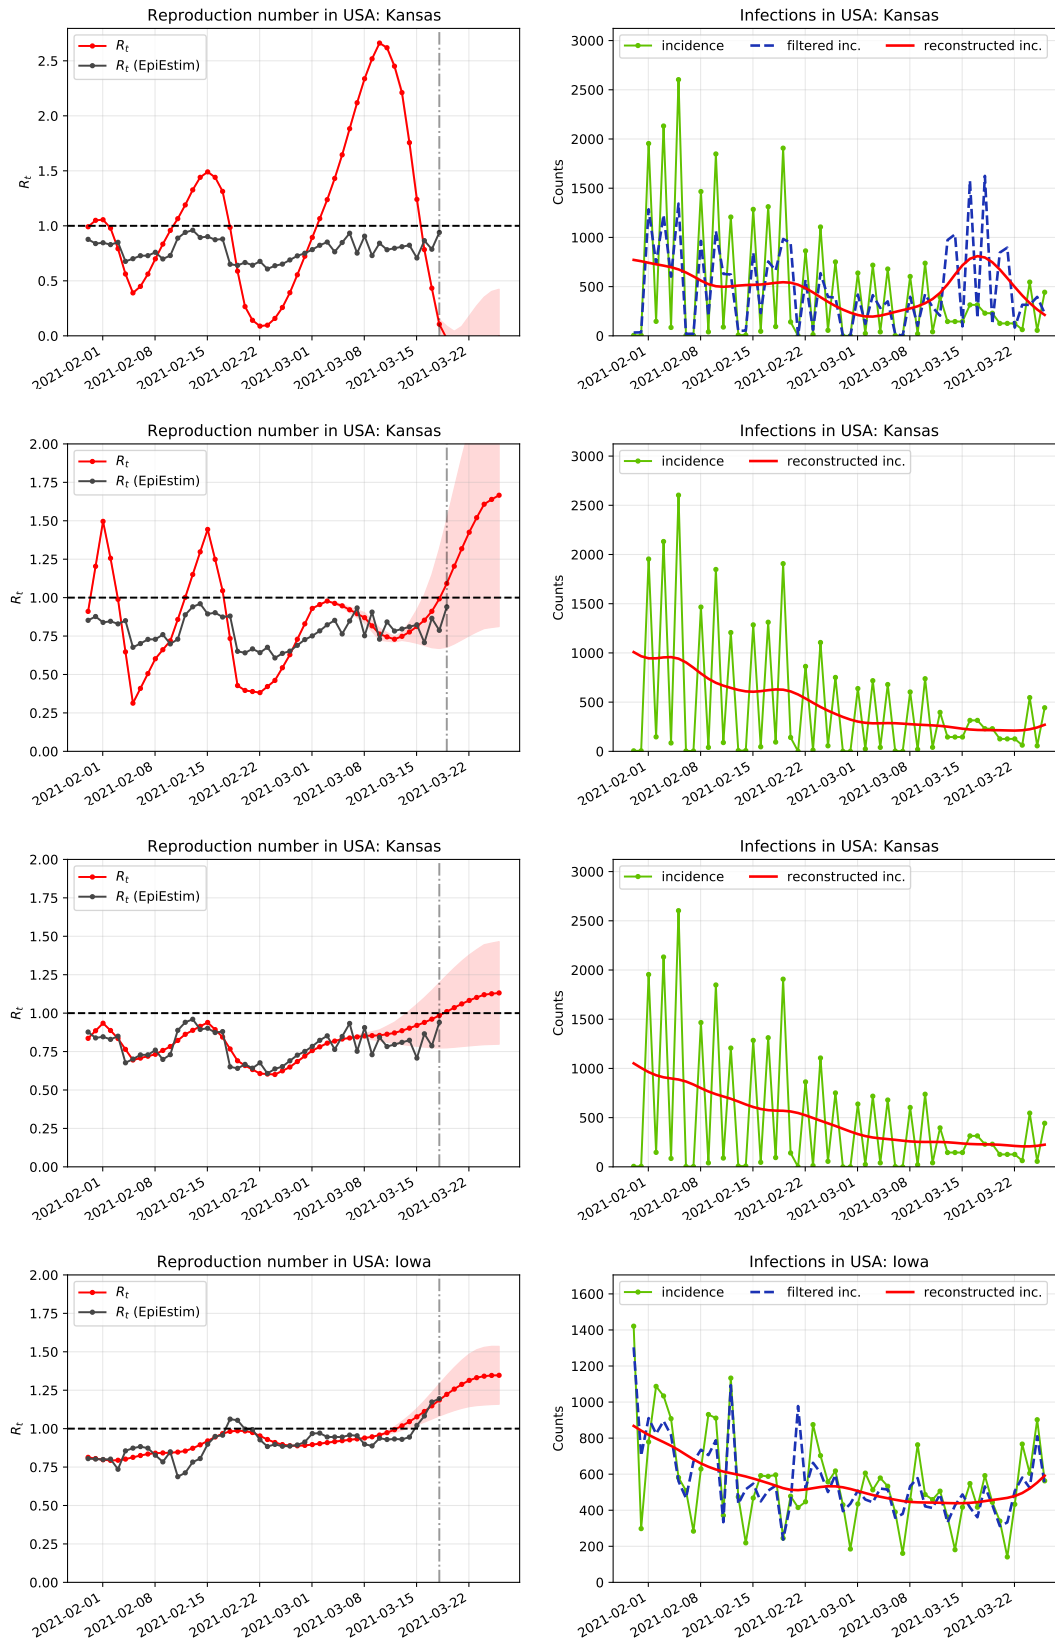

**Fig. S21.** From top to down: Kansas ( $\mathcal{I} = 0.595$ ,  $\bar{t} = 8.50$ ,  $S(\bar{t}) = 0.692$ ,  $R^i(t_c) = 0.940$ ,  $R(t_c) = -0.022$ ,  $\mathcal{V}(\bar{t}) = 1.728$ ), Kansas ( $\bar{t} = 7.42$ ,  $S(\bar{t}) = 0.205$ ,  $R^i(t_c) = 0.940$ ,  $R(t_c) = 1.666$ ), Kansas ( $\bar{t} = 7.59$ ,  $S(\bar{t}) = 0.065$ ,  $R^i(t_c) = 0.940$ ,  $R(t_c) = 1.131$ ,  $w = 40$ ) and Iowa ( $\mathcal{I} = 0.707$ ,  $\bar{t} = 8.49$ ,  $S(\bar{t}) = 0.055$ ,  $R^i(t_c) = 1.195$ ,  $R(t_c) = 1.347$ )

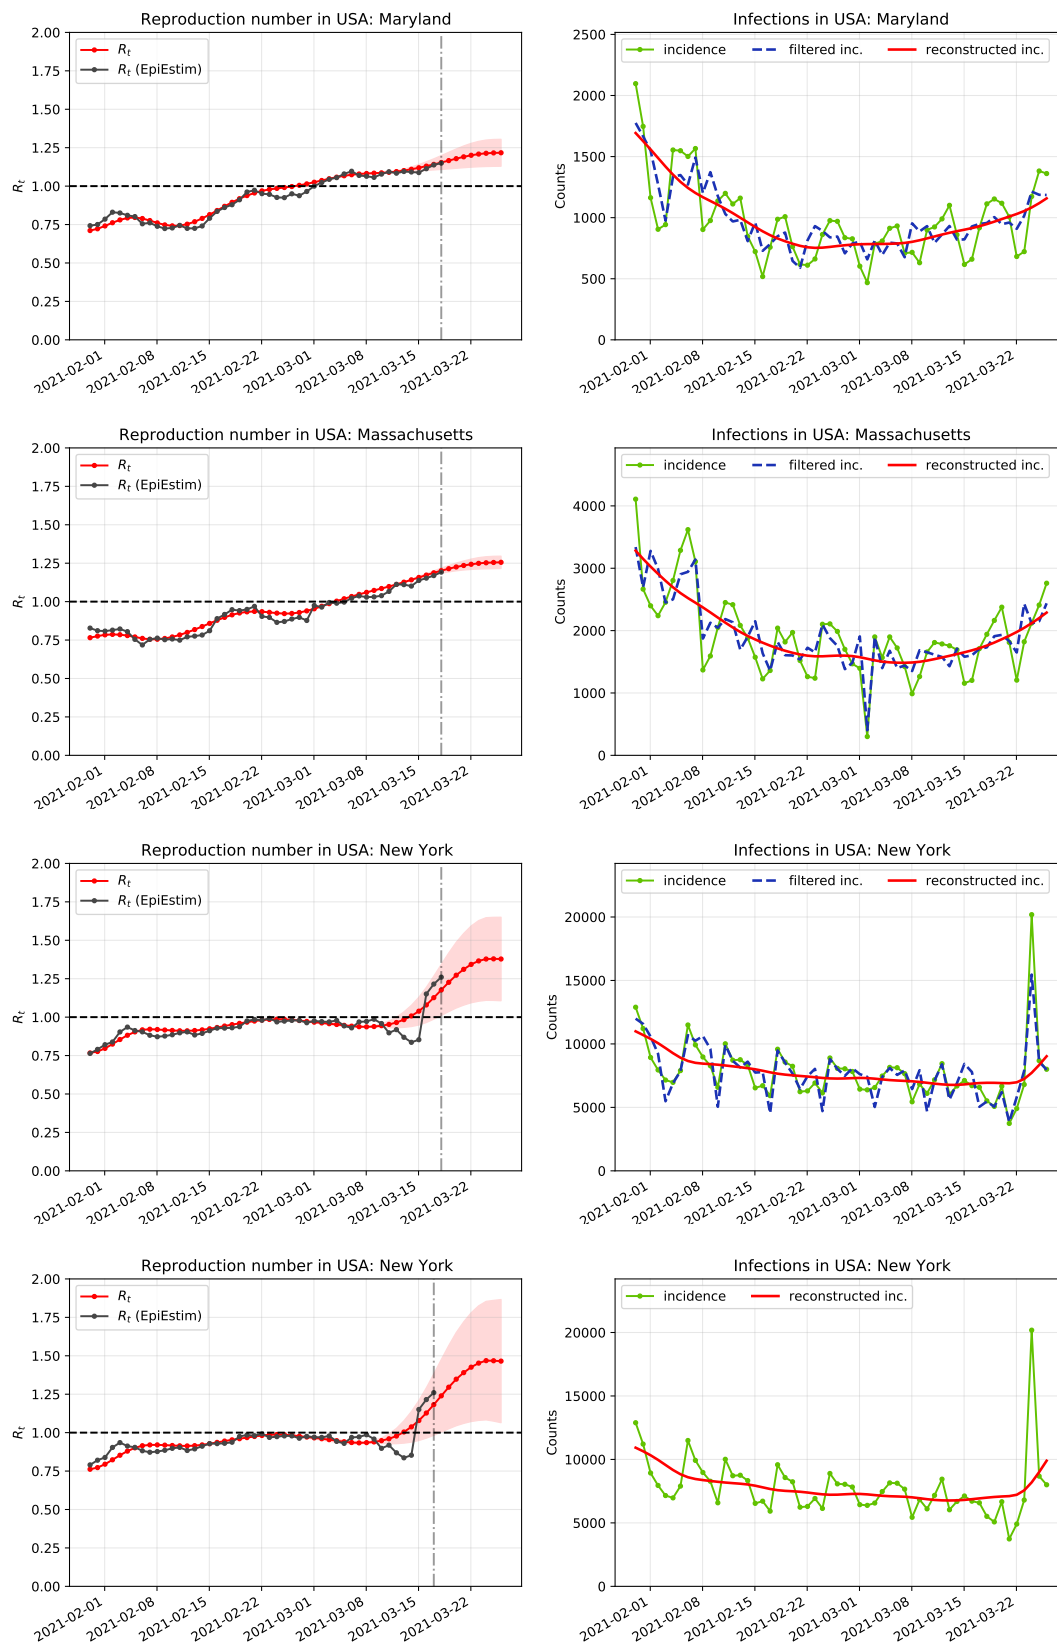

**Fig. S22.** From top to down: Maryland ( $\mathcal{I} = 0.525$ ,  $\bar{t} = 8.20$ ,  $S(\bar{t}) = 0.028$ ,  $R^i(t_c) = 1.150$ ,  $R(t_c) = 1.217$ ), Massachusetts ( $\mathcal{I} = 0.630$ ,  $\bar{t} = 8.35$ ,  $S(\bar{t}) = 0.031$ ,  $R^i(t_c) = 1.192$ ,  $R(t_c) = 1.256$ ), New York ( $\mathcal{I} = 0.860$ ,  $\bar{t} = 8.00$ ,  $S(\bar{t}) = 0.048$ ,  $R^i(t_c) = 1.260$ ,  $R(t_c) = 1.378$ ) and New York ( $\bar{t} = 8.76$ ,  $S(\bar{t}) = 0.049$ ,  $R^i(t_c) = 1.260$ ,  $R(t_c) = 1.465$ ).

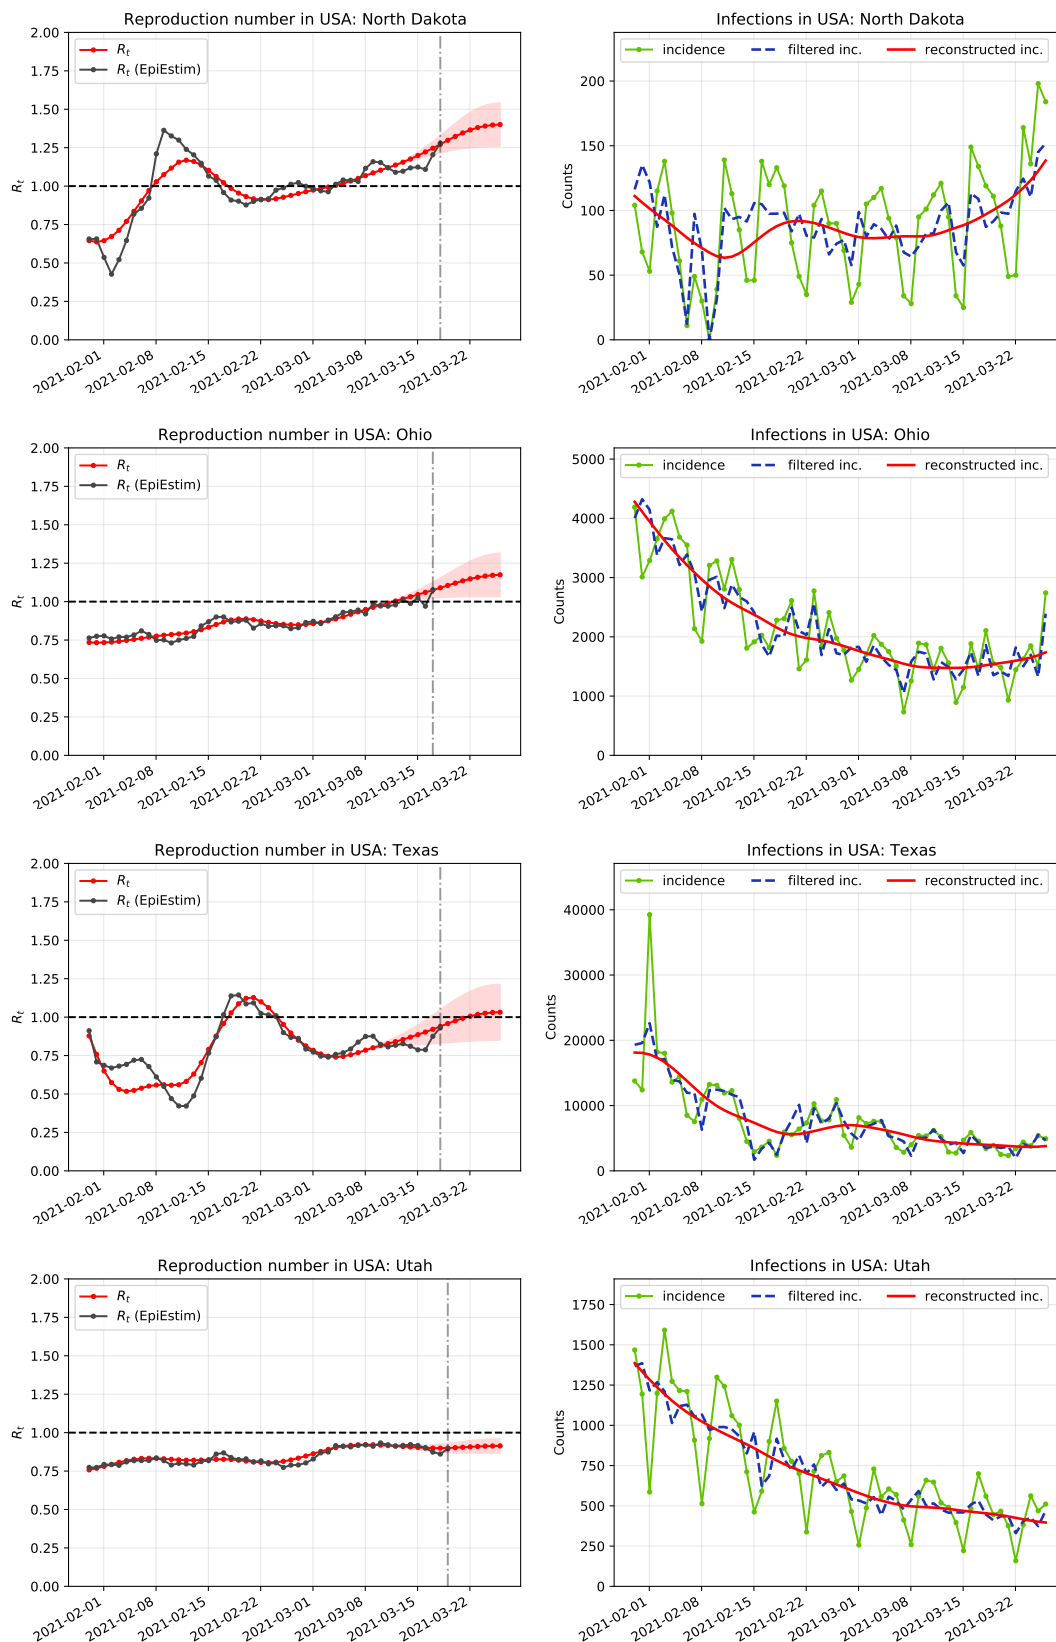

**Fig. S23.** From top to down: North Dakota ( $I = 0.537$ ,  $\bar{t} = 8.00$ ,  $S(\bar{t}) = 0.086$ ,  $R^i(t_c) = 1.279$ ,  $R(t_c) = 1.401$ ), Ohio ( $I = 0.542$ ,  $\bar{t} = 8.55$ ,  $S(\bar{t}) = 0.032$ ,  $R^i(t_c) = 1.077$ ,  $R(t_c) = 1.175$ ), Texas ( $I = 0.576$ ,  $\bar{t} = 7.93$ ,  $S(\bar{t}) = 0.081$ ,  $R^i(t_c) = 0.931$ ,  $R(t_c) = 1.032$ ) and Utah ( $I = 0.292$ ,  $\bar{t} = 7.06$ ,  $S(\bar{t}) = 0.023$ ,  $R^i(t_c) = 0.895$ ,  $R(t_c) = 0.914$ ).

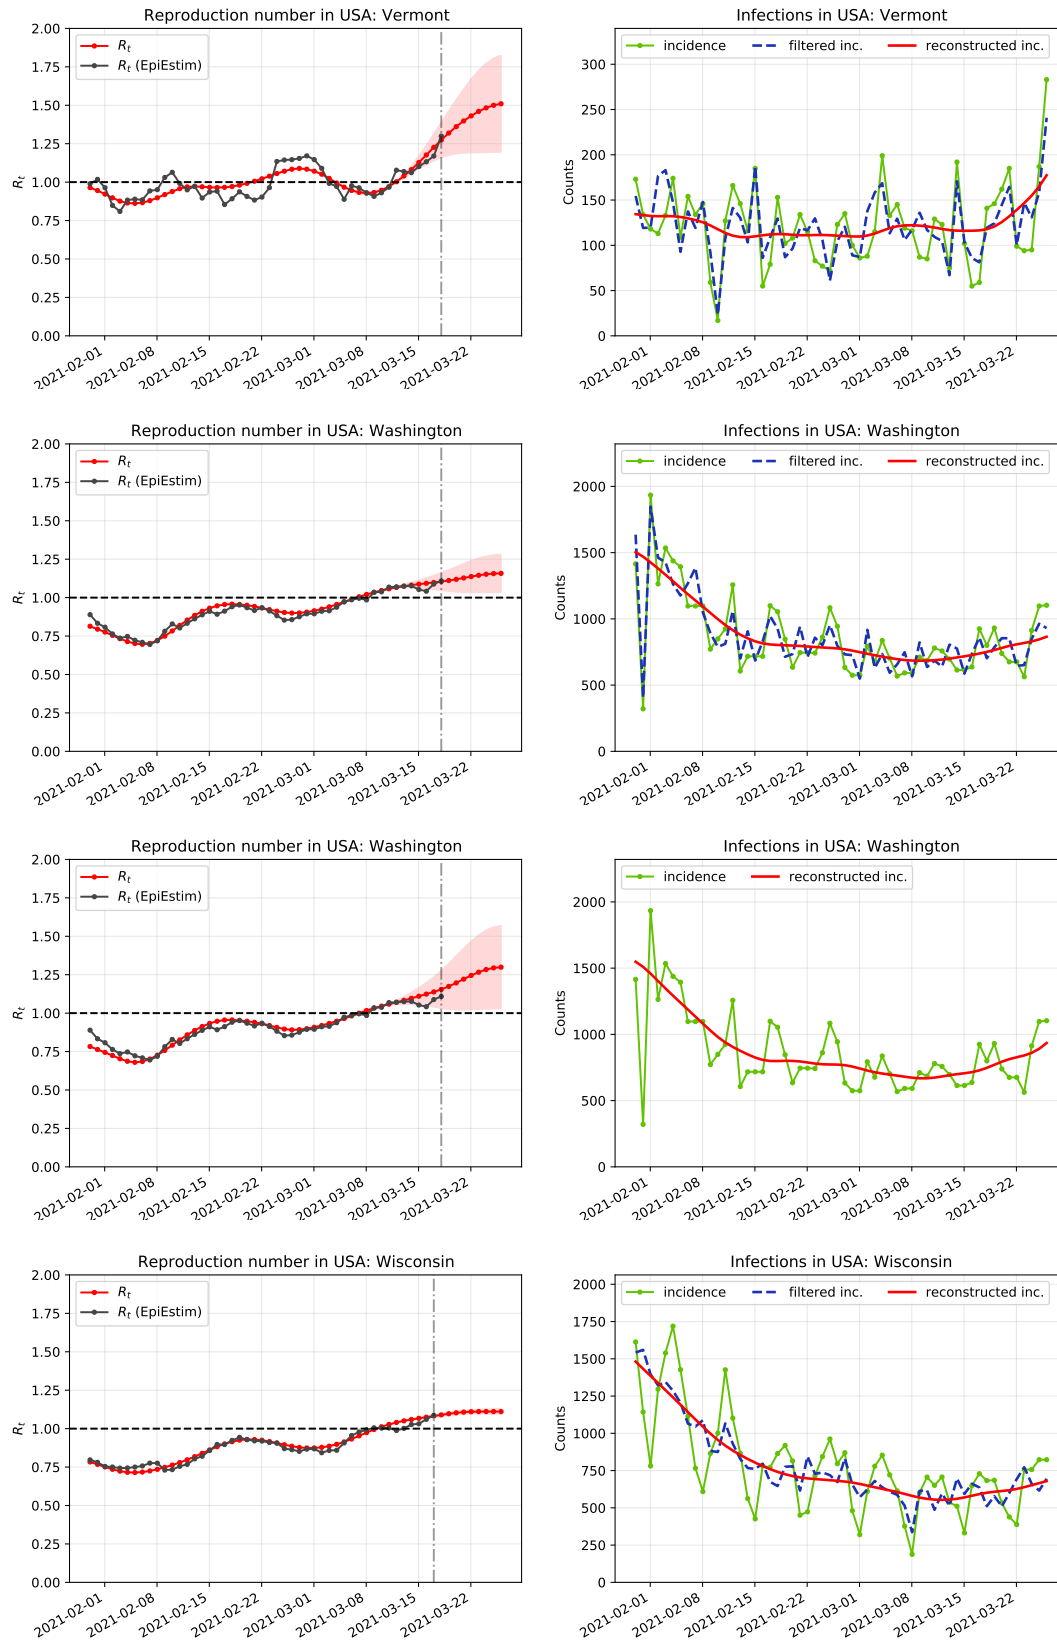

**Fig. S24.** From top to down: Vermont ( $I = 0.760$ ,  $\bar{t} = 8.00$ ,  $S(\bar{t}) = 0.057$ ,  $R^i(t_c) = 1.300$ ,  $R(t_c) = 1.510$ ), Washington ( $I = 0.816$ ,  $\bar{t} = 8.23$ ,  $S(\bar{t}) = 0.027$ ,  $R^i(t_c) = 1.109$ ,  $R(t_c) = 1.158$ ), Washington ( $\bar{t} = 8.47$ ,  $S(\bar{t}) = 0.037$ ,  $R^i(t_c) = 1.109$ ,  $R(t_c) = 1.299$ ) and Wisconsin ( $I = 0.344$ ,  $\bar{t} = 9.29$ ,  $S(\bar{t}) = 0.027$ ,  $R^i(t_c) = 1.086$ ,  $R(t_c) = 1.111$ ).
